# Supplementary material
Source: Royal Society of Chemistry journal article supplement (doi:10.1039/d6cp00136j)
Supplement: d6cp00136j1.pdf [file d6cp00136j1.pdf]

*Electronic supporting information.*

## Top-Down and Bottom-Up evaluation of thermochemistry of $\alpha,\omega$ -alkanediols

Riko Siewert,<sup>1,2</sup> Olga V. Dorofeeva,<sup>3</sup> Artemiy A. Samarov,<sup>4</sup> Arina V. Elbakari,<sup>5</sup> Karsten Müller,<sup>1,2</sup> Peter Wasserscheid,<sup>6</sup> Sergey P. Verevkin<sup>1,2,\*</sup>

<sup>1</sup> *University of Rostock, Institute of Technical Thermodynamics, Albert-Einstein-Str.2, 18059 Rostock, Germany*

<sup>2</sup> *University of Rostock, Competence center °CALOR at the Department Life, Light & Matter*

<sup>3</sup> *Lomonosov Moscow State University, Department of Chemistry, 119991 Moscow, Russia*

<sup>4</sup> *Saint Petersburg State University, Department of Chemical Thermodynamics and Kinetics, Peterhof, 198504 Saint Petersburg, Russia.*

<sup>5</sup> *Samara State Technical University, Chemical-Technological Department, 443100 Samara, Russia*

<sup>6</sup> *Institute of Chemical Reaction Engineering, Friedrich-Alexander-Universität Erlangen-Nürnberg, Egerlandstr. 3, 91058 Erlangen, Germany*

### Materials

The samples of alkanediols used in this work were of commercial origin (see Table S1).

**Table S1.** Provenance and purity of the materials

| Material <sup>a</sup> | CAS       | Origin                      | Initial GC purity | GC purity after purification (mass fraction) |
|-----------------------|-----------|-----------------------------|-------------------|----------------------------------------------|
| 1,5-pentanediol (liq) | 111-29-5  | Thermo Scientific Chemicals | 98%               | 0.9925 <sup>a</sup>                          |
| 1,6-hexanediol (cr)   | 629-11-8  | Sigma-Aldrich               | 99%               | 0.9998                                       |
| 1,7-heptanediol (liq) | 629-30-1  | VWR                         | 98%               | 0.9994 <sup>a</sup>                          |
| 1,8-octanediol (cr)   | 629-41-4  | Acros                       | 99+%              | 0.9997                                       |
| 1,9-nonanediol (cr)   | 3937-56-2 | VWR                         | 99%               | 0.9998                                       |
| 1,10-decanediol (cr)  | 112-47-0  | Thermo Scientific Chemicals | 99%               | 0.9997                                       |

<sup>a</sup> Samples were additionally purified using fractional distillation and used for transpiration measurements

The liquid sample of 1,7-heptanediol was purified by fractional distillation under reduced pressure. Samples of  $\alpha,\omega$ -alkanediols for the transpiration method were used as received. However, before starting the vapor pressure measurements, the samples were preconditioned in the transpiration saturator (see below for details). The crystalline sample of 1,8-octanediol used for the combustion experiments was purified by fractional sublimation under reduced pressure. The water content of the sample of 1,8-octanediol was determined by Karl Fischer titration using a Metrohm 756/831 KF Coulometer. The final purities of the samples were determined by GC. The samples were analysed with a Hewlett Packard 5890 II series gas chromatograph equipped with a flame ionisation detector and an HP-5 capillary column (length, inside diameter, and film thickness of 25 m×0.32 mm×0.25  $\mu$ m). The GC temperature program started at  $T=323$  K, followed by heating at a rate of 0.167 K·s<sup>-1</sup> to  $T=573$  K. No impurities (greater than 0.0006 mass fraction) were detected in samples used for thermochemical measurements.

**Table S2**Conformational analysis of  $\alpha,\omega$ -alkanediols at  $T = 298.15$  K <sup>a</sup>

| Conformer <sup>b</sup>                                                               |                    | Symmetry        | $S^c$<br>J·K <sup>-1</sup> ·mol <sup>-1</sup> | ZPE<br>+ ( $H_{298} - H_0$ ) <sup>d</sup><br>hartree | $E_e^e$<br>hartree | $H^f$<br>kJ·mol <sup>-1</sup> | $\Delta H$<br>kJ·mol <sup>-1</sup> | $\Delta G$<br>kJ·mol <sup>-1</sup> | $p_i^g$<br>% |
|--------------------------------------------------------------------------------------|--------------------|-----------------|-----------------------------------------------|------------------------------------------------------|--------------------|-------------------------------|------------------------------------|------------------------------------|--------------|
| <b>1,2-ethanediol</b>                                                                |                    |                 |                                               |                                                      |                    |                               |                                    |                                    |              |
| Relative population of conformers: <sup>h</sup> 95% of HB and 5% of F                |                    |                 |                                               |                                                      |                    |                               |                                    |                                    |              |
| 1                                                                                    | HB                 | C <sub>1</sub>  | 301.31                                        | 0.090374                                             | -230.039208        | -603730.7                     | 0.00                               | 0.00                               | 53.71        |
| 2                                                                                    | HB                 | C <sub>1</sub>  | 299.24                                        | 0.090381                                             | -230.038583        | -603729.0                     | 1.66                               | 2.28                               | 21.43        |
| 3                                                                                    | HB                 | C <sub>2</sub>  | 304.80                                        | 0.090357                                             | -230.037804        | -603727.0                     | 3.64                               | 2.60                               | 18.81        |
| 4                                                                                    | F                  | C <sub>1</sub>  | 307.48                                        | 0.090231                                             | -230.035002        | -603720.0                     | 10.67                              | 8.83                               | 1.52         |
| 5                                                                                    | HB                 | C <sub>2</sub>  | 309.43                                        | 0.090007                                             | -230.034478        | -603719.2                     | 11.46                              | 9.04                               | 1.40         |
| 6                                                                                    | F                  | C <sub>2</sub>  | 307.89                                        | 0.089982                                             | -230.034267        | -603718.7                     | 11.94                              | 9.98                               | 0.96         |
| 7                                                                                    | F                  | C <sub>2h</sub> | 299.03                                        | 0.090212                                             | -230.035199        | -603720.6                     | 10.10                              | 10.78                              | 0.69         |
| 8                                                                                    | F                  | C <sub>i</sub>  | 300.09                                        | 0.090313                                             | -230.035041        | -603719.9                     | 10.78                              | 11.14                              | 0.60         |
| 9                                                                                    | F                  | C <sub>1</sub>  | 307.67                                        | 0.089980                                             | -230.033656        | -603717.1                     | 13.54                              | 11.65                              | 0.49         |
| 10                                                                                   | F                  | C <sub>2</sub>  | 298.60                                        | 0.090259                                             | -230.034726        | -603719.2                     | 11.47                              | 12.27                              | 0.38         |
| <b>1,3-propanediol</b>                                                               |                    |                 |                                               |                                                      |                    |                               |                                    |                                    |              |
| Relative population of conformers: <sup>h</sup> 70% of HB and 30% of F               |                    |                 |                                               |                                                      |                    |                               |                                    |                                    |              |
| 1                                                                                    | HB                 | C <sub>1</sub>  | 327.14                                        | 0.119987                                             | -269.298652        | -706728.6                     | 0.00                               | 0.00                               | 33.10        |
| 2                                                                                    | HB                 | C <sub>1</sub>  | 325.26                                        | 0.120068                                             | -269.298404        | -706727.7                     | 0.86                               | 1.43                               | 18.62        |
| 3                                                                                    | HB                 | C <sub>1</sub>  | 336.73                                        | 0.120002                                             | -269.296501        | -706722.9                     | 5.69                               | 2.83                               | 10.57        |
| 4                                                                                    | F                  | C <sub>2</sub>  | 332.27                                        | 0.119756                                             | -269.296551        | -706723.7                     | 4.91                               | 3.38                               | 8.46         |
| 5                                                                                    | HB                 | C <sub>1</sub>  | 336.56                                        | 0.119955                                             | -269.296193        | -706722.2                     | 6.37                               | 3.57                               | 7.86         |
| 6                                                                                    | F                  | C <sub>1</sub>  | 336.07                                        | 0.119745                                             | -269.295825        | -706721.8                     | 6.79                               | 4.13                               | 6.26         |
| 7                                                                                    | F                  | C <sub>1</sub>  | 338.33                                        | 0.119708                                             | -269.295235        | -706720.3                     | 8.24                               | 4.90                               | 4.58         |
| 8                                                                                    | F                  | C <sub>1</sub>  | 338.33                                        | 0.119748                                             | -269.295132        | -706720.0                     | 8.61                               | 5.28                               | 3.93         |
| 9                                                                                    | F                  | C <sub>1</sub>  | 337.40                                        | 0.119737                                             | -269.295094        | -706719.9                     | 8.68                               | 5.63                               | 3.42         |
| 10                                                                                   | F                  | C <sub>1</sub>  | 337.27                                        | 0.119724                                             | -269.294741        | -706719.0                     | 9.58                               | 6.56                               | 2.35         |
| 11                                                                                   | F                  | C <sub>2</sub>  | 328.23                                        | 0.119755                                             | -269.294832        | -706719.2                     | 9.42                               | 9.10                               | 0.84         |
| <b>1,4-butanediol</b>                                                                |                    |                 |                                               |                                                      |                    |                               |                                    |                                    |              |
| Relative population of conformers: <sup>h</sup> 29% of HB, 50% of F-lin and 21% of F |                    |                 |                                               |                                                      |                    |                               |                                    |                                    |              |
| 1                                                                                    | HB <sup>i</sup>    | C <sub>1</sub>  | 352.09                                        | 0.149683                                             | -308.557713        | -809725.3                     | 0.00                               | 0.00                               | 10.61        |
| 2                                                                                    | HB <sup>i</sup>    | C <sub>1</sub>  | 353.86                                        | 0.149638                                             | -308.557167        | -809724.0                     | 1.32                               | 0.79                               | 7.72         |
| 3                                                                                    | HB <sup>i</sup>    | C <sub>1</sub>  | 350.87                                        | 0.149669                                             | -308.557429        | -809724.6                     | 0.71                               | 1.07                               | 6.89         |
| 4                                                                                    | F-lin <sup>i</sup> | C <sub>1</sub>  | 368.18                                        | 0.149139                                             | -308.554494        | -809718.3                     | 7.02                               | 2.22                               | 4.33         |
| 5                                                                                    | F-lin <sup>i</sup> | C <sub>i</sub>  | 363.47                                        | 0.149134                                             | -308.554925        | -809719.4                     | 5.88                               | 2.48                               | 3.90         |
| 6                                                                                    | F-lin <sup>i</sup> | C <sub>1</sub>  | 370.24                                        | 0.149225                                             | -308.554226        | -809717.3                     | 7.95                               | 2.54                               | 3.81         |
| 7                                                                                    | F-lin <sup>i</sup> | C <sub>1</sub>  | 368.43                                        | 0.149173                                             | -308.554347        | -809717.8                     | 7.50                               | 2.62                               | 3.68         |
| 8                                                                                    | F-lin              | C <sub>1</sub>  | 369.01                                        | 0.149177                                             | -308.554170        | -809717.3                     | 7.97                               | 2.93                               | 3.26         |
| 9                                                                                    | F-lin              | C <sub>1</sub>  | 372.21                                        | 0.149143                                             | -308.553767        | -809716.3                     | 8.94                               | 2.94                               | 3.24         |
| 10                                                                                   | F <sup>i</sup>     | C <sub>1</sub>  | 368.64                                        | 0.149354                                             | -308.554315        | -809717.2                     | 8.06                               | 3.12                               | 3.01         |
| 11                                                                                   | F-lin              | C <sub>1</sub>  | 372.42                                        | 0.149225                                             | -308.553606        | -809715.7                     | 9.58                               | 3.52                               | 2.57         |
| 12                                                                                   | F-lin              | C <sub>1</sub>  | 369.96                                        | 0.149216                                             | -308.553834        | -809716.3                     | 8.96                               | 3.63                               | 2.46         |
| 13                                                                                   | F-lin <sup>i</sup> | C <sub>1</sub>  | 369.36                                        | 0.149227                                             | -308.553682        | -809715.9                     | 9.39                               | 4.24                               | 1.92         |
| 14                                                                                   | F-lin              | C <sub>1</sub>  | 370.05                                        | 0.149123                                             | -308.553466        | -809715.6                     | 9.68                               | 4.32                               | 1.85         |
| 15                                                                                   | F-lin              | C <sub>1</sub>  | 369.92                                        | 0.149251                                             | -308.553529        | -809715.4                     | 9.85                               | 4.53                               | 1.71         |
| 16                                                                                   | F-lin              | C <sub>1</sub>  | 370.63                                        | 0.149147                                             | -308.553336        | -809715.2                     | 10.08                              | 4.55                               | 1.69         |
| 17                                                                                   | F-lin <sup>i</sup> | C <sub>1</sub>  | 367.88                                        | 0.149176                                             | -308.553635        | -809715.9                     | 9.38                               | 4.67                               | 1.62         |
| 18                                                                                   | F-lin <sup>i</sup> | C <sub>1</sub>  | 369.81                                        | 0.149199                                             | -308.553438        | -809715.3                     | 9.95                               | 4.67                               | 1.61         |
| 19                                                                                   | F                  | C <sub>2</sub>  | 362.00                                        | 0.149355                                             | -308.554458        | -809717.6                     | 7.68                               | 4.73                               | 1.58         |
| 20                                                                                   | F-lin              | C <sub>1</sub>  | 369.50                                        | 0.149239                                             | -308.553463        | -809715.3                     | 9.99                               | 4.80                               | 1.53         |
| 21                                                                                   | F-lin <sup>i</sup> | C <sub>i</sub>  | 361.82                                        | 0.149154                                             | -308.554161        | -809717.3                     | 7.94                               | 5.03                               | 1.39         |
| 22                                                                                   | HB <sup>i</sup>    | C <sub>1</sub>  | 355.86                                        | 0.149692                                             | -308.555371        | -809719.1                     | 6.17                               | 5.05                               | 1.39         |
| 23                                                                                   | F-lin <sup>i</sup> | C <sub>2</sub>  | 361.74                                        | 0.149222                                             | -308.554223        | -809717.3                     | 7.95                               | 5.07                               | 1.37         |
| 24                                                                                   | HB <sup>i</sup>    | C <sub>1</sub>  | 353.94                                        | 0.149682                                             | -308.555538        | -809719.6                     | 5.71                               | 5.15                               | 1.33         |
| 25                                                                                   | F-lin              | C <sub>2</sub>  | 363.99                                        | 0.149081                                             | -308.553750        | -809716.5                     | 8.82                               | 5.27                               | 1.26         |
| 26                                                                                   | F                  | C <sub>1</sub>  | 371.07                                        | 0.149365                                             | -308.553226        | -809714.3                     | 10.94                              | 5.28                               | 1.26         |
| 27                                                                                   | F-lin <sup>i</sup> | C <sub>1</sub>  | 368.70                                        | 0.149176                                             | -308.553260        | -809714.9                     | 10.36                              | 5.41                               | 1.20         |

|    |                    |                 |        |          |             |           |       |       |      |
|----|--------------------|-----------------|--------|----------|-------------|-----------|-------|-------|------|
| 28 | F                  | C <sub>1</sub>  | 372.24 | 0.149301 | -308.552865 | -809713.6 | 11.73 | 5.72  | 1.06 |
| 29 | F-lin              | C <sub>i</sub>  | 366.32 | 0.149288 | -308.553468 | -809715.2 | 10.11 | 5.86  | 1.00 |
| 30 | F                  | C <sub>1</sub>  | 372.76 | 0.149213 | -308.552641 | -809713.2 | 12.08 | 5.92  | 0.98 |
| 31 | F <sup>i</sup>     | C <sub>2</sub>  | 363.63 | 0.149356 | -308.553813 | -809715.9 | 9.38  | 5.94  | 0.97 |
| 32 | F                  | C <sub>1</sub>  | 370.66 | 0.149186 | -308.552826 | -809713.8 | 11.52 | 5.99  | 0.95 |
| 33 | F                  | C <sub>1</sub>  | 372.12 | 0.149257 | -308.552723 | -809713.3 | 11.98 | 6.01  | 0.94 |
| 34 | F-lin              | C <sub>2h</sub> | 361.73 | 0.149198 | -308.553830 | -809716.4 | 8.92  | 6.04  | 0.93 |
| 35 | F                  | C <sub>1</sub>  | 371.19 | 0.149356 | -308.552887 | -809713.5 | 11.81 | 6.12  | 0.90 |
| 36 | F-lin <sup>i</sup> | C <sub>i</sub>  | 362.40 | 0.149225 | -308.553592 | -809715.7 | 9.62  | 6.54  | 0.76 |
| 37 | F                  | C <sub>1</sub>  | 369.83 | 0.149292 | -308.552779 | -809713.4 | 11.93 | 6.63  | 0.73 |
| 38 | F                  | C <sub>1</sub>  | 370.46 | 0.149295 | -308.552676 | -809713.1 | 12.20 | 6.73  | 0.70 |
| 39 | F                  | C <sub>1</sub>  | 372.61 | 0.149216 | -308.552348 | -809712.4 | 12.86 | 6.74  | 0.70 |
| 40 | F                  | C <sub>1</sub>  | 369.26 | 0.149289 | -308.552779 | -809713.4 | 11.92 | 6.80  | 0.68 |
| 41 | HB <sup>i</sup>    | C <sub>2</sub>  | 354.51 | 0.149677 | -308.554824 | -809717.7 | 7.57  | 6.84  | 0.67 |
| 42 | F                  | C <sub>1</sub>  | 371.19 | 0.149285 | -308.552529 | -809712.7 | 12.56 | 6.87  | 0.66 |
| 43 | F-lin              | C <sub>2</sub>  | 363.47 | 0.149257 | -308.553358 | -809715.0 | 10.32 | 6.92  | 0.65 |
| 44 | F-lin              | C <sub>2</sub>  | 363.05 | 0.149190 | -308.553307 | -809715.0 | 10.27 | 7.01  | 0.63 |
| 45 | F                  | C <sub>1</sub>  | 371.04 | 0.149269 | -308.552470 | -809712.6 | 12.68 | 7.03  | 0.62 |
| 46 | F                  | C <sub>1</sub>  | 369.58 | 0.149208 | -308.552573 | -809713.0 | 12.25 | 7.03  | 0.62 |
| 47 | F-lin              | C <sub>2</sub>  | 362.65 | 0.149211 | -308.553305 | -809714.9 | 10.33 | 7.19  | 0.58 |
| 48 | F                  | C <sub>1</sub>  | 371.16 | 0.149311 | -308.552422 | -809712.4 | 12.91 | 7.23  | 0.58 |
| 49 | HB <sup>i</sup>    | C <sub>1</sub>  | 352.86 | 0.149647 | -308.554832 | -809717.8 | 7.47  | 7.24  | 0.57 |
| 50 | F                  | C <sub>1</sub>  | 371.80 | 0.149265 | -308.552219 | -809712.0 | 13.33 | 7.45  | 0.53 |
| 51 | F                  | C <sub>1</sub>  | 370.04 | 0.149328 | -308.552440 | -809712.4 | 12.91 | 7.56  | 0.50 |
| 52 | F-lin              | C <sub>1</sub>  | 357.37 | 0.149179 | -308.553730 | -809716.1 | 9.13  | 7.56  | 0.50 |
| 53 | F                  | C <sub>1</sub>  | 367.79 | 0.149197 | -308.552477 | -809712.8 | 12.47 | 7.79  | 0.46 |
| 54 | F                  | C <sub>1</sub>  | 371.25 | 0.149314 | -308.552123 | -809711.6 | 13.71 | 7.99  | 0.42 |
| 55 | F                  | C <sub>2</sub>  | 366.32 | 0.149230 | -308.552487 | -809712.8 | 12.53 | 8.29  | 0.38 |
| 56 | F                  | C <sub>1</sub>  | 372.28 | 0.149273 | -308.551775 | -809710.8 | 14.51 | 8.49  | 0.35 |
| 57 | F                  | C <sub>1</sub>  | 369.51 | 0.149243 | -308.552057 | -809711.6 | 13.69 | 8.50  | 0.34 |
| 58 | F                  | C <sub>1</sub>  | 367.01 | 0.149219 | -308.552025 | -809711.6 | 13.72 | 9.27  | 0.25 |
| 59 | F                  | C <sub>1</sub>  | 366.35 | 0.149238 | -308.552116 | -809711.8 | 13.53 | 9.27  | 0.25 |
| 60 | F                  | C <sub>2</sub>  | 364.69 | 0.149331 | -308.552324 | -809712.1 | 13.22 | 9.47  | 0.23 |
| 61 | F                  | C <sub>2</sub>  | 366.15 | 0.149309 | -308.551995 | -809711.3 | 14.03 | 9.84  | 0.20 |
| 62 | F                  | C <sub>2</sub>  | 363.15 | 0.149269 | -308.552209 | -809711.9 | 13.36 | 10.06 | 0.18 |
| 63 | F                  | C <sub>1</sub>  | 371.80 | 0.149248 | -308.551151 | -809709.2 | 16.09 | 10.21 | 0.17 |
| 64 | F                  | C <sub>1</sub>  | 370.47 | 0.149272 | -308.550927 | -809708.5 | 16.74 | 11.26 | 0.11 |
| 65 | F                  | C <sub>1</sub>  | 368.85 | 0.149167 | -308.550308 | -809707.2 | 18.09 | 13.09 | 0.05 |

**1,5-pentanediol**

Relative population of conformers: <sup>h</sup> 11% of HB, 79% of F-lin and 10% of F

|    |       |                |        |          |             |           |      |      |       |
|----|-------|----------------|--------|----------|-------------|-----------|------|------|-------|
| 1  | F-lin | C <sub>1</sub> | 401.03 | 0.178654 | -347.812968 | -912713.9 | 2.84 | 0.00 | 10.92 |
| 2  | F-lin | C <sub>1</sub> | 403.00 | 0.178645 | -347.812630 | -912713.0 | 3.71 | 0.28 | 9.76  |
| 3  | F-lin | C <sub>2</sub> | 396.75 | 0.178580 | -347.813071 | -912714.4 | 2.38 | 0.81 | 7.87  |
| 4  | F-lin | C <sub>1</sub> | 402.21 | 0.178561 | -347.812419 | -912712.7 | 4.04 | 0.85 | 7.75  |
| 5  | F-lin | C <sub>1</sub> | 399.51 | 0.178665 | -347.812683 | -912713.1 | 3.62 | 1.23 | 6.65  |
| 6  | F-lin | C <sub>1</sub> | 400.43 | 0.178661 | -347.812559 | -912712.8 | 3.94 | 1.28 | 6.53  |
| 7  | F-lin | C <sub>1</sub> | 402.22 | 0.178663 | -347.812306 | -912712.1 | 4.61 | 1.41 | 6.19  |
| 8  | F-lin | C <sub>1</sub> | 402.48 | 0.178692 | -347.812183 | -912711.7 | 5.01 | 1.73 | 5.44  |
| 9  | F-lin | C <sub>1</sub> | 402.52 | 0.178682 | -347.812072 | -912711.5 | 5.27 | 1.98 | 4.91  |
| 10 | HB    | C <sub>1</sub> | 381.60 | 0.179314 | -347.814712 | -912716.7 | 0.00 | 2.95 | 3.32  |
| 11 | F     | C <sub>1</sub> | 402.13 | 0.178735 | -347.811716 | -912710.4 | 6.34 | 3.17 | 3.04  |
| 12 | F-lin | C <sub>s</sub> | 399.36 | 0.178737 | -347.812011 | -912711.2 | 5.58 | 3.23 | 2.97  |
| 13 | F     | C <sub>1</sub> | 399.61 | 0.178753 | -347.811992 | -912711.1 | 5.67 | 3.25 | 2.95  |
| 14 | F-lin | C <sub>2</sub> | 398.07 | 0.178723 | -347.812108 | -912711.5 | 5.28 | 3.32 | 2.86  |
| 15 | F     | C <sub>1</sub> | 399.69 | 0.178787 | -347.811986 | -912711.0 | 5.77 | 3.33 | 2.85  |
| 16 | F-lin | C <sub>2</sub> | 395.01 | 0.178592 | -347.812198 | -912712.0 | 4.71 | 3.66 | 2.50  |
| 17 | F-lin | C <sub>2</sub> | 395.38 | 0.178659 | -347.812135 | -912711.7 | 5.04 | 3.89 | 2.28  |
| 18 | F-lin | C <sub>s</sub> | 397.02 | 0.178625 | -347.811907 | -912711.2 | 5.56 | 3.91 | 2.26  |
| 19 | HB    | C <sub>1</sub> | 382.55 | 0.179151 | -347.814024 | -912715.4 | 1.38 | 4.04 | 2.14  |
| 20 | HB    | C <sub>1</sub> | 382.42 | 0.179277 | -347.813670 | -912714.1 | 2.64 | 5.34 | 1.27  |
| 21 | HB    | C <sub>1</sub> | 375.89 | 0.179384 | -347.814351 | -912715.6 | 1.13 | 5.78 | 1.06  |
| 22 | F     | C <sub>1</sub> | 399.23 | 0.178681 | -347.810864 | -912708.3 | 8.44 | 6.13 | 0.92  |
| 23 | HB    | C <sub>1</sub> | 377.93 | 0.179301 | -347.813753 | -912714.3 | 2.48 | 6.53 | 0.78  |
| 24 | F     | C <sub>1</sub> | 399.11 | 0.178627 | -347.810670 | -912707.9 | 8.81 | 6.54 | 0.78  |

|                                                                                    |       |                 |        |          |             |            |      |       |      |
|------------------------------------------------------------------------------------|-------|-----------------|--------|----------|-------------|------------|------|-------|------|
| 25                                                                                 | HB    | C <sub>1</sub>  | 376.99 | 0.179281 | -347.813740 | -912714.3  | 2.46 | 6.79  | 0.71 |
| 26                                                                                 | HB    | C <sub>1</sub>  | 383.48 | 0.179209 | -347.812583 | -912711.4  | 5.31 | 7.70  | 0.49 |
| 27                                                                                 | HB    | C <sub>1</sub>  | 376.94 | 0.179463 | -347.813456 | -912713.0  | 3.69 | 8.03  | 0.43 |
| 28                                                                                 | HB    | C <sub>1</sub>  | 378.47 | 0.179317 | -347.812550 | -912711.1  | 5.68 | 9.57  | 0.23 |
| 29                                                                                 | HB    | C <sub>1</sub>  | 377.97 | 0.179218 | -347.812238 | -912710.5  | 6.24 | 10.28 | 0.17 |
| <b>1,6-hexanediol</b>                                                              |       |                 |        |          |             |            |      |       |      |
| Relative population of conformers: <sup>h</sup> 2% of HB, 91% of F-lin and 7% of F |       |                 |        |          |             |            |      |       |      |
| 1                                                                                  | F-lin | C <sub>1</sub>  | 435.77 | 0.208102 | -387.071429 | -1015709.7 | 2.96 | 0.00  | 7.09 |
| 2                                                                                  | F-lin | C <sub>1</sub>  | 434.12 | 0.208068 | -387.071520 | -1015710.0 | 2.63 | 0.16  | 6.64 |
| 3                                                                                  | F-lin | C <sub>1</sub>  | 435.75 | 0.208094 | -387.071305 | -1015709.4 | 3.26 | 0.31  | 6.25 |
| 4                                                                                  | F-lin | C <sub>1</sub>  | 434.09 | 0.208034 | -387.071427 | -1015709.8 | 2.78 | 0.33  | 6.21 |
| 5                                                                                  | F-lin | C <sub>1</sub>  | 434.10 | 0.208034 | -387.071419 | -1015709.8 | 2.80 | 0.35  | 6.17 |
| 6                                                                                  | F-lin | C <sub>1</sub>  | 434.06 | 0.208064 | -387.071404 | -1015709.7 | 2.92 | 0.48  | 5.85 |
| 7                                                                                  | F-lin | C <sub>1</sub>  | 437.23 | 0.208126 | -387.070959 | -1015708.4 | 4.25 | 0.86  | 5.01 |
| 8                                                                                  | F-lin | C <sub>1</sub>  | 436.13 | 0.208060 | -387.070954 | -1015708.5 | 4.09 | 1.03  | 4.68 |
| 9                                                                                  | F-lin | C <sub>1</sub>  | 435.29 | 0.208112 | -387.071099 | -1015708.8 | 3.85 | 1.03  | 4.67 |
| 10                                                                                 | F-lin | C <sub>i</sub>  | 429.09 | 0.208017 | -387.071703 | -1015710.6 | 2.02 | 1.05  | 4.64 |
| 11                                                                                 | F-lin | C <sub>2</sub>  | 429.36 | 0.207989 | -387.071475 | -1015710.1 | 2.54 | 1.49  | 3.88 |
| 12                                                                                 | F-lin | C <sub>1</sub>  | 434.81 | 0.208111 | -387.070970 | -1015708.4 | 4.18 | 1.52  | 3.85 |
| 13                                                                                 | F-lin | C <sub>1</sub>  | 433.68 | 0.208071 | -387.071053 | -1015708.8 | 3.86 | 1.53  | 3.83 |
| 14                                                                                 | F-lin | C <sub>1</sub>  | 433.30 | 0.208077 | -387.071072 | -1015708.8 | 3.83 | 1.61  | 3.71 |
| 15                                                                                 | F-lin | C <sub>1</sub>  | 434.84 | 0.208157 | -387.070953 | -1015708.3 | 4.35 | 1.67  | 3.62 |
| 16                                                                                 | F-lin | C <sub>1</sub>  | 434.73 | 0.208150 | -387.070901 | -1015708.2 | 4.47 | 1.82  | 3.40 |
| 17                                                                                 | F-lin | C <sub>2</sub>  | 427.52 | 0.208046 | -387.071209 | -1015709.2 | 3.39 | 2.89  | 2.21 |
| 18                                                                                 | F     | C <sub>1</sub>  | 433.47 | 0.208198 | -387.070661 | -1015707.4 | 5.22 | 2.95  | 2.15 |
| 19                                                                                 | F     | C <sub>1</sub>  | 433.37 | 0.208229 | -387.070665 | -1015707.3 | 5.30 | 3.06  | 2.07 |
| 20                                                                                 | F     | C <sub>1</sub>  | 432.86 | 0.208200 | -387.070662 | -1015707.4 | 5.23 | 3.14  | 2.00 |
| 21                                                                                 | F-lin | C <sub>i</sub>  | 430.65 | 0.208172 | -387.070856 | -1015708.0 | 4.64 | 3.21  | 1.94 |
| 22                                                                                 | F-lin | C <sub>i</sub>  | 428.29 | 0.208111 | -387.071050 | -1015708.6 | 3.97 | 3.25  | 1.91 |
| 23                                                                                 | F-lin | C <sub>2</sub>  | 430.69 | 0.208168 | -387.070806 | -1015707.9 | 4.77 | 3.32  | 1.85 |
| 24                                                                                 | F-lin | C <sub>2</sub>  | 428.07 | 0.208101 | -387.070998 | -1015708.5 | 4.08 | 3.42  | 1.78 |
| 25                                                                                 | F-lin | C <sub>2h</sub> | 426.51 | 0.208086 | -387.071090 | -1015708.8 | 3.80 | 3.61  | 1.65 |
| 26                                                                                 | HB    | C <sub>1</sub>  | 405.05 | 0.209101 | -387.073554 | -1015712.6 | 0.00 | 6.20  | 0.58 |
| 27                                                                                 | HB    | C <sub>1</sub>  | 406.21 | 0.208987 | -387.073106 | -1015711.7 | 0.88 | 6.74  | 0.47 |
| 28                                                                                 | F     | C <sub>1</sub>  | 431.67 | 0.208098 | -387.069160 | -1015703.7 | 8.90 | 7.17  | 0.39 |
| 29                                                                                 | HB    | C <sub>1</sub>  | 407.73 | 0.208934 | -387.072646 | -1015710.7 | 1.95 | 7.35  | 0.37 |
| 30                                                                                 | HB    | C <sub>1</sub>  | 411.53 | 0.208762 | -387.071805 | -1015708.9 | 3.70 | 7.97  | 0.28 |
| 31                                                                                 | HB    | C <sub>1</sub>  | 410.59 | 0.208675 | -387.071462 | -1015708.2 | 4.37 | 8.92  | 0.19 |
| 32                                                                                 | HB    | C <sub>1</sub>  | 406.38 | 0.208862 | -387.072117 | -1015709.5 | 3.15 | 8.95  | 0.19 |
| 33                                                                                 | HB    | C <sub>1</sub>  | 404.46 | 0.208921 | -387.072148 | -1015709.4 | 3.22 | 9.60  | 0.15 |
| 34                                                                                 | HB    | C <sub>1</sub>  | 406.53 | 0.208851 | -387.071715 | -1015708.4 | 4.17 | 9.94  | 0.13 |
| 35                                                                                 | HB    | C <sub>1</sub>  | 408.49 | 0.208864 | -387.071207 | -1015707.1 | 5.54 | 10.72 | 0.09 |
| 36                                                                                 | HB    | C <sub>1</sub>  | 404.28 | 0.208984 | -387.071668 | -1015708.0 | 4.64 | 11.08 | 0.08 |
| <b>1,7-heptanediol</b>                                                             |       |                 |        |          |             |            |      |       |      |
| Relative population of conformers: <sup>h</sup> 5% of HB, 87% of F-lin and 8% of F |       |                 |        |          |             |            |      |       |      |
| 1                                                                                  | F-lin | C <sub>1</sub>  | 466.76 | 0.237518 | -426.330223 | -1118706.4 | 6.23 | 0.00  | 8.10 |
| 2                                                                                  | F-lin | C <sub>1</sub>  | 468.19 | 0.237548 | -426.330081 | -1118705.9 | 6.68 | 0.03  | 8.01 |
| 3                                                                                  | F-lin | C <sub>1</sub>  | 466.74 | 0.237509 | -426.330168 | -1118706.3 | 6.35 | 0.13  | 7.70 |
| 4                                                                                  | F-lin | C <sub>1</sub>  | 467.13 | 0.237457 | -426.329999 | -1118706.0 | 6.65 | 0.32  | 7.13 |
| 5                                                                                  | F-lin | C <sub>1</sub>  | 466.73 | 0.237471 | -426.330035 | -1118706.0 | 6.60 | 0.38  | 6.95 |
| 6                                                                                  | F-lin | C <sub>1</sub>  | 468.61 | 0.237517 | -426.329799 | -1118705.3 | 7.34 | 0.56  | 6.46 |
| 7                                                                                  | F-lin | C <sub>1</sub>  | 469.96 | 0.237569 | -426.329675 | -1118704.8 | 7.80 | 0.62  | 6.31 |
| 8                                                                                  | F-lin | C <sub>1</sub>  | 467.82 | 0.237553 | -426.329770 | -1118705.1 | 7.51 | 0.96  | 5.49 |
| 9                                                                                  | F-lin | C <sub>2</sub>  | 461.78 | 0.237456 | -426.330322 | -1118706.8 | 5.80 | 1.06  | 5.28 |
| 10                                                                                 | F-lin | C <sub>1</sub>  | 467.53 | 0.237558 | -426.329701 | -1118704.9 | 7.70 | 1.25  | 4.89 |
| 11                                                                                 | F-lin | C <sub>1</sub>  | 465.85 | 0.237534 | -426.329865 | -1118705.4 | 7.21 | 1.25  | 4.89 |
| 12                                                                                 | F-lin | C <sub>1</sub>  | 465.71 | 0.237528 | -426.329872 | -1118705.5 | 7.17 | 1.26  | 4.87 |
| 13                                                                                 | F-lin | C <sub>1</sub>  | 467.20 | 0.237602 | -426.329654 | -1118704.7 | 7.94 | 1.58  | 4.28 |
| 14                                                                                 | HB    | C <sub>1</sub>  | 437.58 | 0.238391 | -426.333468 | -1118712.6 | 0.00 | 2.47  | 2.99 |
| 15                                                                                 | F-lin | C <sub>2</sub>  | 463.29 | 0.237617 | -426.329598 | -1118704.5 | 8.13 | 2.94  | 2.48 |
| 16                                                                                 | F     | C <sub>1</sub>  | 465.95 | 0.237633 | -426.329280 | -1118703.6 | 9.01 | 3.02  | 2.40 |
| 17                                                                                 | F-lin | C <sub>s</sub>  | 461.20 | 0.237478 | -426.329647 | -1118705.0 | 7.63 | 3.07  | 2.35 |
| 18                                                                                 | F     | C <sub>1</sub>  | 465.75 | 0.237634 | -426.329272 | -1118703.6 | 9.03 | 3.10  | 2.32 |

|                                                                                                              |       |                |        |          |             |            |      |       |      |
|--------------------------------------------------------------------------------------------------------------|-------|----------------|--------|----------|-------------|------------|------|-------|------|
| 19                                                                                                           | F-lin | C <sub>s</sub> | 460.61 | 0.237552 | -426.329726 | -1118705.0 | 7.62 | 3.23  | 2.20 |
| 20                                                                                                           | F     | C <sub>1</sub> | 464.46 | 0.237587 | -426.329034 | -1118703.1 | 9.53 | 3.99  | 1.62 |
| 21                                                                                                           | F     | C <sub>1</sub> | 464.46 | 0.237578 | -426.328947 | -1118702.9 | 9.74 | 4.19  | 1.49 |
| 22                                                                                                           | HB    | C <sub>1</sub> | 431.57 | 0.238405 | -426.332529 | -1118710.1 | 2.50 | 6.77  | 0.53 |
| 23                                                                                                           | HB    | C <sub>1</sub> | 435.70 | 0.238370 | -426.331623 | -1118707.8 | 4.79 | 7.82  | 0.35 |
| 24                                                                                                           | HB    | C <sub>1</sub> | 431.09 | 0.238443 | -426.331687 | -1118707.8 | 4.81 | 9.22  | 0.20 |
| 25                                                                                                           | HB    | C <sub>1</sub> | 430.75 | 0.238330 | -426.331529 | -1118707.7 | 4.93 | 9.44  | 0.18 |
| 26                                                                                                           | HB    | C <sub>1</sub> | 433.67 | 0.238305 | -426.331149 | -1118706.8 | 5.86 | 9.50  | 0.18 |
| 27                                                                                                           | HB    | C <sub>1</sub> | 431.46 | 0.238329 | -426.331327 | -1118707.2 | 5.46 | 9.76  | 0.16 |
| 28                                                                                                           | HB    | C <sub>1</sub> | 429.47 | 0.238331 | -426.331316 | -1118707.1 | 5.49 | 10.38 | 0.12 |
| 29                                                                                                           | HB    | C <sub>1</sub> | 431.57 | 0.238267 | -426.330737 | -1118705.8 | 6.84 | 11.11 | 0.09 |
| <b>1,8-octanediol</b>                                                                                        |       |                |        |          |             |            |      |       |      |
| Relative population of conformers: <sup>h</sup> 3% of HB and 77% of F-lin (F conformers were not considered) |       |                |        |          |             |            |      |       |      |
| 1                                                                                                            | F-lin | C <sub>1</sub> | 499.30 | 0.266952 | -465.588876 | -1221702.7 | 4.63 | 0.00  | 8.41 |
| 2                                                                                                            | F-lin | C <sub>1</sub> | 499.49 | 0.266952 | -465.588822 | -1221702.6 | 4.77 | 0.08  | 8.13 |
| 3                                                                                                            | F-lin | C <sub>1</sub> | 499.77 | 0.266907 | -465.588744 | -1221702.5 | 4.86 | 0.09  | 8.11 |
| 4                                                                                                            | F-lin | C <sub>1</sub> | 500.51 | 0.266996 | -465.588746 | -1221702.3 | 5.08 | 0.10  | 8.09 |
| 5                                                                                                            | F-lin | C <sub>1</sub> | 502.43 | 0.267013 | -465.588376 | -1221701.2 | 6.10 | 0.54  | 6.77 |
| 6                                                                                                            | F-lin | C <sub>1</sub> | 500.56 | 0.266994 | -465.588512 | -1221701.6 | 5.69 | 0.69  | 6.37 |
| 7                                                                                                            | F-lin | C <sub>1</sub> | 500.72 | 0.266953 | -465.588396 | -1221701.4 | 5.89 | 0.84  | 6.00 |
| 8                                                                                                            | F-lin | C <sub>i</sub> | 494.79 | 0.266889 | -465.589000 | -1221703.2 | 4.14 | 0.85  | 5.96 |
| 9                                                                                                            | F-lin | C <sub>1</sub> | 497.31 | 0.266941 | -465.588713 | -1221702.3 | 5.03 | 0.99  | 5.64 |
| 10                                                                                                           | F-lin | C <sub>1</sub> | 498.96 | 0.266966 | -465.588512 | -1221701.7 | 5.62 | 1.09  | 5.41 |
| 11                                                                                                           | F-lin | C <sub>1</sub> | 499.95 | 0.267005 | -465.588387 | -1221701.3 | 6.05 | 1.23  | 5.12 |
| 12                                                                                                           | F-lin | C <sub>1</sub> | 500.07 | 0.267035 | -465.588391 | -1221701.2 | 6.12 | 1.26  | 5.06 |
| 13                                                                                                           | F-lin | C <sub>1</sub> | 499.81 | 0.267046 | -465.588419 | -1221701.3 | 6.07 | 1.29  | 4.99 |
| 14                                                                                                           | F-lin | C <sub>1</sub> | 498.09 | 0.266981 | -465.588502 | -1221701.7 | 5.68 | 1.42  | 4.74 |
| 15                                                                                                           | F-lin | C <sub>2</sub> | 493.33 | 0.266931 | -465.588491 | -1221701.8 | 5.58 | 2.74  | 2.79 |
| 16                                                                                                           | F-lin | C <sub>i</sub> | 493.33 | 0.266928 | -465.588484 | -1221701.7 | 5.59 | 2.75  | 2.78 |
| 17                                                                                                           | F-lin | C <sub>i</sub> | 495.85 | 0.267062 | -465.588303 | -1221700.9 | 6.42 | 2.82  | 2.69 |
| 18                                                                                                           | HB    | C <sub>1</sub> | 470.18 | 0.267838 | -465.591472 | -1221707.2 | 0.14 | 4.19  | 1.55 |
| 19                                                                                                           | HB    | C <sub>1</sub> | 461.99 | 0.267957 | -465.591643 | -1221707.3 | 0.00 | 6.50  | 0.61 |
| 20                                                                                                           | HB    | C <sub>1</sub> | 467.11 | 0.267863 | -465.590344 | -1221704.2 | 3.16 | 8.13  | 0.32 |
| 21                                                                                                           | HB    | C <sub>2</sub> | 474.61 | 0.267667 | -465.589091 | -1221701.4 | 5.94 | 8.68  | 0.25 |
| 22                                                                                                           | HB    | C <sub>1</sub> | 460.01 | 0.267880 | -465.590325 | -1221704.1 | 3.26 | 10.35 | 0.13 |
| 23                                                                                                           | HB    | C <sub>1</sub> | 459.73 | 0.267931 | -465.590149 | -1221703.5 | 3.85 | 11.02 | 0.10 |
| <b>1,9-nonanediol</b>                                                                                        |       |                |        |          |             |            |      |       |      |
| Relative population of conformers: <sup>h</sup> 9% of HB and 91% of F-lin (F conformers were not considered) |       |                |        |          |             |            |      |       |      |
| 1                                                                                                            | F-lin | C <sub>1</sub> | 533.99 | 0.296381 | -504.847414 | -1324698.7 | 8.02 | 0.00  | 9.21 |
| 2                                                                                                            | F-lin | C <sub>1</sub> | 532.24 | 0.296396 | -504.847555 | -1324699.1 | 7.69 | 0.19  | 8.53 |
| 3                                                                                                            | F-lin | C <sub>1</sub> | 533.34 | 0.296433 | -504.847414 | -1324698.6 | 8.16 | 0.33  | 8.06 |
| 4                                                                                                            | F-lin | C <sub>1</sub> | 533.17 | 0.296434 | -504.847382 | -1324698.5 | 8.24 | 0.47  | 7.62 |
| 5                                                                                                            | F-lin | C <sub>1</sub> | 535.20 | 0.296454 | -504.847074 | -1324697.7 | 9.10 | 0.72  | 6.88 |
| 6                                                                                                            | F-lin | C <sub>1</sub> | 533.52 | 0.296430 | -504.847190 | -1324698.0 | 8.73 | 0.86  | 6.52 |
| 7                                                                                                            | F-lin | C <sub>s</sub> | 527.48 | 0.296316 | -504.847602 | -1324699.4 | 7.35 | 1.28  | 5.50 |
| 8                                                                                                            | F-lin | C <sub>1</sub> | 532.90 | 0.296478 | -504.847127 | -1324697.7 | 9.03 | 1.33  | 5.38 |
| 9                                                                                                            | F-lin | C <sub>1</sub> | 531.25 | 0.296411 | -504.847230 | -1324698.2 | 8.58 | 1.38  | 5.28 |
| 10                                                                                                           | F-lin | C <sub>1</sub> | 531.10 | 0.296409 | -504.847230 | -1324698.2 | 8.58 | 1.42  | 5.19 |
| 11                                                                                                           | F-lin | C <sub>1</sub> | 532.61 | 0.296450 | -504.847087 | -1324697.7 | 9.06 | 1.45  | 5.13 |
| 12                                                                                                           | F-lin | C <sub>1</sub> | 532.51 | 0.296485 | -504.847107 | -1324697.7 | 9.10 | 1.52  | 4.99 |
| 13                                                                                                           | HB    | C <sub>1</sub> | 500.04 | 0.297311 | -504.851398 | -1324706.8 | 0.00 | 2.10  | 3.94 |
| 14                                                                                                           | HB    | C <sub>1</sub> | 500.37 | 0.297427 | -504.851159 | -1324705.8 | 0.93 | 2.94  | 2.82 |
| 15                                                                                                           | F-lin | C <sub>2</sub> | 528.64 | 0.296507 | -504.847009 | -1324697.3 | 9.41 | 2.99  | 2.76 |
| 16                                                                                                           | F-lin | C <sub>2</sub> | 525.95 | 0.296450 | -504.847239 | -1324698.1 | 8.66 | 3.04  | 2.71 |
| 17                                                                                                           | F-lin | C <sub>s</sub> | 526.04 | 0.296359 | -504.847077 | -1324697.9 | 8.84 | 3.20  | 2.54 |
| 18                                                                                                           | F-lin | C <sub>s</sub> | 525.58 | 0.296443 | -504.847213 | -1324698.0 | 8.71 | 3.20  | 2.53 |
| 19                                                                                                           | F-lin | C <sub>2</sub> | 525.92 | 0.296366 | -504.847088 | -1324697.9 | 8.84 | 3.22  | 2.51 |
| 20                                                                                                           | HB    | C <sub>1</sub> | 490.50 | 0.297326 | -504.850231 | -1324703.7 | 3.10 | 8.05  | 0.36 |
| 21                                                                                                           | HB    | C <sub>1</sub> | 485.39 | 0.297664 | -504.851031 | -1324704.9 | 1.89 | 8.36  | 0.32 |
| 22                                                                                                           | HB    | C <sub>1</sub> | 493.19 | 0.297370 | -504.849840 | -1324702.5 | 4.25 | 8.39  | 0.31 |
| 23                                                                                                           | HB    | C <sub>1</sub> | 490.13 | 0.297539 | -504.850239 | -1324703.1 | 3.64 | 8.70  | 0.28 |
| 24                                                                                                           | HB    | C <sub>1</sub> | 486.47 | 0.297550 | -504.850592 | -1324704.0 | 2.74 | 8.89  | 0.25 |
| 25                                                                                                           | HB    | C <sub>1</sub> | 499.28 | 0.297265 | -504.848545 | -1324699.4 | 7.37 | 9.70  | 0.18 |

|                                                                                                               |       |                |        |          |              |             |      |       |      |
|---------------------------------------------------------------------------------------------------------------|-------|----------------|--------|----------|--------------|-------------|------|-------|------|
| 26                                                                                                            | HB    | C <sub>1</sub> | 490.13 | 0.297370 | -504.849266  | -1324701.0  | 5.75 | 10.81 | 0.12 |
| 27                                                                                                            | HB    | C <sub>1</sub> | 492.87 | 0.297268 | -504.848636  | -1324699.6  | 7.14 | 11.38 | 0.09 |
| <b>1,10-decanediol</b>                                                                                        |       |                |        |          |              |             |      |       |      |
| Relative population of conformers: <sup>h</sup> 16% of HB and 84% of F-lin (F conformers were not considered) |       |                |        |          |              |             |      |       |      |
| 1                                                                                                             | F-lin | C1             | 565.14 | 0.325831 | -544.1062206 | -1427695.41 | 8.51 | 0.00  | 0.19 |
| 2                                                                                                             | F-lin | C1             | 564.63 | 0.325796 | -544.1060894 | -1427695.16 | 8.77 | 0.41  | 0.16 |
| 3                                                                                                             | F-lin | C1             | 566.70 | 0.325836 | -544.1057838 | -1427694.25 | 9.67 | 0.69  | 0.14 |
| 4                                                                                                             | F-lin | C1             | 565.75 | 0.325924 | -544.1058140 | -1427694.10 | 9.82 | 1.13  | 0.12 |
| 5                                                                                                             | F-lin | C1             | 565.32 | 0.325886 | -544.1057742 | -1427694.10 | 9.83 | 1.26  | 0.11 |
| 6                                                                                                             | F-lin | Ci             | 559.75 | 0.325811 | -544.1058352 | -1427694.45 | 9.47 | 2.57  | 0.07 |
| 7                                                                                                             | F-lin | Ci             | 558.66 | 0.325903 | -544.1059564 | -1427694.53 | 9.40 | 2.81  | 0.06 |
| 8                                                                                                             | HB    | C1             | 528.50 | 0.326985 | -544.1095370 | -1427701.09 | 2.84 | 5.25  | 0.02 |
| 9                                                                                                             | HB    | C1             | 520.04 | 0.326875 | -544.1100263 | -1427702.66 | 1.26 | 6.20  | 0.02 |
| 10                                                                                                            | HB    | C1             | 516.80 | 0.327007 | -544.1104856 | -1427703.52 | 0.40 | 6.30  | 0.01 |
| 11                                                                                                            | HB    | C1             | 523.29 | 0.326720 | -544.1093150 | -1427701.20 | 2.72 | 6.69  | 0.01 |
| 12                                                                                                            | HB    | C1             | 514.16 | 0.327099 | -544.1107309 | -1427703.93 | 0.00 | 6.69  | 0.01 |
| 13                                                                                                            | HB    | C1             | 525.42 | 0.326810 | -544.1091363 | -1427700.50 | 3.43 | 6.76  | 0.01 |
| 14                                                                                                            | HB    | C1             | 519.92 | 0.326889 | -544.1097037 | -1427701.78 | 2.15 | 7.12  | 0.01 |
| 15                                                                                                            | HB    | C1             | 527.28 | 0.326963 | -544.1088561 | -1427699.36 | 4.57 | 7.34  | 0.01 |
| 16                                                                                                            | HB    | C1             | 515.89 | 0.326851 | -544.1099846 | -1427702.62 | 1.31 | 7.48  | 0.01 |
| 17                                                                                                            | HB    | C1             | 519.01 | 0.327076 | -544.1096792 | -1427701.22 | 2.70 | 7.94  | 0.01 |
| 18                                                                                                            | HB    | C1             | 515.50 | 0.327129 | -544.1100296 | -1427702.01 | 1.92 | 8.21  | 0.01 |
| 19                                                                                                            | HB    | C1             | 513.86 | 0.327026 | -544.1100756 | -1427702.40 | 1.53 | 8.31  | 0.01 |
| 20                                                                                                            | HB    | C1             | 516.45 | 0.327039 | -544.1097238 | -1427701.44 | 2.49 | 8.49  | 0.01 |
| 21                                                                                                            | HB    | C1             | 519.11 | 0.327008 | -544.1092638 | -1427700.31 | 3.61 | 8.83  | 0.01 |
| 22                                                                                                            | HB    | C1             | 516.14 | 0.327028 | -544.1092626 | -1427700.26 | 3.67 | 9.77  | 0.00 |
| 23                                                                                                            | HB    | C1             | 511.22 | 0.327025 | -544.1095464 | -1427701.01 | 2.92 | 10.48 | 0.00 |
| 24                                                                                                            | HB    | C1             | 512.20 | 0.327237 | -544.1095656 | -1427700.50 | 3.42 | 10.69 | 0.00 |
| 25                                                                                                            | HB    | C1             | 520.58 | 0.326842 | -544.1073811 | -1427695.81 | 8.12 | 12.90 | 0.00 |

<sup>a</sup> Conformers are given in ascending Gibbs free energy order.

<sup>b</sup> HB are the O–H···O–H hydrogen bonded conformers, F are the conformers with free hydroxyl groups and F-lin are the conformers with free hydroxyl groups and linear carbon backbone.

<sup>c</sup> Entropy was calculated at B3LYP-D3(BJ)/def2-TZVPP level, the vibrational frequencies were scaled by a factor of 0.9657 (see Section 2.2 for details).

<sup>d</sup> Thermal correction [ZPE + ( $H_{298} - H_0$ )] was calculated at B3LYP-D3(BJ)/def2-TZVPP level, the vibrational frequencies were scaled by a factor of 0.9883 (see Section 2.2 for details).

<sup>e</sup> Electronic energy was calculated at the DLPNO-CCSD(T<sub>1</sub>)/CBS//B3LYP-D3(BJ)/def2-TZVPP level of theory.

<sup>f</sup>  $H = E_e + \text{ZPE} + (H_{298} - H_0)$ .

$$p_i = \frac{e^{-\Delta G(i)/RT}}{\sum_i e^{-\Delta G(i)/RT}}$$

<sup>g</sup> Relative populations of the conformers:

<sup>h</sup> Relative population of conformers is obtained for the set of conformers selected below. Only for 1,2-ethanediol and 1,4-butanediol it corresponds to all possible conformers (see text for details)

<sup>i</sup> Conformers of 1,4-butanediol determined from simplified population analysis using only 20 lowest-energy B3LYP/6-31G(d,p) conformers.

**Table S3**Cartesian coordinates of most stable HB and F conformers of  $\alpha,\omega$ -alkanediols calculated at B3LYP-D3(BJ)/def2-TZVPP level (in Å)

| HB conformer                                                                                                                               | x        | y         | z         | F (F-lin) conformer <sup>a</sup> | x                                                                                                                                            | y         | z         |           |           |
|--------------------------------------------------------------------------------------------------------------------------------------------|----------|-----------|-----------|----------------------------------|----------------------------------------------------------------------------------------------------------------------------------------------|-----------|-----------|-----------|-----------|
| <b>1,2-ethanediol, C<sub>2</sub>H<sub>6</sub>O<sub>2</sub></b>                                                                             |          |           |           |                                  |                                                                                                                                              |           |           |           |           |
| 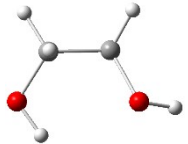 <p>symmetry C<sub>1</sub><br/>r(OH...OH) = 2.372 Å</p>   | C        | -0.730166 | 0.567511  | 0.271925                         |  <p>symmetry C<sub>1</sub></p>                            | C         | -0.574027 | -0.508520 | 0.003726  |
|                                                                                                                                            | H        | -1.275564 | 1.447857  | -0.069061                        |                                                                                                                                              | H         | -0.489646 | -1.116333 | 0.910169  |
|                                                                                                                                            | H        | -0.695850 | 0.590233  | 1.367827                         |                                                                                                                                              | H         | -0.507683 | -1.178532 | -0.852511 |
|                                                                                                                                            | C        | 0.682128  | 0.600135  | -0.269062                        |                                                                                                                                              | C         | 0.567033  | 0.493835  | -0.044630 |
|                                                                                                                                            | H        | 1.192610  | 1.507244  | 0.073992                         |                                                                                                                                              | H         | 0.469653  | 1.200961  | 0.790176  |
|                                                                                                                                            | H        | 0.655549  | 0.600583  | -1.363115                        |                                                                                                                                              | H         | 0.507782  | 1.062954  | -0.977877 |
|                                                                                                                                            | O        | -1.444557 | -0.566557 | -0.189150                        |                                                                                                                                              | O         | -1.840011 | 0.132892  | -0.084642 |
|                                                                                                                                            | H        | -0.896775 | -1.335888 | -0.001033                        |                                                                                                                                              | H         | -2.005164 | 0.609531  | 0.733052  |
|                                                                                                                                            | O        | 1.338520  | -0.572254 | 0.218962                         |                                                                                                                                              | O         | 1.783030  | -0.239524 | 0.047185  |
| H                                                                                                                                          | 2.156555 | -0.705412 | -0.264283 | H                                | 2.522870                                                                                                                                     | 0.362582  | -0.057924 |           |           |
| <b>1,3-propanediol, C<sub>3</sub>H<sub>8</sub>O<sub>2</sub></b>                                                                            |          |           |           |                                  |                                                                                                                                              |           |           |           |           |
|  <p>symmetry C<sub>1</sub><br/>r(OH...OH) = 2.024 Å</p>   | C        | -1.266788 | 0.404302  | 0.291492                         |  <p>symmetry C<sub>2</sub></p>                            | C         | 0.000000  | 1.267717  | 0.147949  |
|                                                                                                                                            | H        | -2.157388 | 0.967576  | 0.010158                         |                                                                                                                                              | H         | -0.109446 | 2.138987  | 0.802867  |
|                                                                                                                                            | H        | -1.178108 | 0.462205  | 1.386200                         |                                                                                                                                              | H         | -0.844180 | 1.249801  | -0.546361 |
|                                                                                                                                            | C        | -0.032248 | 1.033903  | -0.348420                        |                                                                                                                                              | C         | 0.000000  | 0.000000  | 0.981511  |
|                                                                                                                                            | H        | -0.078127 | 0.892906  | -1.430765                        |                                                                                                                                              | H         | 0.881130  | -0.001134 | 1.627369  |
|                                                                                                                                            | H        | -0.039786 | 2.111081  | -0.158985                        |                                                                                                                                              | H         | -0.881130 | 0.001134  | 1.627369  |
|                                                                                                                                            | C        | 1.276533  | 0.479343  | 0.183273                         |                                                                                                                                              | C         | 0.000000  | -1.267717 | 0.147949  |
|                                                                                                                                            | H        | 2.124312  | 0.985106  | -0.289375                        |                                                                                                                                              | H         | 0.844180  | -1.249801 | -0.546361 |
|                                                                                                                                            | H        | 1.337704  | 0.648186  | 1.264410                         |                                                                                                                                              | H         | 0.109446  | -2.138987 | 0.802867  |
|                                                                                                                                            | O        | -1.494048 | -0.931856 | -0.125208                        |                                                                                                                                              | O         | 1.238228  | 1.332383  | -0.563506 |
|                                                                                                                                            | H        | -0.644463 | -1.387551 | -0.089755                        |                                                                                                                                              | H         | 1.190164  | 2.041474  | -1.208054 |
|                                                                                                                                            | O        | 1.326828  | -0.927943 | -0.095218                        |                                                                                                                                              | O         | -1.238228 | -1.332383 | -0.563506 |
| H                                                                                                                                          | 2.108637 | -1.306409 | 0.313448  | H                                | -1.190164                                                                                                                                    | -2.041474 | -1.208054 |           |           |
| <b>1,4-butanediol, C<sub>4</sub>H<sub>10</sub>O<sub>2</sub></b>                                                                            |          |           |           |                                  |                                                                                                                                              |           |           |           |           |
|  <p>symmetry C<sub>1</sub><br/>r(OH...OH) = 1.858 Å</p> | C        | 1.604448  | 0.160821  | 0.313547                         |  <p>symmetry C<sub>1</sub><br/>φ(C-C-C-C) = -178.3°</p> | C         | -1.840103 | 0.633968  | -0.199261 |
|                                                                                                                                            | H        | 2.635507  | 0.464564  | 0.112018                         |                                                                                                                                              | H         | -1.848042 | 0.769399  | -1.281873 |
|                                                                                                                                            | H        | 1.477690  | 0.070962  | 1.397393                         |                                                                                                                                              | H         | -2.352899 | 1.495463  | 0.242580  |
|                                                                                                                                            | C        | 0.652761  | 1.206225  | -0.242534                        |                                                                                                                                              | C         | -0.408092 | 0.560315  | 0.309362  |
|                                                                                                                                            | H        | 1.063570  | 2.179622  | 0.038267                         |                                                                                                                                              | H         | -0.420882 | 0.403487  | 1.394921  |
|                                                                                                                                            | H        | 0.692529  | 1.159309  | -1.334765                        |                                                                                                                                              | H         | 0.074106  | 1.526181  | 0.145782  |
|                                                                                                                                            | C        | -0.804232 | 1.146847  | 0.233972                         |                                                                                                                                              | C         | 0.410071  | -0.541680 | -0.358373 |
|                                                                                                                                            | H        | -1.292390 | 2.074896  | -0.078576                        |                                                                                                                                              | H         | 0.453808  | -0.361589 | -1.436158 |
|                                                                                                                                            | H        | -0.835080 | 1.131003  | 1.327436                         |                                                                                                                                              | H         | -0.087628 | -1.503384 | -0.219480 |
|                                                                                                                                            | C        | -1.649268 | -0.012930 | -0.289407                        |                                                                                                                                              | C         | 1.824953  | -0.646613 | 0.173721  |
|                                                                                                                                            | H        | -1.568206 | -0.059463 | -1.384210                        |                                                                                                                                              | H         | 2.339559  | -1.488507 | -0.302369 |

|                                                                                                                                           |           |           |           |           |                                                                                                                                                                                                                                   |           |           |           |           |
|-------------------------------------------------------------------------------------------------------------------------------------------|-----------|-----------|-----------|-----------|-----------------------------------------------------------------------------------------------------------------------------------------------------------------------------------------------------------------------------------|-----------|-----------|-----------|-----------|
|                                                                                                                                           | H         | -2.696738 | 0.177840  | -0.051741 |                                                                                                                                                                                                                                   | H         | 1.803731  | -0.833584 | 1.254922  |
|                                                                                                                                           | O         | 1.358685  | -1.106509 | -0.318556 |                                                                                                                                                                                                                                   | O         | -2.584441 | -0.561667 | 0.033571  |
|                                                                                                                                           | H         | 1.978257  | -1.755081 | 0.025409  |                                                                                                                                                                                                                                   | H         | -2.666328 | -0.688527 | 0.982772  |
|                                                                                                                                           | O         | -1.340291 | -1.265542 | 0.293527  |                                                                                                                                                                                                                                   | O         | 2.507360  | 0.576868  | -0.105590 |
|                                                                                                                                           | H         | -0.424536 | -1.473022 | 0.055531  |                                                                                                                                                                                                                                   | H         | 3.400253  | 0.523510  | 0.242356  |
| <b>1,5-pentanediol, C<sub>5</sub>H<sub>12</sub>O<sub>2</sub></b>                                                                          |           |           |           |           |                                                                                                                                                                                                                                   |           |           |           |           |
| 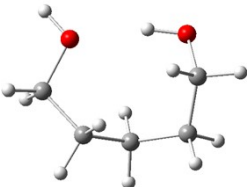 <p>symmetry C<sub>1</sub><br/>r(OH...OH) = 1.966 Å</p>  | C         | 1.724688  | 0.375058  | 0.552957  |  <p>symmetry C<sub>1</sub><br/>φ<sub>1</sub>(C-C-C-C) = -179.9°<br/>φ<sub>2</sub>(C-C-C-C) = -178.0°</p>                                       | C         | 2.498500  | 0.017937  | 0.527290  |
|                                                                                                                                           | H         | 2.771845  | 0.469583  | 0.844635  |                                                                                                                                                                                                                                   | H         | 2.335872  | -0.611027 | 1.411327  |
|                                                                                                                                           | H         | 1.125651  | 0.522508  | 1.458561  |                                                                                                                                                                                                                                   | H         | 3.339224  | 0.676572  | 0.744767  |
|                                                                                                                                           | C         | 1.484022  | -1.019891 | -0.023286 |                                                                                                                                                                                                                                   | C         | 1.250021  | 0.840678  | 0.239123  |
|                                                                                                                                           | H         | 2.219210  | -1.201768 | -0.810774 |                                                                                                                                                                                                                                   | H         | 1.447126  | 1.489878  | -0.618707 |
|                                                                                                                                           | H         | 1.673622  | -1.756764 | 0.764687  |                                                                                                                                                                                                                                   | H         | 1.069251  | 1.495739  | 1.097595  |
|                                                                                                                                           | C         | 0.083088  | -1.224782 | -0.606352 |                                                                                                                                                                                                                                   | C         | 0.005561  | -0.003699 | -0.022240 |
|                                                                                                                                           | H         | 0.034456  | -2.218324 | -1.054362 |                                                                                                                                                                                                                                   | H         | -0.171812 | -0.672348 | 0.823179  |
|                                                                                                                                           | H         | -0.048552 | -0.518666 | -1.428055 |                                                                                                                                                                                                                                   | H         | 0.168008  | -0.639367 | -0.899361 |
|                                                                                                                                           | C         | -2.068482 | 0.018609  | 0.019781  |                                                                                                                                                                                                                                   | C         | -2.491235 | 0.015860  | -0.520045 |
|                                                                                                                                           | H         | -2.475361 | -0.185820 | -0.976490 |                                                                                                                                                                                                                                   | H         | -3.332111 | 0.677888  | -0.754739 |
|                                                                                                                                           | H         | -2.898983 | 0.038676  | 0.732108  |                                                                                                                                                                                                                                   | H         | -2.330357 | -0.642434 | -1.383043 |
|                                                                                                                                           | C         | -1.071024 | -1.056525 | 0.404778  |                                                                                                                                                                                                                                   | C         | -1.244610 | 0.839431  | -0.261381 |
|                                                                                                                                           | H         | -0.683124 | -0.820086 | 1.397820  |                                                                                                                                                                                                                                   | H         | -1.086402 | 1.499793  | -1.118983 |
|                                                                                                                                           | H         | -1.623591 | -1.992132 | 0.510814  |                                                                                                                                                                                                                                   | H         | -1.426056 | 1.483376  | 0.603503  |
|                                                                                                                                           | O         | 1.462999  | 1.411658  | -0.379340 |                                                                                                                                                                                                                                   | O         | 2.919918  | -0.778273 | -0.578304 |
| H                                                                                                                                         | 0.503704  | 1.527670  | -0.405265 | H         | 2.265151                                                                                                                                                                                                                          | -1.464056 | -0.730158 |           |           |
| O                                                                                                                                         | -1.400739 | 1.289514  | 0.022853  | O         | -2.774295                                                                                                                                                                                                                         | -0.754508 | 0.648409  |           |           |
| H                                                                                                                                         | -2.010711 | 1.970926  | -0.269054 | H         | -3.552302                                                                                                                                                                                                                         | -1.293008 | 0.487301  |           |           |
| <b>1,6-hexanediol, C<sub>6</sub>H<sub>14</sub>O<sub>2</sub></b>                                                                           |           |           |           |           |                                                                                                                                                                                                                                   |           |           |           |           |
|  <p>symmetry C<sub>1</sub><br/>r(OH...OH) = 2.027 Å</p> | C         | 2.133332  | 0.501444  | -0.445667 |  <p>symmetry C<sub>1</sub><br/>φ<sub>1</sub>(C-C-C-C) = -179.4°<br/>φ<sub>2</sub>(C-C-C-C) = -179.7°<br/>φ<sub>3</sub>(C-C-C-C) = -178.8°</p> | C         | -3.085256 | 0.310602  | -0.256878 |
|                                                                                                                                           | H         | 1.782683  | 0.465391  | -1.482367 |                                                                                                                                                                                                                                   | H         | -3.072599 | 0.439849  | -1.346415 |
|                                                                                                                                           | H         | 3.192630  | 0.759524  | -0.479927 |                                                                                                                                                                                                                                   | H         | -3.226684 | 1.298656  | 0.183470  |
|                                                                                                                                           | C         | 1.965456  | -0.867808 | 0.222204  |                                                                                                                                                                                                                                   | C         | -1.767623 | -0.288281 | 0.211711  |
|                                                                                                                                           | H         | 2.572071  | -0.893823 | 1.130412  |                                                                                                                                                                                                                                   | H         | -1.806523 | -0.415009 | 1.296664  |
|                                                                                                                                           | H         | 2.370225  | -1.630095 | -0.451716 |                                                                                                                                                                                                                                   | H         | -1.656294 | -1.290793 | -0.216726 |
|                                                                                                                                           | C         | 0.516315  | -1.189374 | 0.594141  |                                                                                                                                                                                                                                   | C         | -0.560282 | 0.562628  | -0.174610 |
|                                                                                                                                           | H         | 0.475220  | -2.151072 | 1.111033  |                                                                                                                                                                                                                                   | H         | -0.541930 | 0.697989  | -1.260872 |
|                                                                                                                                           | H         | 0.200376  | -0.444800 | 1.325275  |                                                                                                                                                                                                                                   | H         | -0.672017 | 1.564128  | 0.254113  |
|                                                                                                                                           | C         | -0.450677 | -1.200329 | -0.594367 |                                                                                                                                                                                                                                   | C         | 0.767688  | -0.038067 | 0.277602  |
|                                                                                                                                           | H         | -0.150718 | -0.450960 | -1.325865 |                                                                                                                                                                                                                                   | H         | 0.752435  | -0.173624 | 1.364183  |
|                                                                                                                                           | H         | -0.389000 | -2.161184 | -1.110395 |                                                                                                                                                                                                                                   | H         | 0.886867  | -1.033178 | -0.154975 |
|                                                                                                                                           | C         | -1.911545 | -0.926147 | -0.226283 |                                                                                                                                                                                                                                   | C         | 1.971369  | 0.819338  | -0.104277 |
|                                                                                                                                           | H         | -2.294778 | -1.705702 | 0.438716  |                                                                                                                                                                                                                                   | H         | 1.883107  | 1.808352  | 0.355313  |
|                                                                                                                                           | H         | -2.517485 | -0.959070 | -1.134412 |                                                                                                                                                                                                                                   | H         | 1.986910  | 0.975408  | -1.186578 |

|                                                                                                                                          |           |           |           |           |                                                                                                                                                                                                                                                                                                                                                 |           |           |           |           |
|------------------------------------------------------------------------------------------------------------------------------------------|-----------|-----------|-----------|-----------|-------------------------------------------------------------------------------------------------------------------------------------------------------------------------------------------------------------------------------------------------------------------------------------------------------------------------------------------------|-----------|-----------|-----------|-----------|
|                                                                                                                                          | C         | -2.132122 | 0.412634  | 0.463308  |                                                                                                                                                                                                                                                                                                                                                 | C         | 3.300237  | 0.219849  | 0.313600  |
|                                                                                                                                          | H         | -1.747192 | 0.390670  | 1.486502  |                                                                                                                                                                                                                                                                                                                                                 | H         | 3.302312  | 0.036349  | 1.395302  |
|                                                                                                                                          | H         | -3.202787 | 0.628341  | 0.513694  |                                                                                                                                                                                                                                                                                                                                                 | H         | 4.111941  | 0.921171  | 0.090047  |
|                                                                                                                                          | O         | 1.483997  | 1.552477  | 0.255890  |                                                                                                                                                                                                                                                                                                                                                 | O         | -4.221813 | -0.448090 | 0.145464  |
|                                                                                                                                          | H         | 0.537827  | 1.516460  | 0.056666  |                                                                                                                                                                                                                                                                                                                                                 | H         | -4.148515 | -1.329989 | -0.229368 |
|                                                                                                                                          | O         | -1.459330 | 1.441897  | -0.280647 |                                                                                                                                                                                                                                                                                                                                                 | O         | 3.488603  | -1.002806 | -0.399685 |
|                                                                                                                                          | H         | -1.750958 | 2.298806  | 0.040432  |                                                                                                                                                                                                                                                                                                                                                 | H         | 4.309880  | -1.408553 | -0.113269 |
| <b>1,7-heptanediol, C<sub>7</sub>H<sub>16</sub>O<sub>2</sub></b>                                                                         |           |           |           |           |                                                                                                                                                                                                                                                                                                                                                 |           |           |           |           |
| 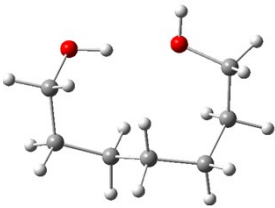 <p>symmetry C<sub>1</sub><br/>r(OH...OH) = 1.964 Å</p> | C         | -2.388793 | 0.525165  | 0.437373  |  <p>symmetry C<sub>1</sub><br/> <math>\phi_1(\text{C-C-C-C}) = -178.4^\circ</math><br/> <math>\phi_2(\text{C-C-C-C}) = -179.8^\circ</math><br/> <math>\phi_3(\text{C-C-C-C}) = 180.0^\circ</math><br/> <math>\phi_4(\text{C-C-C-C}) = 179.0^\circ</math></p> | C         | -3.801103 | -0.075054 | 0.474125  |
|                                                                                                                                          | H         | -3.445972 | 0.746779  | 0.590308  |                                                                                                                                                                                                                                                                                                                                                 | H         | -3.711454 | -0.718729 | 1.358345  |
|                                                                                                                                          | H         | -1.904378 | 0.584581  | 1.418601  |                                                                                                                                                                                                                                                                                                                                                 | H         | -4.654761 | 0.583154  | 0.634997  |
|                                                                                                                                          | C         | -2.243331 | -0.881693 | -0.143015 |                                                                                                                                                                                                                                                                                                                                                 | C         | -2.531621 | 0.747514  | 0.299182  |
|                                                                                                                                          | H         | -2.879658 | -0.956459 | -1.027980 |                                                                                                                                                                                                                                                                                                                                                 | H         | -2.421758 | 1.395005  | 1.175204  |
|                                                                                                                                          | H         | -2.630080 | -1.598635 | 0.589273  |                                                                                                                                                                                                                                                                                                                                                 | H         | -2.655230 | 1.404260  | -0.566249 |
|                                                                                                                                          | C         | -0.808907 | -1.244260 | -0.531386 |                                                                                                                                                                                                                                                                                                                                                 | C         | -1.268995 | -0.094365 | 0.132208  |
|                                                                                                                                          | H         | -0.466333 | -0.518466 | -1.270614 |                                                                                                                                                                                                                                                                                                                                                 | H         | -1.166277 | -0.769427 | 0.988805  |
|                                                                                                                                          | H         | -0.806117 | -2.212205 | -1.040324 |                                                                                                                                                                                                                                                                                                                                                 | H         | -1.363936 | -0.730374 | -0.754181 |
|                                                                                                                                          | C         | 0.168667  | -1.295992 | 0.642605  |                                                                                                                                                                                                                                                                                                                                                 | C         | 0.001194  | 0.741124  | -0.003984 |
|                                                                                                                                          | H         | -0.094294 | -2.139556 | 1.287506  |                                                                                                                                                                                                                                                                                                                                                 | H         | 0.108825  | 1.377742  | 0.880120  |
|                                                                                                                                          | H         | 0.064299  | -0.400159 | 1.254100  |                                                                                                                                                                                                                                                                                                                                                 | H         | -0.105428 | 1.421014  | -0.855692 |
|                                                                                                                                          | C         | 1.632892  | -1.438664 | 0.218413  |                                                                                                                                                                                                                                                                                                                                                 | C         | 1.262679  | -0.099456 | -0.176087 |
|                                                                                                                                          | H         | 1.746187  | -2.350480 | -0.375611 |                                                                                                                                                                                                                                                                                                                                                 | H         | 1.156973  | -0.734401 | -1.062462 |
|                                                                                                                                          | H         | 2.249356  | -1.581086 | 1.111227  |                                                                                                                                                                                                                                                                                                                                                 | H         | 1.373685  | -0.774792 | 0.674451  |
|                                                                                                                                          | C         | 2.214533  | -0.270118 | -0.586743 |                                                                                                                                                                                                                                                                                                                                                 | C         | 2.528271  | 0.743058  | -0.312059 |
|                                                                                                                                          | H         | 1.675163  | -0.134497 | -1.526237 |                                                                                                                                                                                                                                                                                                                                                 | H         | 2.636867  | 1.391872  | 0.561528  |
|                                                                                                                                          | H         | 3.241714  | -0.523219 | -0.862005 |                                                                                                                                                                                                                                                                                                                                                 | H         | 2.444821  | 1.399556  | -1.183380 |
|                                                                                                                                          | C         | 2.263718  | 1.067664  | 0.131235  |                                                                                                                                                                                                                                                                                                                                                 | C         | 3.793296  | 0.080322  | -0.459056 |
|                                                                                                                                          | H         | 2.954673  | 1.737780  | -0.388851 |                                                                                                                                                                                                                                                                                                                                                 | H         | 4.648993  | 0.580377  | -0.637871 |
|                                                                                                                                          | H         | 2.628567  | 0.932396  | 1.155783  |                                                                                                                                                                                                                                                                                                                                                 | H         | 3.701717  | -0.753080 | -1.320962 |
| O                                                                                                                                        | -1.888462 | 1.538049  | -0.422650 | O         | -4.136242                                                                                                                                                                                                                                                                                                                                       | -0.851749 | -0.673737 |           |           |
| H                                                                                                                                        | -0.923128 | 1.512330  | -0.390789 | H         | -3.464389                                                                                                                                                                                                                                                                                                                                       | -1.526974 | -0.795334 |           |           |
| O                                                                                                                                        | 0.957303  | 1.663738  | 0.155950  | O         | 3.986416                                                                                                                                                                                                                                                                                                                                        | -0.830798 | 0.740413  |           |           |
| H                                                                                                                                        | 1.006511  | 2.514057  | 0.599715  | H         | 4.767636                                                                                                                                                                                                                                                                                                                                        | -1.379825 | 0.643295  |           |           |
| <b>1,8-octanediol, C<sub>8</sub>H<sub>18</sub>O<sub>2</sub></b>                                                                          |           |           |           |           |                                                                                                                                                                                                                                                                                                                                                 |           |           |           |           |
|                                                                                                                                          | C         | 2.430668  | -1.278973 | 0.163750  |                                                                                                                                                                                                                                                                                                                                                 | C         | -4.459067 | -0.393154 | -0.289675 |
|                                                                                                                                          | H         | 2.732456  | -1.932897 | 0.987359  |                                                                                                                                                                                                                                                                                                                                                 | H         | -4.462645 | -0.386314 | -1.387062 |
|                                                                                                                                          | H         | 3.274140  | -1.187021 | -0.529201 |                                                                                                                                                                                                                                                                                                                                                 | H         | -5.229917 | -1.092057 | 0.034590  |
|                                                                                                                                          | C         | 2.020819  | 0.081423  | 0.691359  |                                                                                                                                                                                                                                                                                                                                                 | C         | -3.097069 | -0.841471 | 0.222862  |
|                                                                                                                                          | H         | 2.803670  | 0.453021  | 1.357007  |                                                                                                                                                                                                                                                                                                                                                 | H         | -3.125520 | -0.871780 | 1.315451  |
|                                                                                                                                          | H         | 1.135926  | -0.066863 | 1.312255  |                                                                                                                                                                                                                                                                                                                                                 | H         | -2.925467 | -1.867607 | -0.118136 |
|                                                                                                                                          | C         | 1.739102  | 1.098773  | -0.420281 |                                                                                                                                                                                                                                                                                                                                                 | C         | -1.941683 | 0.043432  | -0.238782 |

|                                                                                                                                                                                       |                                                                                                                                                                                                                                                                                                                                                                                                                                                                                                                                                                                                                                                                                                                                                                                |                                                                                                                                                                                                                                                                                                                                                                                                                                                                   |                                                                                                                                                                                                                                                                                                                                                                                                                                                                                                                                                                                                                                                                                                                                                                      |
|---------------------------------------------------------------------------------------------------------------------------------------------------------------------------------------|--------------------------------------------------------------------------------------------------------------------------------------------------------------------------------------------------------------------------------------------------------------------------------------------------------------------------------------------------------------------------------------------------------------------------------------------------------------------------------------------------------------------------------------------------------------------------------------------------------------------------------------------------------------------------------------------------------------------------------------------------------------------------------|-------------------------------------------------------------------------------------------------------------------------------------------------------------------------------------------------------------------------------------------------------------------------------------------------------------------------------------------------------------------------------------------------------------------------------------------------------------------|----------------------------------------------------------------------------------------------------------------------------------------------------------------------------------------------------------------------------------------------------------------------------------------------------------------------------------------------------------------------------------------------------------------------------------------------------------------------------------------------------------------------------------------------------------------------------------------------------------------------------------------------------------------------------------------------------------------------------------------------------------------------|
| 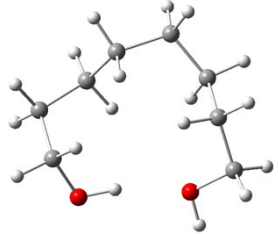 <p>symmetry <math>C_1</math><br/> <math>r(\text{OH}\cdots\text{OH}) = 1.974 \text{ \AA}</math></p>  | <p>H 2.685811 1.524465 -0.762371<br/> H 1.317478 0.573967 -1.277087<br/> C 0.795412 2.234585 -0.009908<br/> H 0.708772 2.934054 -0.846284<br/> H 1.242280 2.798975 0.814216<br/> C -0.605865 1.772643 0.406194<br/> H -0.527063 1.142493 1.294167<br/> H -1.187563 2.643231 0.720993<br/> C -1.377735 1.026832 -0.685336<br/> H -0.728049 0.310519 -1.190048<br/> H -1.686182 1.740797 -1.453523<br/> C -2.599883 0.267966 -0.165139<br/> H -3.220633 -0.045525 -1.007517<br/> H -3.215938 0.926657 0.456748<br/> C -2.251778 -0.980689 0.645074<br/> H -3.172652 -1.439192 1.009826<br/> H -1.659301 -0.714975 1.528283<br/> O 1.300344 -1.840144 -0.518843<br/> H 1.533140 -2.697180 -0.883579<br/> O -1.587643 -1.974803 -0.120147<br/> H -0.642335 -1.780310 -0.173601</p> | <p>symmetry <math>C_1</math><br/> <math>\phi_1(\text{C-C-C-C}) = -178.4^\circ</math><br/> <math>\phi_2(\text{C-C-C-C}) = -179.6^\circ</math><br/> <math>\phi_3(\text{C-C-C-C}) = -179.7^\circ</math><br/> <math>\phi_4(\text{C-C-C-C}) = -179.8^\circ</math><br/> <math>\phi_5(\text{C-C-C-C}) = -178.8^\circ</math></p>                                                                                                                                          | <p>H -1.937011 0.092138 -1.333319<br/> H -2.096213 1.067762 0.116405<br/> C -0.578445 -0.439254 0.249719<br/> H -0.409801 -1.461193 -0.104384<br/> H -0.587481 -0.495297 1.342907<br/> C 0.578675 0.447358 -0.201315<br/> H 0.410579 1.469461 0.155018<br/> H 0.584304 0.505257 -1.294726<br/> C 1.940129 -0.042936 0.282487<br/> H 2.114627 -1.058071 -0.079119<br/> H 1.936338 -0.101714 1.376249<br/> C 3.092498 0.851544 -0.166936<br/> H 2.949642 1.864062 0.222513<br/> H 3.095892 0.931590 -1.257618<br/> C 4.454788 0.359378 0.282362<br/> H 4.470034 0.250801 1.374057<br/> H 5.224298 1.089142 0.006425<br/> O -4.865821 0.876321 0.216280<br/> H -4.275942 1.549623 -0.131277<br/> O 4.712087 -0.896410 -0.346937<br/> H 5.555196 -1.234471 -0.037049</p> |
| <b>1,9-nonanediol, <math>\text{C}_9\text{H}_{20}\text{O}_2</math></b>                                                                                                                 |                                                                                                                                                                                                                                                                                                                                                                                                                                                                                                                                                                                                                                                                                                                                                                                |                                                                                                                                                                                                                                                                                                                                                                                                                                                                   |                                                                                                                                                                                                                                                                                                                                                                                                                                                                                                                                                                                                                                                                                                                                                                      |
|  <p>symmetry <math>C_1</math><br/> <math>r(\text{OH}\cdots\text{OH}) = 1.888 \text{ \AA}</math></p> | <p>C -2.232752 -1.324950 0.589958<br/> H -3.013397 -1.970399 1.002682<br/> H -1.575066 -1.040174 1.409374<br/> C -2.851356 -0.100713 -0.072293<br/> H -3.515857 0.378968 0.653436<br/> H -3.492487 -0.437828 -0.893750<br/> C -1.824112 0.905364 -0.595456<br/> H -2.319320 1.612900 -1.265463<br/> H -1.098286 0.365303 -1.204412<br/> C -1.109457 1.685636 0.509187<br/> H -1.831354 2.348796 0.994243<br/> H -0.767453 0.998811 1.285389<br/> C 0.081208 2.513364 0.012923<br/> H 0.431996 3.154179 0.827081<br/> H -0.260388 3.186200 -0.779502<br/> C 1.256476 1.677821 -0.505650<br/> H 1.983942 2.340388 -0.982513<br/> H 0.902172 1.014560 -1.297117<br/> C 1.964739 0.859546 0.576844<br/> H 2.549810 1.535983 1.205412</p>                                           |  <p>symmetry <math>C_1</math><br/> <math>\phi_1(\text{C-C-C-C}) = -179.9^\circ</math><br/> <math>\phi_2(\text{C-C-C-C}) = -180.0^\circ</math><br/> <math>\phi_3(\text{C-C-C-C}) = -179.9^\circ</math><br/> <math>\phi_4(\text{C-C-C-C}) = 179.8^\circ</math><br/> <math>\phi_5(\text{C-C-C-C}) = 179.9^\circ</math><br/> <math>\phi_6(\text{C-C-C-C}) = 179.0^\circ</math></p> | <p>C -4.965516 0.556888 0.149818<br/> H -4.983220 0.789571 1.221744<br/> H -4.909625 1.507281 -0.395168<br/> C -3.752741 -0.292746 -0.172204<br/> H -3.766634 -0.530211 -1.239007<br/> H -3.841101 -1.242823 0.360965<br/> C -2.438828 0.391968 0.193871<br/> H -2.364238 1.347833 -0.334924<br/> H -2.437673 0.634851 1.261569<br/> C -1.210523 -0.454994 -0.128183<br/> H -1.283737 -1.411572 0.399196<br/> H -1.209698 -0.697630 -1.195643<br/> C 0.106950 0.223255 0.236103<br/> H 0.179590 1.180145 -0.290908<br/> H 0.105565 0.465783 1.303985<br/> C 1.335856 -0.621979 -0.086784<br/> H 1.336516 -0.863830 -1.154637<br/> H 1.263861 -1.579734 0.439826<br/> C 2.651971 0.060123 0.274581<br/> H 2.730154 1.011644 -0.254846</p>                             |

|                                                                                                                                          |   |           |           |           |                                                                                                                                                                                                                                                                                                                                                                                                                                                                                                                    |   |           |           |           |
|------------------------------------------------------------------------------------------------------------------------------------------|---|-----------|-----------|-----------|--------------------------------------------------------------------------------------------------------------------------------------------------------------------------------------------------------------------------------------------------------------------------------------------------------------------------------------------------------------------------------------------------------------------------------------------------------------------------------------------------------------------|---|-----------|-----------|-----------|
|                                                                                                                                          | H | 1.235738  | 0.385637  | 1.234763  |                                                                                                                                                                                                                                                                                                                                                                                                                                                                                                                    | H | 2.653876  | 0.301111  | 1.343194  |
|                                                                                                                                          | C | 2.867800  | -0.244454 | 0.024832  |                                                                                                                                                                                                                                                                                                                                                                                                                                                                                                                    | C | 3.876261  | -0.792433 | -0.048375 |
|                                                                                                                                          | H | 3.531520  | 0.155023  | -0.749046 |                                                                                                                                                                                                                                                                                                                                                                                                                                                                                                                    | H | 3.827611  | -1.735341 | 0.504705  |
|                                                                                                                                          | H | 3.508078  | -0.626767 | 0.823364  |                                                                                                                                                                                                                                                                                                                                                                                                                                                                                                                    | H | 3.877790  | -1.051095 | -1.110954 |
|                                                                                                                                          | C | 2.093117  | -1.423019 | -0.554413 |                                                                                                                                                                                                                                                                                                                                                                                                                                                                                                                    | C | 5.192887  | -0.116990 | 0.283394  |
|                                                                                                                                          | H | 1.436786  | -1.088223 | -1.363633 |                                                                                                                                                                                                                                                                                                                                                                                                                                                                                                                    | H | 5.207287  | 0.170665  | 1.342157  |
|                                                                                                                                          | H | 2.797588  | -2.141573 | -0.988487 |                                                                                                                                                                                                                                                                                                                                                                                                                                                                                                                    | H | 6.022167  | -0.812810 | 0.112881  |
|                                                                                                                                          | O | -1.400056 | -2.077883 | -0.301781 |                                                                                                                                                                                                                                                                                                                                                                                                                                                                                                                    | O | -6.135610 | -0.168083 | -0.225148 |
|                                                                                                                                          | H | -1.932327 | -2.429232 | -1.020131 |                                                                                                                                                                                                                                                                                                                                                                                                                                                                                                                    | H | -6.909384 | 0.364493  | -0.026990 |
|                                                                                                                                          | O | 1.332264  | -2.059254 | 0.464027  |                                                                                                                                                                                                                                                                                                                                                                                                                                                                                                                    | O | 5.332761  | 1.035892  | -0.547797 |
|                                                                                                                                          | H | 0.430549  | -2.198131 | 0.146313  |                                                                                                                                                                                                                                                                                                                                                                                                                                                                                                                    | H | 6.145788  | 1.490655  | -0.316907 |
| <b>1,10-decanediol, C<sub>10</sub>H<sub>22</sub>O<sub>2</sub></b>                                                                        |   |           |           |           |                                                                                                                                                                                                                                                                                                                                                                                                                                                                                                                    |   |           |           |           |
| 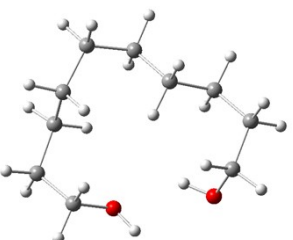 <p>symmetry C<sub>1</sub><br/>r(OH...OH) = 2.507 Å</p> | C | 2.193476  | 1.162714  | -0.520315 |  <p>symmetry C<sub>1</sub><br/> <math>\phi_1(\text{C-C-C-C}) = 178.9^\circ</math><br/> <math>\phi_2(\text{C-C-C-C}) = 179.8^\circ</math><br/> <math>\phi_3(\text{C-C-C-C}) = 179.8^\circ</math><br/> <math>\phi_4(\text{C-C-C-C}) = 179.9^\circ</math><br/> <math>\phi_5(\text{C-C-C-C}) = 179.9^\circ</math><br/> <math>\phi_6(\text{C-C-C-C}) = 179.6^\circ</math><br/> <math>\phi_7(\text{C-C-C-C}) = 178.4^\circ</math></p> | C | -3.205265 | -0.012790 | 0.281631  |
|                                                                                                                                          | H | 2.658688  | 2.118258  | -0.776730 |                                                                                                                                                                                                                                                                                                                                                                                                                                                                                                                    | H | -3.203369 | -0.121273 | 1.371650  |
|                                                                                                                                          | H | 1.918876  | 0.701474  | -1.473509 |                                                                                                                                                                                                                                                                                                                                                                                                                                                                                                                    | H | -3.328611 | -1.017679 | -0.126703 |
|                                                                                                                                          | C | 0.924640  | 1.413366  | 0.290655  |                                                                                                                                                                                                                                                                                                                                                                                                                                                                                                                    | C | -1.867200 | 0.564485  | -0.170479 |
|                                                                                                                                          | H | 0.458104  | 0.455266  | 0.523728  |                                                                                                                                                                                                                                                                                                                                                                                                                                                                                                                    | H | -1.871179 | 0.672861  | -1.260040 |
|                                                                                                                                          | H | 1.181118  | 1.867185  | 1.254097  |                                                                                                                                                                                                                                                                                                                                                                                                                                                                                                                    | H | -1.750439 | 1.575965  | 0.233414  |
|                                                                                                                                          | C | -0.086430 | 2.293448  | -0.440609 |                                                                                                                                                                                                                                                                                                                                                                                                                                                                                                                    | C | -0.669528 | -0.284731 | 0.245792  |
|                                                                                                                                          | H | 0.341023  | 3.288548  | -0.591329 |                                                                                                                                                                                                                                                                                                                                                                                                                                                                                                                    | H | -0.787113 | -1.295649 | -0.157571 |
|                                                                                                                                          | H | -0.246720 | 1.885782  | -1.441963 |                                                                                                                                                                                                                                                                                                                                                                                                                                                                                                                    | H | -0.664284 | -0.392961 | 1.335382  |
|                                                                                                                                          | C | -1.434236 | 2.434452  | 0.276879  |                                                                                                                                                                                                                                                                                                                                                                                                                                                                                                                    | C | 0.670011  | 0.287369  | -0.209516 |
|                                                                                                                                          | H | -1.291958 | 3.004781  | 1.199404  |                                                                                                                                                                                                                                                                                                                                                                                                                                                                                                                    | H | 0.786548  | 1.299053  | 0.193121  |
|                                                                                                                                          | H | -2.104094 | 3.030614  | -0.349534 |                                                                                                                                                                                                                                                                                                                                                                                                                                                                                                                    | H | 0.665316  | 0.394390  | -1.299264 |
|                                                                                                                                          | C | -2.116007 | 1.105981  | 0.624636  |                                                                                                                                                                                                                                                                                                                                                                                                                                                                                                                    | C | 1.867151  | -0.561597 | 0.208461  |
|                                                                                                                                          | H | -1.512667 | 0.582311  | 1.368572  |                                                                                                                                                                                                                                                                                                                                                                                                                                                                                                                    | H | 1.873675  | -0.667465 | 1.297948  |
|                                                                                                                                          | H | -3.071791 | 1.314587  | 1.113911  |                                                                                                                                                                                                                                                                                                                                                                                                                                                                                                                    | H | 1.751553  | -1.573463 | -0.193164 |
|                                                                                                                                          | C | -2.358480 | 0.194740  | -0.578374 |                                                                                                                                                                                                                                                                                                                                                                                                                                                                                                                    | C | 3.207342  | 0.009303  | -0.247768 |
|                                                                                                                                          | H | -1.443281 | 0.087133  | -1.160012 |                                                                                                                                                                                                                                                                                                                                                                                                                                                                                                                    | H | 3.309478  | 1.022116  | 0.155954  |
|                                                                                                                                          | H | -3.086588 | 0.668370  | -1.242345 |                                                                                                                                                                                                                                                                                                                                                                                                                                                                                                                    | H | 3.205254  | 0.109237  | -1.338835 |
|                                                                                                                                          | C | 3.229412  | 0.280668  | 0.181083  |                                                                                                                                                                                                                                                                                                                                                                                                                                                                                                                    | C | -4.397943 | 0.844433  | -0.133982 |
|                                                                                                                                          | H | 4.084388  | 0.135864  | -0.483333 |                                                                                                                                                                                                                                                                                                                                                                                                                                                                                                                    | H | -4.401984 | 0.972087  | -1.220119 |
|                                                                                                                                          | H | 3.604860  | 0.790314  | 1.074772  |                                                                                                                                                                                                                                                                                                                                                                                                                                                                                                                    | H | -4.304673 | 1.844606  | 0.299929  |
|                                                                                                                                          | C | 2.710319  | -1.088986 | 0.611153  |                                                                                                                                                                                                                                                                                                                                                                                                                                                                                                                    | C | -5.736590 | 0.269309  | 0.286816  |
|                                                                                                                                          | H | 1.959136  | -0.980766 | 1.401361  |                                                                                                                                                                                                                                                                                                                                                                                                                                                                                                                    | H | -6.539131 | 0.973273  | 0.039276  |
|                                                                                                                                          | H | 3.530524  | -1.675026 | 1.026704  |                                                                                                                                                                                                                                                                                                                                                                                                                                                                                                                    | H | -5.749599 | 0.112505  | 1.372682  |
|                                                                                                                                          | C | -2.853603 | -1.206219 | -0.212187 |                                                                                                                                                                                                                                                                                                                                                                                                                                                                                                                    | C | 4.402858  | -0.838585 | 0.179874  |
|                                                                                                                                          | H | -3.165719 | -1.729234 | -1.118892 |                                                                                                                                                                                                                                                                                                                                                                                                                                                                                                                    | H | 4.284136  | -1.854583 | -0.210475 |
|                                                                                                                                          | H | -3.733617 | -1.139226 | 0.434596  |                                                                                                                                                                                                                                                                                                                                                                                                                                                                                                                    | H | 4.427442  | -0.919383 | 1.269979  |
|                                                                                                                                          | C | -1.818007 | -2.066074 | 0.493139  |                                                                                                                                                                                                                                                                                                                                                                                                                                                                                                                    | C | 5.743399  | -0.299650 | -0.301065 |
|                                                                                                                                          | H | -1.521935 | -1.615546 | 1.446250  |                                                                                                                                                                                                                                                                                                                                                                                                                                                                                                                    | H | 6.546433  | -0.974291 | -0.004725 |
|                                                                                                                                          | H | -2.246904 | -3.049261 | 0.709373  |                                                                                                                                                                                                                                                                                                                                                                                                                                                                                                                    | H | 5.751927  | -0.240392 | -1.396857 |

|  |   |           |           |           |  |   |           |           |           |
|--|---|-----------|-----------|-----------|--|---|-----------|-----------|-----------|
|  | O | 2.185905  | -1.861034 | -0.464547 |  | O | -5.932819 | -0.968644 | -0.397614 |
|  | H | 1.329082  | -1.499001 | -0.717736 |  | H | -6.759866 | -1.358971 | -0.106466 |
|  | O | -0.675931 | -2.206688 | -0.357763 |  | O | 6.084098  | 0.962751  | 0.267347  |
|  | H | -0.066820 | -2.845183 | 0.024733  |  | H | 5.462847  | 1.621877  | -0.051569 |

<sup>a</sup>F conformers for 1,2-ethanediol and 1,3-propanediol and F-lin for all other conformers.

**Table S4**

Cartesian coordinates of all conformers of 1,4-butanediols calculated at B3LYP-D3(BJ)/def2-TZVPP level (in Å)

| Atom     | x         | y         | z         | Atom      | x         | y         | z         | Atom      | x         | y         | z         | Atom      | x         | y         | z         |
|----------|-----------|-----------|-----------|-----------|-----------|-----------|-----------|-----------|-----------|-----------|-----------|-----------|-----------|-----------|-----------|
| <b>1</b> |           |           |           | <b>2</b>  |           |           |           | <b>3</b>  |           |           |           | <b>4</b>  |           |           |           |
| C        | 1.604448  | 0.160821  | 0.313547  | C         | 1.440909  | -0.095732 | 0.540295  | C         | -1.593227 | 0.094862  | -0.346760 | C         | -1.840103 | 0.633968  | -0.199261 |
| H        | 2.635507  | 0.464564  | 0.112018  | H         | 0.927587  | -0.541667 | 1.398954  | H         | -2.645685 | 0.352384  | -0.197944 | H         | -1.848042 | 0.769399  | -1.281873 |
| H        | 1.477690  | 0.070962  | 1.397393  | H         | 2.464899  | 0.116948  | 0.850863  | H         | -1.428316 | -0.022635 | -1.417605 | H         | -2.352899 | 1.495463  | 0.242580  |
| C        | 0.652761  | 1.206225  | -0.242534 | C         | 0.753432  | 1.210337  | 0.140957  | C         | -0.704589 | 1.197959  | 0.214350  | C         | -0.408092 | 0.560315  | 0.309362  |
| H        | 1.063570  | 2.179622  | 0.038267  | H         | 1.404718  | 1.757661  | -0.544252 | H         | -1.139554 | 2.149058  | -0.106903 | H         | -0.420882 | 0.403487  | 1.394921  |
| H        | 0.692529  | 1.159309  | -1.334765 | H         | 0.652447  | 1.827522  | 1.040003  | H         | -0.781246 | 1.190105  | 1.308290  | H         | 0.074106  | 1.526181  | 0.145782  |
| C        | -0.804232 | 1.146847  | 0.233972  | C         | -0.617063 | 1.051406  | -0.528549 | C         | 0.770750  | 1.175787  | -0.201272 | C         | 0.410071  | -0.541680 | -0.358373 |
| H        | -1.292390 | 2.074896  | -0.078576 | H         | -0.496273 | 0.620824  | -1.524791 | H         | 1.230079  | 2.103591  | 0.152735  | H         | 0.453808  | -0.361589 | -1.436158 |
| H        | -0.835080 | 1.131003  | 1.327436  | H         | -1.051754 | 2.042971  | -0.673507 | H         | 0.845409  | 1.186936  | -1.292414 | H         | -0.087628 | -1.503384 | -0.219480 |
| C        | -1.649268 | -0.012930 | -0.289407 | C         | -1.624831 | 0.200974  | 0.225170  | C         | 1.614668  | 0.014183  | 0.322583  | C         | 1.824953  | -0.646613 | 0.173721  |
| H        | -1.568206 | -0.059463 | -1.384210 | H         | -2.632484 | 0.390205  | -0.156946 | H         | 1.471154  | -0.082760 | 1.408741  | H         | 2.339559  | -1.488507 | -0.302369 |
| H        | -2.696738 | 0.177840  | -0.051741 | H         | -1.614409 | 0.446251  | 1.293163  | H         | 2.668574  | 0.244166  | 0.160838  | H         | 1.803731  | -0.833584 | 1.254922  |
| O        | 1.358685  | -1.106509 | -0.318556 | O         | 1.525193  | -1.032188 | -0.521417 | O         | -1.340856 | -1.201791 | 0.214605  | O         | -2.584441 | -0.561667 | 0.033571  |
| H        | 1.978257  | -1.755081 | 0.025409  | H         | 0.643152  | -1.412075 | -0.615774 | H         | -1.554202 | -1.180663 | 1.151864  | H         | -2.666328 | -0.688527 | 0.982772  |
| O        | -1.340291 | -1.265542 | 0.293527  | O         | -1.293652 | -1.182932 | 0.032464  | O         | 1.383498  | -1.218112 | -0.332788 | O         | 2.507360  | 0.576868  | -0.105590 |
| H        | -0.424536 | -1.473022 | 0.055531  | H         | -1.864889 | -1.729585 | 0.576669  | H         | 0.467026  | -1.477707 | -0.155537 | H         | 3.400253  | 0.523510  | 0.242356  |
| <b>5</b> |           |           |           | <b>6</b>  |           |           |           | <b>7</b>  |           |           |           | <b>8</b>  |           |           |           |
| C        | 1.829134  | 0.639076  | -0.185637 | C         | -2.038372 | 0.362939  | 0.310377  | C         | 1.934851  | -0.375558 | 0.313206  | C         | 1.840121  | 0.620396  | 0.215977  |
| H        | 1.825166  | 0.784480  | -1.273042 | H         | -2.036127 | 0.263204  | 1.402672  | H         | 2.211626  | -1.245881 | -0.284552 | H         | 1.863930  | 0.697634  | 1.309777  |
| H        | 2.338671  | 1.497454  | 0.266156  | H         | -2.798507 | 1.104687  | 0.041221  | H         | 2.522363  | -0.412778 | 1.237846  | H         | 2.345308  | 1.501471  | -0.195149 |
| C        | 0.405462  | 0.558164  | 0.326768  | C         | -0.675642 | 0.827281  | -0.167137 | C         | 0.448861  | -0.407042 | 0.641627  | C         | 0.401634  | 0.580037  | -0.263956 |
| H        | -0.083914 | 1.517280  | 0.149924  | H         | -0.701055 | 0.907658  | -1.257397 | H         | 0.187542  | 0.482242  | 1.221522  | H         | -0.054926 | 1.544667  | -0.023900 |
| H        | 0.432688  | 0.408131  | 1.410106  | H         | -0.503651 | 1.835742  | 0.220269  | H         | 0.257205  | -1.266083 | 1.293392  | H         | 0.403829  | 0.484881  | -1.354308 |
| C        | -0.405463 | -0.558161 | -0.326776 | C         | 0.462798  | -0.095314 | 0.262372  | C         | -0.442884 | -0.485186 | -0.594751 | C         | -0.411210 | -0.554717 | 0.355131  |
| H        | 0.083915  | -1.517276 | -0.149935 | H         | 0.256397  | -1.107340 | -0.094851 | H         | -0.251076 | -1.420717 | -1.128630 | H         | -0.454794 | -0.424490 | 1.440213  |
| H        | -0.432692 | -0.408126 | -1.410113 | H         | 0.511268  | -0.146314 | 1.353488  | H         | -0.191026 | 0.325822  | -1.279760 | H         | 0.095872  | -1.502778 | 0.164522  |
| C        | -1.829133 | -0.639077 | 0.185634  | C         | 1.812861  | 0.363553  | -0.266798 | C         | -1.922925 | -0.413753 | -0.273020 | C         | -1.830815 | -0.648000 | -0.184898 |
| H        | -1.825160 | -0.784492 | 1.273037  | H         | 2.046549  | 1.362920  | 0.104012  | H         | -2.195427 | -1.214319 | 0.426346  | H         | -2.348903 | -1.490117 | 0.273450  |
| H        | -2.338670 | -1.497453 | -0.266164 | H         | 1.785278  | 0.422145  | -1.362180 | H         | -2.508726 | -0.553423 | -1.188211 | H         | -1.809756 | -0.825725 | -1.267108 |
| O        | 2.504428  | -0.574085 | 0.151846  | O         | -2.327311 | -0.892165 | -0.305205 | O         | 2.312974  | 0.752251  | -0.472492 | O         | 2.491697  | -0.573709 | -0.215875 |
| H        | 3.394835  | -0.545749 | -0.205112 | H         | -3.169784 | -1.214978 | 0.022240  | H         | 2.067462  | 1.550595  | 0.003756  | H         | 3.387317  | -0.584380 | 0.129087  |
| O        | -2.504428 | 0.574085  | -0.151835 | O         | 2.891088  | -0.460471 | 0.164960  | O         | -2.197654 | 0.864144  | 0.303670  | O         | -2.630480 | 0.495485  | 0.115268  |
| H        | -3.394834 | 0.545746  | 0.205126  | H         | 2.729542  | -1.357391 | -0.140403 | H         | -3.129923 | 0.912620  | 0.526497  | H         | -2.315986 | 1.238339  | -0.405255 |
| <b>9</b> |           |           |           | <b>10</b> |           |           |           | <b>11</b> |           |           |           | <b>12</b> |           |           |           |
| C        | -1.805146 | 0.348310  | -0.269741 | C         | 1.421543  | 0.153223  | -0.706732 | C         | 1.877429  | -0.515336 | 0.009282  | C         | 2.048232  | 0.354454  | 0.321253  |
| H        | -2.021172 | 1.359087  | 0.099452  | H         | 0.857040  | -0.482037 | -1.397141 | H         | 1.855689  | -1.139135 | 0.911189  | H         | 2.047453  | 0.236867  | 1.411994  |
| H        | -1.783055 | 0.393255  | -1.365484 | H         | 2.095361  | 0.775971  | -1.305141 | H         | 1.868690  | -1.188216 | -0.849010 | H         | 2.806005  | 1.097330  | 0.073060  |
| C        | -0.460613 | -0.117257 | 0.251049  | C         | 0.477755  | 1.044122  | 0.079511  | C         | 0.655648  | 0.391970  | -0.026175 | C         | 0.680041  | 0.830023  | -0.151003 |

|           |           |           |           |           |           |           |           |           |           |           |           |           |           |           |           |
|-----------|-----------|-----------|-----------|-----------|-----------|-----------|-----------|-----------|-----------|-----------|-----------|-----------|-----------|-----------|-----------|
| H         | -0.259863 | -1.119736 | -0.126995 | H         | 1.070249  | 1.732956  | 0.685642  | H         | 0.698610  | 1.081328  | 0.824609  | H         | 0.714704  | 0.969647  | -1.234769 |
| H         | -0.514787 | -0.191527 | 1.340579  | H         | -0.085038 | 1.646396  | -0.636314 | H         | 0.704950  | 1.005298  | -0.929417 | H         | 0.491295  | 1.813495  | 0.291578  |
| C         | 0.672817  | 0.823448  | -0.149301 | C         | -0.489125 | 0.283664  | 0.990510  | C         | -0.652941 | -0.392929 | 0.013718  | C         | -0.453321 | -0.124004 | 0.216887  |
| H         | 0.493519  | 1.822191  | 0.259861  | H         | -1.101399 | 1.006893  | 1.539366  | H         | -0.700398 | -1.004810 | 0.918092  | H         | -0.478268 | -0.278249 | 1.299361  |
| H         | 0.707138  | 0.929192  | -1.237256 | H         | 0.076658  | -0.275454 | 1.738284  | H         | -0.703734 | -1.081178 | -0.833649 | H         | -0.292562 | -1.102479 | -0.242948 |
| C         | 2.035632  | 0.357198  | 0.326635  | C         | -1.404858 | -0.691379 | 0.263259  | C         | -1.872072 | 0.507183  | -0.023053 | C         | -1.810137 | 0.382002  | -0.230738 |
| H         | 2.020017  | 0.213478  | 1.413904  | H         | -2.061010 | -1.190468 | 0.984810  | H         | -1.861389 | 1.110221  | -0.938997 | H         | -1.810899 | 0.529897  | -1.317332 |
| H         | 2.788896  | 1.119801  | 0.098625  | H         | -0.822170 | -1.468660 | -0.230006 | H         | -1.850996 | 1.197216  | 0.829506  | H         | -2.018417 | 1.351786  | 0.237562  |
| O         | -2.801304 | -0.569700 | 0.175380  | O         | 2.165240  | -0.646922 | 0.214785  | O         | 3.105816  | 0.198018  | -0.081079 | O         | 2.477715  | -0.847989 | -0.310029 |
| H         | -3.654422 | -0.295370 | -0.168492 | H         | 2.745279  | -1.231574 | -0.278013 | H         | 3.186358  | 0.770747  | 0.686237  | H         | 1.916340  | -1.570091 | -0.017185 |
| O         | 2.350402  | -0.866563 | -0.335530 | O         | -2.173360 | -0.082714 | -0.774665 | O         | -3.034701 | -0.315420 | 0.024817  | O         | -2.791381 | -0.580245 | 0.147764  |
| H         | 3.174801  | -1.210456 | 0.015145  | H         | -2.741903 | 0.585284  | -0.381735 | H         | -3.815085 | 0.242418  | -0.011095 | H         | -3.655210 | -0.277187 | -0.141595 |
| <b>13</b> |           |           |           | <b>14</b> |           |           |           | <b>15</b> |           |           |           | <b>16</b> |           |           |           |
| C         | 2.043269  | 0.353064  | -0.323553 | C         | 1.922938  | 0.388111  | 0.334210  | C         | -1.818840 | 0.392268  | -0.225275 | C         | -2.043454 | 0.352298  | -0.330890 |
| H         | 2.037480  | 0.254645  | -1.409989 | H         | 2.493431  | 0.430104  | 1.268903  | H         | -2.028681 | 1.353229  | 0.246300  | H         | -2.802901 | 1.104979  | -0.090859 |
| H         | 2.810753  | 1.090561  | -0.064405 | H         | 2.158801  | 1.289639  | -0.244905 | H         | -1.823528 | 0.554730  | -1.309903 | H         | -2.034101 | 0.230727  | -1.415014 |
| C         | 0.679749  | 0.823354  | 0.166788  | C         | 0.437080  | 0.349934  | 0.639640  | C         | -0.455145 | -0.118917 | 0.218102  | C         | -0.677268 | 0.819437  | 0.154762  |
| H         | 0.699866  | 0.891656  | 1.260713  | H         | 0.203613  | 1.188389  | 1.303647  | H         | -0.472341 | -0.264943 | 1.301913  | H         | -0.703276 | 0.915818  | 1.246695  |
| H         | 0.515336  | 1.842131  | -0.198330 | H         | 0.236058  | -0.568739 | 1.198429  | H         | -0.287949 | -1.101819 | -0.235920 | H         | -0.503466 | 1.827912  | -0.234648 |
| C         | -0.467241 | -0.080393 | -0.277736 | C         | -0.442913 | 0.417162  | -0.606812 | C         | 0.679535  | 0.826521  | -0.169783 | C         | 0.461984  | -0.106954 | -0.259966 |
| H         | -0.253790 | -1.107506 | 0.030849  | H         | -0.211081 | -0.420645 | -1.265093 | H         | 0.489607  | 1.817755  | 0.254451  | H         | 0.517868  | -0.159339 | -1.350311 |
| H         | -0.533051 | -0.086675 | -1.368774 | H         | -0.211652 | 1.334096  | -1.159365 | H         | 0.709505  | 0.946345  | -1.255968 | H         | 0.264124  | -1.119597 | 0.093209  |
| C         | -1.809281 | 0.352545  | 0.292479  | C         | -1.934091 | 0.413944  | -0.298110 | C         | 2.050424  | 0.363675  | 0.307215  | C         | 1.804100  | 0.350546  | 0.274636  |
| H         | -2.046202 | 1.369423  | -0.024487 | H         | -2.504447 | 0.541762  | -1.217915 | H         | 2.059303  | 0.282406  | 1.400853  | H         | 1.774420  | 0.387830  | 1.370995  |
| H         | -1.766124 | 0.357142  | 1.389334  | H         | -2.183896 | 1.255179  | 0.361934  | H         | 2.807332  | 1.096300  | 0.027836  | H         | 2.025481  | 1.363474  | -0.084834 |
| O         | 2.402420  | -0.935786 | 0.168449  | O         | 2.260558  | -0.784208 | -0.404507 | O         | -2.889551 | -0.461462 | 0.162496  | O         | -2.421143 | -0.920626 | 0.185489  |
| H         | 2.520062  | -0.878552 | 1.120613  | H         | 3.192181  | -0.753572 | -0.633460 | H         | -2.790112 | -1.304674 | -0.287593 | H         | -2.497263 | -0.853961 | 1.141320  |
| O         | -2.894759 | -0.447087 | -0.163797 | O         | -2.398059 | -0.811427 | 0.262309  | O         | 2.471240  | -0.861221 | -0.287433 | O         | 2.800054  | -0.567425 | -0.169275 |
| H         | -2.724600 | -1.361272 | 0.079395  | H         | -1.971088 | -0.946033 | 1.111845  | H         | 1.947512  | -1.579155 | 0.075977  | H         | 3.655642  | -0.285397 | 0.162475  |
| <b>17</b> |           |           |           | <b>18</b> |           |           |           | <b>19</b> |           |           |           | <b>20</b> |           |           |           |
| C         | 1.849810  | 0.616809  | -0.224791 | C         | 2.042387  | 0.349773  | 0.337374  | C         | -1.405801 | -0.335849 | -0.643887 | C         | -2.047048 | 0.350201  | 0.332315  |
| H         | 1.876838  | 0.699546  | -1.312196 | H         | 2.031762  | 0.224285  | 1.421193  | H         | -0.821957 | -1.251197 | -0.789681 | H         | -2.803357 | 1.098970  | 0.097998  |
| H         | 2.361875  | 1.494556  | 0.184515  | H         | 2.803536  | 1.101924  | 0.101590  | H         | -2.085726 | -0.237953 | -1.497168 | H         | -2.040330 | 0.219824  | 1.421855  |
| C         | 0.405534  | 0.579800  | 0.259265  | C         | 0.677613  | 0.821053  | -0.148065 | C         | -0.487239 | 0.870094  | -0.590499 | C         | -0.680088 | 0.826260  | -0.142840 |
| H         | -0.045871 | 1.551766  | 0.035574  | H         | 0.707160  | 0.936786  | -1.237699 | H         | -1.099547 | 1.773293  | -0.542193 | H         | -0.486202 | 1.806288  | 0.305012  |
| H         | 0.398500  | 0.476393  | 1.351583  | H         | 0.497214  | 1.821689  | 0.258145  | H         | 0.072334  | 0.907974  | -1.526383 | H         | -0.718756 | 0.973526  | -1.225314 |
| C         | -0.415206 | -0.541778 | -0.371907 | C         | -0.463461 | -0.116285 | 0.238814  | C         | 0.487239  | 0.870094  | 0.590498  | C         | 0.457351  | -0.130485 | 0.208310  |
| H         | 0.096089  | -1.493615 | -0.210522 | H         | -0.501016 | -0.205117 | 1.330641  | H         | -0.072334 | 0.907974  | 1.526382  | H         | 0.295293  | -1.106389 | -0.256477 |
| H         | -0.469474 | -0.389097 | -1.453216 | H         | -0.270946 | -1.116812 | -0.149853 | H         | 1.099547  | 1.773293  | 0.542192  | H         | 0.478266  | -0.290943 | 1.292799  |
| C         | -1.828835 | -0.650356 | 0.180844  | C         | -1.812737 | 0.366763  | -0.271461 | C         | 1.405801  | -0.335848 | 0.643887  | C         | 1.816017  | 0.384248  | -0.246270 |
| H         | -1.796304 | -0.847337 | 1.259922  | H         | -1.795798 | 0.446151  | -1.359605 | H         | 0.821957  | -1.251197 | 0.789681  | H         | 2.019849  | 1.359866  | 0.211975  |
| H         | -2.348192 | -1.486455 | -0.286799 | H         | -2.029440 | 1.368020  | 0.122672  | H         | 2.085726  | -0.237952 | 1.497168  | H         | 1.817269  | 0.528364  | -1.327333 |
| O         | 2.574423  | -0.571908 | 0.080001  | O         | 2.418053  | -0.922161 | -0.182772 | O         | -2.143674 | -0.404366 | 0.578697  | O         | -2.486047 | -0.842105 | -0.310688 |

|           |           |           |           |           |           |           |           |           |           |           |           |           |           |           |           |
|-----------|-----------|-----------|-----------|-----------|-----------|-----------|-----------|-----------|-----------|-----------|-----------|-----------|-----------|-----------|-----------|
| H         | 2.659184  | -0.643762 | 1.034688  | H         | 2.506229  | -0.850465 | -1.137253 | H         | -2.731015 | -1.162659 | 0.545794  | H         | -1.918118 | -1.568486 | -0.042200 |
| O         | -2.636107 | 0.493893  | -0.090855 | O         | -2.877994 | -0.529823 | 0.024332  | O         | 2.143674  | -0.404366 | -0.578697 | O         | 2.876428  | -0.527761 | 0.016378  |
| H         | -2.306986 | 1.235280  | 0.422810  | H         | -2.931988 | -0.638407 | 0.977721  | H         | 2.731015  | -1.162659 | -0.545793 | H         | 2.955644  | -0.643436 | 0.967081  |
| <b>21</b> |           |           |           | <b>22</b> |           |           |           | <b>23</b> |           |           |           | <b>24</b> |           |           |           |
| C         | -1.835934 | 0.642971  | 0.186110  | C         | 1.649015  | 0.078307  | 0.234214  | C         | 1.936220  | -0.396827 | 0.253787  | C         | -1.576704 | 0.245299  | 0.294414  |
| H         | -1.826103 | 0.820547  | 1.262833  | H         | 1.666266  | 0.364205  | 1.294129  | H         | 2.211371  | -1.193362 | -0.439589 | H         | -2.604573 | 0.495557  | 0.020937  |
| H         | -2.351866 | 1.489384  | -0.280437 | H         | 2.666857  | 0.198327  | -0.146196 | H         | 2.548415  | -0.520063 | 1.153963  | H         | -1.462535 | 0.455236  | 1.358889  |
| C         | -0.412557 | 0.542861  | -0.342166 | C         | 0.711036  | 1.001214  | -0.535903 | C         | 0.458882  | -0.488501 | 0.609597  | C         | -0.591871 | 1.067699  | -0.530104 |
| H         | -0.441907 | 0.353425  | -1.421707 | H         | 0.570681  | 0.590893  | -1.538443 | H         | 0.192772  | 0.345924  | 1.264799  | H         | -1.009097 | 2.068840  | -0.667316 |
| H         | 0.077922  | 1.511236  | -0.219136 | H         | 1.206191  | 1.966329  | -0.667107 | H         | 0.297046  | -1.399901 | 1.194215  | H         | -0.527862 | 0.625292  | -1.527412 |
| C         | 0.412557  | -0.542862 | 0.342166  | C         | -0.654209 | 1.254484  | 0.120128  | C         | -0.458882 | -0.488501 | -0.609597 | C         | 0.813902  | 1.201842  | 0.069683  |
| H         | -0.077922 | -1.511236 | 0.219136  | H         | -1.278772 | 1.820212  | -0.574649 | H         | -0.297046 | -1.399901 | -1.194215 | H         | 0.776127  | 1.870612  | 0.936015  |
| H         | 0.441906  | -0.353425 | 1.421707  | H         | -0.522419 | 1.880247  | 1.007145  | H         | -0.192772 | 0.345924  | -1.264799 | H         | 1.460191  | 1.681260  | -0.668867 |
| C         | 1.835934  | -0.642971 | -0.186110 | C         | -1.405784 | 0.009448  | 0.559490  | C         | -1.936220 | -0.396827 | -0.253787 | C         | 1.456824  | -0.109750 | 0.519583  |
| H         | 1.826103  | -0.820547 | -1.262833 | H         | -2.415970 | 0.280348  | 0.878783  | H         | -2.211371 | -1.193362 | 0.439589  | H         | 0.958596  | -0.482491 | 1.421020  |
| H         | 2.351866  | -1.489384 | 0.280437  | H         | -0.895529 | -0.465603 | 1.402242  | H         | -2.548415 | -0.520063 | -1.153963 | H         | 2.500364  | 0.070898  | 0.780996  |
| O         | -2.588276 | -0.556927 | 0.012649  | O         | 1.312886  | -1.301423 | 0.130147  | O         | 2.274426  | 0.816277  | -0.416880 | O         | -1.378097 | -1.173707 | 0.153586  |
| H         | -2.690834 | -0.718849 | -0.929220 | H         | 0.449991  | -1.378808 | -0.296702 | H         | 2.117126  | 1.549156  | 0.184849  | H         | -1.865886 | -1.471342 | -0.618169 |
| O         | 2.588276  | 0.556927  | -0.012649 | O         | -1.466669 | -0.906357 | -0.545782 | O         | -2.274426 | 0.816277  | 0.416880  | O         | 1.453283  | -1.109810 | -0.487729 |
| H         | 2.690835  | 0.718848  | 0.929220  | H         | -2.017381 | -1.654626 | -0.301698 | H         | -2.117124 | 1.549156  | -0.184849 | H         | 0.560279  | -1.476261 | -0.484406 |
| <b>25</b> |           |           |           | <b>26</b> |           |           |           | <b>27</b> |           |           |           | <b>28</b> |           |           |           |
| C         | 1.920276  | 0.399673  | 0.329785  | C         | 1.728371  | 0.057805  | 0.547534  | C         | 1.932452  | -0.434610 | -0.269717 | C         | 1.429103  | -0.079056 | 0.487880  |
| H         | 2.166503  | 1.279102  | -0.279439 | H         | 2.662241  | 0.545985  | 0.847056  | H         | 2.498046  | -0.619856 | -1.182648 | H         | 1.620586  | 0.677335  | 1.260777  |
| H         | 2.484661  | 0.472330  | 1.266378  | H         | 1.267238  | -0.356371 | 1.450798  | H         | 2.203284  | -1.218924 | 0.448199  | H         | 0.956736  | -0.930293 | 0.977151  |
| C         | 0.433725  | 0.377697  | 0.628217  | C         | 0.810678  | 1.081725  | -0.099906 | C         | 0.439714  | -0.484661 | -0.566462 | C         | 0.520817  | 0.496440  | -0.589963 |
| H         | 0.203993  | -0.501357 | 1.231333  | H         | 1.343415  | 1.538675  | -0.936413 | H         | 0.213868  | -1.453679 | -1.023548 | H         | 1.062159  | 1.293172  | -1.110915 |
| H         | 0.197564  | 1.254904  | 1.239138  | H         | 0.626046  | 1.877558  | 0.627837  | H         | 0.197053  | 0.277806  | -1.307750 | H         | 0.307292  | -0.278622 | -1.326157 |
| C         | -0.433725 | 0.377697  | -0.628217 | C         | -0.519530 | 0.517296  | -0.604936 | C         | -0.438023 | -0.296692 | 0.667809  | C         | -0.789872 | 1.071955  | -0.048066 |
| H         | -0.203993 | -0.501358 | -1.231333 | H         | -0.316946 | -0.269687 | -1.335489 | H         | -0.216573 | 0.666111  | 1.142778  | H         | -1.321360 | 1.577413  | -0.856958 |
| H         | -0.197564 | 1.254904  | -1.239138 | H         | -1.069906 | 1.303948  | -1.125040 | H         | -0.209516 | -1.068900 | 1.410766  | H         | -0.580787 | 1.829586  | 0.713215  |
| C         | -1.920276 | 0.399673  | -0.329785 | C         | -1.414219 | -0.038828 | 0.493720  | C         | -1.930994 | -0.352018 | 0.367336  | C         | -1.725113 | 0.039678  | 0.559228  |
| H         | -2.484661 | 0.472330  | -1.266378 | H         | -1.624541 | 0.732219  | 1.237159  | H         | -2.503142 | -0.293401 | 1.300236  | H         | -2.625024 | 0.540859  | 0.933020  |
| H         | -2.166503 | 1.279102  | 0.279439  | H         | -0.920654 | -0.867658 | 1.012522  | H         | -2.181210 | -1.300412 | -0.110631 | H         | -1.247901 | -0.459510 | 1.409760  |
| O         | 2.263063  | -0.798316 | -0.366802 | O         | 1.985960  | -0.979128 | -0.398914 | O         | 2.375127  | 0.839035  | 0.196439  | O         | 2.653991  | -0.584714 | -0.032936 |
| H         | 3.200487  | -0.782672 | -0.572054 | H         | 2.570311  | -1.627975 | -0.000545 | H         | 2.049271  | 0.973326  | 1.089326  | H         | 3.094496  | 0.120014  | -0.515740 |
| O         | -2.263063 | -0.798316 | 0.366802  | O         | -2.688086 | -0.452021 | 0.006324  | O         | -2.359587 | 0.652275  | -0.546867 | O         | -2.062411 | -0.908591 | -0.451121 |
| H         | -3.200487 | -0.782672 | 0.572054  | H         | -2.551996 | -1.135500 | -0.655636 | H         | -2.194288 | 1.515330  | -0.157107 | H         | -2.608449 | -1.597621 | -0.066168 |
| <b>29</b> |           |           |           | <b>30</b> |           |           |           | <b>31</b> |           |           |           | <b>32</b> |           |           |           |
| C         | -1.877279 | 0.517986  | 0.035739  | C         | 1.824990  | 0.212491  | -0.070515 | C         | 1.433949  | -0.635191 | -0.368925 | C         | -1.265657 | -0.388499 | 0.228111  |
| H         | -1.863139 | 1.234375  | -0.786548 | H         | 2.178059  | 0.640207  | 0.876564  | H         | 0.883474  | -0.708390 | -1.306072 | H         | -1.196309 | -0.521258 | 1.314530  |
| H         | -1.860016 | 1.094416  | 0.968623  | H         | 2.615015  | 0.354530  | -0.816500 | H         | 2.071976  | -1.522926 | -0.300425 | H         | -0.780938 | -1.246792 | -0.239937 |
| C         | -0.656197 | -0.388007 | -0.040456 | C         | 0.570184  | 0.936379  | -0.522720 | C         | 0.476086  | -0.598965 | 0.815199  | C         | -0.576184 | 0.903173  | -0.173178 |

|           |           |           |           |           |           |           |           |           |           |           |           |           |           |           |           |
|-----------|-----------|-----------|-----------|-----------|-----------|-----------|-----------|-----------|-----------|-----------|-----------|-----------|-----------|-----------|-----------|
| H         | -0.704284 | -0.958544 | -0.971229 | H         | 0.204989  | 0.484079  | -1.446248 | H         | 1.056943  | -0.594988 | 1.743313  | H         | -1.177082 | 1.728944  | 0.214992  |
| H         | -0.700528 | -1.116459 | 0.776642  | H         | 0.867355  | 1.959016  | -0.769411 | H         | -0.099803 | -1.527270 | 0.812868  | H         | -0.596845 | 0.991521  | -1.262942 |
| C         | 0.656197  | 0.388006  | 0.040456  | C         | -0.564402 | 0.981238  | 0.505747  | C         | -0.476086 | 0.598967  | 0.815198  | C         | 0.860105  | 1.052596  | 0.333255  |
| H         | 0.704285  | 0.958544  | 0.971228  | H         | -1.242075 | 1.801215  | 0.256037  | H         | 0.099803  | 1.527273  | 0.812864  | H         | 0.896977  | 0.904187  | 1.416176  |
| H         | 0.700529  | 1.116457  | -0.776643 | H         | -0.158959 | 1.201027  | 1.498243  | H         | -1.056943 | 0.594993  | 1.743311  | H         | 1.185511  | 2.079695  | 0.150206  |
| C         | 1.877279  | -0.517987 | -0.035738 | C         | -1.392957 | -0.289939 | 0.593238  | C         | -1.433949 | 0.635190  | -0.368927 | C         | 1.884525  | 0.136335  | -0.311250 |
| H         | 1.860015  | -1.094419 | -0.968620 | H         | -2.118081 | -0.196338 | 1.410282  | H         | -0.883474 | 0.708386  | -1.306073 | H         | 2.892357  | 0.467908  | -0.037623 |
| H         | 1.863140  | -1.234373 | 0.786551  | H         | -0.747319 | -1.145033 | 0.795360  | H         | -2.071977 | 1.522925  | -0.300429 | H         | 1.797325  | 0.192330  | -1.403352 |
| O         | -3.105632 | -0.187007 | -0.099881 | O         | 1.549517  | -1.181777 | 0.091653  | O         | 2.227415  | 0.544833  | -0.489510 | O         | -2.632787 | -0.286082 | -0.179558 |
| H         | -3.195429 | -0.794514 | 0.639052  | H         | 2.353957  | -1.625145 | 0.370670  | H         | 2.786504  | 0.619102  | 0.288756  | H         | -3.068985 | -1.122996 | -0.004912 |
| O         | 3.105633  | 0.187006  | 0.099878  | O         | -2.079667 | -0.460113 | -0.650597 | O         | -2.227415 | -0.544834 | -0.489508 | O         | 1.672069  | -1.203508 | 0.138465  |
| H         | 3.195412  | 0.794536  | -0.639038 | H         | -2.338636 | -1.379453 | -0.737932 | H         | -2.786504 | -0.619102 | 0.288758  | H         | 2.316997  | -1.778447 | -0.280019 |
| <b>33</b> |           |           |           | <b>34</b> |           |           |           | <b>35</b> |           |           |           | <b>36</b> |           |           |           |
| C         | -1.723462 | 0.019909  | 0.560978  | C         | -1.872460 | 0.503402  | 0.000001  | C         | -1.451887 | 0.016486  | 0.485504  | C         | 1.842666  | 0.630317  | 0.212940  |
| H         | -2.640979 | 0.496463  | 0.924049  | H         | -1.857096 | 1.150843  | 0.885173  | H         | -0.979905 | -0.750110 | 1.108787  | H         | 1.850737  | 0.745395  | 1.303519  |
| H         | -1.247846 | -0.474055 | 1.416051  | H         | -1.857094 | 1.150847  | -0.885168 | H         | -1.691029 | 0.861603  | 1.133429  | H         | 2.353676  | 1.494685  | -0.210639 |
| C         | -0.803069 | 1.079009  | -0.022271 | C         | -0.652045 | -0.395684 | 0.000000  | C         | -0.513300 | 0.460243  | -0.628664 | C         | 0.406337  | 0.575879  | -0.293008 |
| H         | -0.606756 | 1.820605  | 0.758059  | H         | -0.701712 | -1.046130 | 0.876954  | H         | -0.293906 | -0.395172 | -1.273295 | H         | -0.068056 | 1.529236  | -0.038927 |
| H         | -1.340728 | 1.596913  | -0.819093 | H         | -0.701712 | -1.046128 | -0.876955 | H         | -1.038171 | 1.196031  | -1.241047 | H         | 0.422207  | 0.500774  | -1.384385 |
| C         | 0.516474  | 0.543958  | -0.581113 | C         | 0.652045  | 0.395684  | 0.000001  | C         | 0.802866  | 1.056632  | -0.124936 | C         | -0.406337 | -0.575879 | 0.293007  |
| H         | 1.075622  | 1.367577  | -1.029793 | H         | 0.701712  | 1.046129  | 0.876956  | H         | 0.600322  | 1.880099  | 0.567708  | H         | -0.422206 | -0.500774 | 1.384384  |
| H         | 0.316376  | -0.176600 | -1.374075 | H         | 0.701712  | 1.046130  | -0.876954 | H         | 1.342055  | 1.498778  | -0.968753 | H         | 0.068056  | -1.529236 | 0.038926  |
| C         | 1.403052  | -0.108108 | 0.462694  | C         | 1.872460  | -0.503401 | 0.000001  | C         | 1.724522  | 0.061184  | 0.573590  | C         | -1.842666 | -0.630317 | -0.212940 |
| H         | 0.928760  | -1.013823 | 0.855276  | H         | 1.857093  | -1.150846 | -0.885169 | H         | 1.245175  | -0.359018 | 1.457172  | H         | -2.353676 | -1.494685 | 0.210639  |
| H         | 1.559044  | 0.580213  | 1.303944  | H         | 1.857096  | -1.150843 | 0.885172  | H         | 2.631942  | 0.573556  | 0.911627  | H         | -1.850738 | -0.745394 | -1.303519 |
| O         | -2.022211 | -0.930567 | -0.459745 | O         | -3.034120 | -0.322014 | -0.000003 | O         | -2.704571 | -0.449552 | -0.007445 | O         | 2.621000  | -0.497690 | -0.176743 |
| H         | -2.595663 | -1.609756 | -0.097888 | H         | -3.814779 | 0.236542  | 0.000007  | H         | -2.548355 | -1.230492 | -0.545440 | H         | 2.322885  | -1.266582 | 0.314987  |
| O         | 2.647299  | -0.430398 | -0.156500 | O         | 3.034120  | 0.322013  | -0.000003 | O         | 2.056016  | -1.061735 | -0.239708 | O         | -2.621000 | 0.497690  | 0.176744  |
| H         | 3.193489  | -0.908429 | 0.471697  | H         | 3.814779  | -0.236542 | 0.000016  | H         | 2.547109  | -0.752251 | -1.005927 | H         | -2.322884 | 1.266583  | -0.314985 |
| <b>37</b> |           |           |           | <b>38</b> |           |           |           | <b>39</b> |           |           |           | <b>40</b> |           |           |           |
| C         | -1.434904 | 0.701635  | -0.207554 | C         | 1.723291  | 0.001569  | 0.574074  | C         | -1.292768 | -0.365978 | -0.297035 | C         | -1.431840 | -0.593686 | -0.424440 |
| H         | -0.882915 | 1.000583  | -1.099487 | H         | 2.643327  | 0.466982  | 0.945532  | H         | -1.293204 | -0.376477 | -1.387809 | H         | -2.092460 | -1.460117 | -0.435480 |
| H         | -2.069555 | 1.548837  | 0.075280  | H         | 1.248634  | -0.490843 | 1.422750  | H         | -0.786969 | -1.273307 | 0.035991  | H         | -0.866110 | -0.609378 | -1.362361 |
| C         | -0.483696 | 0.367270  | 0.936063  | C         | 0.808764  | 1.072893  | -0.011749 | C         | -0.568182 | 0.878310  | 0.205657  | C         | -0.491848 | -0.684386 | 0.770556  |
| H         | -1.073995 | 0.126375  | 1.825809  | H         | 0.614741  | 1.815530  | 0.769090  | H         | -1.166423 | 1.744363  | -0.086356 | H         | 0.076806  | -1.612452 | 0.686521  |
| H         | 0.077677  | 1.270688  | 1.195627  | H         | 1.349382  | 1.602251  | -0.802830 | H         | -0.549564 | 0.869597  | 1.301652  | H         | -1.092529 | -0.752807 | 1.680019  |
| C         | 0.479414  | -0.786974 | 0.647991  | C         | -0.511636 | 0.550370  | -0.579066 | C         | 0.859221  | 1.053523  | -0.323080 | C         | 0.482544  | 0.488973  | 0.909425  |
| H         | -0.095177 | -1.683989 | 0.406025  | H         | -0.316460 | -0.165390 | -1.378576 | H         | 1.179681  | 2.080892  | -0.132362 | H         | 1.079688  | 0.349985  | 1.812866  |
| H         | 1.054681  | -1.004241 | 1.550391  | H         | -1.068370 | 1.379064  | -1.021255 | H         | 0.874519  | 0.920808  | -1.408537 | H         | -0.068832 | 1.423482  | 1.051271  |
| C         | 1.454082  | -0.529106 | -0.494783 | C         | -1.400365 | -0.111948 | 0.456710  | C         | 1.905051  | 0.141503  | 0.291657  | C         | 1.427276  | 0.667942  | -0.266239 |
| H         | 0.916615  | -0.389349 | -1.438283 | H         | -1.545036 | 0.562601  | 1.311029  | H         | 1.870577  | 0.224539  | 1.385311  | H         | 2.089230  | 1.519764  | -0.075494 |
| H         | 2.102107  | -1.395902 | -0.621511 | H         | -0.933450 | -1.029457 | 0.828416  | H         | 2.900942  | 0.459123  | -0.036749 | H         | 0.866190  | 0.886584  | -1.183191 |
| O         | -2.229824 | -0.406004 | -0.620807 | O         | 2.025605  | -1.046399 | -0.342228 | O         | -2.669327 | -0.373529 | 0.084321  | O         | -2.298305 | 0.539982  | -0.383159 |

|           |           |           |           |           |           |           |           |           |           |           |           |           |           |           |           |
|-----------|-----------|-----------|-----------|-----------|-----------|-----------|-----------|-----------|-----------|-----------|-----------|-----------|-----------|-----------|-----------|
| H         | -2.782378 | -0.680330 | 0.116398  | H         | 2.470130  | -0.669067 | -1.106475 | H         | -2.720920 | -0.483421 | 1.037274  | H         | -1.772997 | 1.336593  | -0.488748 |
| O         | 2.333087  | 0.568815  | -0.251643 | O         | -2.650112 | -0.407261 | -0.164259 | O         | 1.660719  | -1.206180 | -0.113237 | O         | 2.182997  | -0.530949 | -0.424110 |
| H         | 1.837454  | 1.387881  | -0.320946 | H         | -3.187170 | -0.919690 | 0.444391  | H         | 2.340286  | -1.772604 | 0.259718  | H         | 2.786685  | -0.426968 | -1.163066 |
| <b>41</b> |           |           |           | <b>42</b> |           |           |           | <b>43</b> |           |           |           | <b>44</b> |           |           |           |
| C         | -1.742053 | 0.157919  | 0.098074  | C         | 1.547815  | -0.418671 | -0.299787 | C         | 1.876747  | -0.519491 | -0.007254 | C         | -1.933271 | 0.399306  | 0.321225  |
| H         | -2.637860 | 0.276725  | -0.511480 | H         | 1.484417  | -0.420475 | -1.395530 | H         | 1.870074  | -1.160916 | -0.889353 | H         | -2.500339 | 0.472152  | 1.248982  |
| H         | -2.008076 | 0.426534  | 1.127265  | O         | 2.905010  | -0.393997 | 0.128397  | H         | 1.850803  | -1.175626 | 0.871719  | H         | -2.176132 | 1.282790  | -0.282604 |
| C         | -0.652566 | 1.098452  | -0.407675 | C         | 0.730403  | 0.738160  | 0.262170  | C         | 0.656370  | 0.390331  | -0.014240 | C         | -0.439741 | 0.373568  | 0.624287  |
| H         | -1.080260 | 2.104607  | -0.399490 | H         | 0.769267  | 0.699450  | 1.353880  | H         | 0.709164  | 1.037696  | -0.893042 | H         | -0.235482 | -0.512094 | 1.232226  |
| H         | -0.439170 | 0.867556  | -1.456231 | H         | 1.212575  | 1.675655  | -0.032161 | H         | 0.694469  | 1.046949  | 0.862280  | H         | -0.200104 | 1.250048  | 1.236015  |
| C         | 0.652567  | 1.098452  | 0.407675  | C         | -0.721755 | 0.763840  | -0.218166 | C         | -0.656370 | -0.390331 | -0.014239 | C         | 0.439740  | 0.373568  | -0.624287 |
| H         | 0.439170  | 0.867555  | 1.456231  | H         | -0.758169 | 0.785026  | -1.310485 | H         | -0.694468 | -1.046949 | 0.862281  | H         | 0.200104  | 1.250048  | -1.236015 |
| H         | 1.080260  | 2.104607  | 0.399492  | H         | -1.204185 | 1.680150  | 0.127035  | H         | -0.709164 | -1.037697 | -0.893040 | H         | 0.235482  | -0.512094 | -1.232226 |
| C         | 1.742053  | 0.157919  | -0.098074 | H         | 3.302927  | 0.431751  | -0.160884 | C         | -1.876747 | 0.519491  | -0.007254 | C         | 1.933271  | 0.399306  | -0.321225 |
| H         | 2.637861  | 0.276725  | 0.511479  | H         | 1.158763  | -1.375315 | 0.047646  | H         | -1.870074 | 1.160915  | -0.889353 | H         | 2.176132  | 1.282790  | 0.282604  |
| H         | 2.008075  | 0.426534  | -1.127266 | C         | -1.549054 | -0.409647 | 0.274956  | H         | -1.850803 | 1.175627  | 0.871719  | H         | 2.500339  | 0.472152  | -1.248982 |
| O         | -1.410310 | -1.225402 | 0.021690  | H         | -1.166923 | -1.351560 | -0.133036 | O         | 3.106419  | 0.194097  | -0.067324 | O         | -2.401401 | -0.785468 | -0.313837 |
| H         | -0.721370 | -1.410435 | 0.669637  | H         | -1.486593 | -0.470656 | 1.368733  | H         | 3.181570  | 0.745804  | 0.715944  | H         | -2.010076 | -0.846394 | -1.188731 |
| O         | 1.410311  | -1.225402 | -0.021691 | O         | -2.895881 | -0.199484 | -0.142612 | O         | -3.106419 | -0.194097 | -0.067323 | O         | 2.401401  | -0.785468 | 0.313837  |
| H         | 0.721363  | -1.410434 | -0.669631 | H         | -3.429562 | -0.948267 | 0.133490  | H         | -3.181572 | -0.745801 | 0.715947  | H         | 2.010077  | -0.846393 | 1.188731  |
| <b>45</b> |           |           |           | <b>46</b> |           |           |           | <b>47</b> |           |           |           | <b>48</b> |           |           |           |
| C         | 1.428339  | -0.024005 | 0.478043  | C         | 1.268376  | -0.402775 | 0.244701  | C         | 0.417201  | 1.914833  | 0.399270  | C         | 1.430850  | -0.084359 | 0.480407  |
| H         | 0.954281  | -0.850218 | 1.020128  | H         | 0.767692  | -1.267991 | -0.180099 | H         | 1.067610  | 1.916978  | 1.283072  | H         | 1.610910  | 0.664091  | 1.263557  |
| H         | 1.636844  | 0.770296  | 1.205475  | O         | 2.618960  | -0.469162 | -0.209300 | O         | 1.181007  | 2.114436  | -0.785158 | H         | 0.967695  | -0.948180 | 0.955488  |
| C         | 0.509879  | 0.506340  | -0.607398 | C         | 0.581352  | 0.888158  | -0.186541 | C         | -0.417201 | 0.639597  | 0.373297  | C         | 0.517025  | 0.494522  | -0.591750 |
| H         | 0.327987  | -0.288476 | -1.336021 | H         | 1.180113  | 1.729863  | 0.178731  | H         | -1.074310 | 0.643309  | 1.249676  | H         | 1.054972  | 1.292362  | -1.114219 |
| H         | 1.045178  | 1.287808  | -1.149673 | H         | 0.599056  | 0.949374  | -1.278175 | H         | -1.057410 | 0.674889  | -0.512476 | H         | 0.304259  | -0.281575 | -1.328040 |
| C         | -0.814501 | 1.065558  | -0.083308 | C         | -0.852687 | 1.061836  | 0.322340  | C         | 0.417201  | -0.639597 | 0.373297  | C         | -0.791789 | 1.063671  | -0.040006 |
| H         | -1.353201 | 1.532743  | -0.909961 | H         | -1.169443 | 2.089949  | 0.129885  | H         | 1.074310  | -0.643309 | 1.249676  | H         | -1.325192 | 1.581500  | -0.843515 |
| H         | -0.616221 | 1.854235  | 0.649737  | H         | -0.888112 | 0.923649  | 1.406703  | H         | 1.057410  | -0.674889 | -0.512476 | H         | -0.580255 | 1.823016  | 0.720058  |
| C         | -1.735746 | 0.035331  | 0.563494  | H         | 3.107129  | 0.266215  | 0.170901  | H         | 1.848252  | 1.426420  | -0.846122 | C         | -1.724860 | 0.024459  | 0.574220  |
| H         | -2.650410 | 0.523674  | 0.898933  | H         | 1.218791  | -0.504790 | 1.335565  | H         | -0.234734 | 2.785085  | 0.471715  | H         | -2.622799 | 0.520009  | 0.960006  |
| H         | -1.264147 | -0.407321 | 1.448363  | C         | -1.885036 | 0.146625  | -0.311422 | C         | -0.417201 | -1.914833 | 0.399270  | H         | -1.247760 | -0.475391 | 1.416862  |
| O         | 2.631195  | -0.467551 | -0.145101 | H         | -2.889789 | 0.488764  | -0.039124 | H         | 0.234734  | -2.785085 | 0.471715  | O         | 2.662125  | -0.566215 | -0.046644 |
| H         | 3.222292  | -0.815943 | 0.526476  | H         | -1.799586 | 0.191939  | -1.404101 | H         | -1.067610 | -1.916978 | 1.283072  | H         | 3.109196  | 0.158522  | -0.492293 |
| O         | -2.160563 | -0.983904 | -0.335660 | O         | -1.679440 | -1.188439 | 0.151760  | O         | -1.181007 | -2.114436 | -0.785158 | O         | -2.075573 | -1.019536 | -0.328730 |
| H         | -1.395481 | -1.494510 | -0.612355 | H         | -2.314044 | -1.769225 | -0.274437 | H         | -1.848252 | -1.426420 | -0.846122 | H         | -2.550800 | -0.638098 | -1.072144 |
| <b>49</b> |           |           |           | <b>50</b> |           |           |           | <b>51</b> |           |           |           | <b>52</b> |           |           |           |
| C         | 1.608852  | 0.150308  | 0.281114  | C         | 1.552847  | -0.408025 | -0.312626 | C         | -1.430493 | -0.032877 | 0.494231  | C         | 2.034512  | 0.355342  | 0.333215  |
| H         | 1.505697  | 0.380986  | 1.351148  | H         | 1.505914  | -0.405386 | -1.402727 | H         | -0.953719 | -0.845761 | 1.042090  | H         | 2.789213  | 1.116218  | 0.104801  |
| H         | 2.641350  | 0.373719  | 0.006883  | O         | 2.936465  | -0.303172 | 0.008338  | H         | -1.643707 | 0.761733  | 1.220330  | H         | 2.019158  | 0.212486  | 1.420985  |
| C         | 0.662851  | 1.034975  | -0.529017 | C         | 0.730258  | 0.747445  | 0.244307  | C         | -0.515562 | 0.499139  | -0.601394 | C         | 0.673042  | 0.824377  | -0.143319 |

|           |           |           |           |           |           |           |           |           |           |           |           |           |           |           |           |
|-----------|-----------|-----------|-----------|-----------|-----------|-----------|-----------|-----------|-----------|-----------|-----------|-----------|-----------|-----------|-----------|
| H         | 0.587531  | 0.611609  | -1.533444 | H         | 0.763613  | 0.718163  | 1.339469  | H         | -1.048167 | 1.282130  | -1.150074 | H         | 0.485810  | 1.814510  | 0.282904  |
| H         | 1.116116  | 2.021741  | -0.648682 | H         | 1.214903  | 1.678076  | -0.056620 | H         | -0.328510 | -0.297789 | -1.325910 | H         | 0.711448  | 0.949930  | -1.228809 |
| C         | -0.735788 | 1.227991  | 0.078074  | C         | -0.726024 | 0.760680  | -0.224497 | C         | 0.807079  | 1.070951  | -0.084583 | C         | -0.461995 | -0.127716 | 0.227237  |
| H         | -1.376670 | 1.729552  | -0.654056 | H         | -0.767502 | 0.782546  | -1.316456 | H         | 0.606348  | 1.854890  | 0.652897  | H         | -0.496542 | -0.241761 | 1.317320  |
| H         | -0.671460 | 1.904624  | 0.935309  | H         | -1.211577 | 1.674440  | 0.123228  | H         | 1.339051  | 1.544765  | -0.911813 | H         | -0.267550 | -1.116146 | -0.189057 |
| C         | -1.420695 | -0.043257 | 0.564317  | H         | 3.032622  | -0.322357 | 0.964369  | C         | 1.737788  | 0.043415  | 0.553761  | C         | -1.814020 | 0.365459  | -0.265345 |
| H         | -2.447316 | 0.175506  | 0.872204  | H         | 1.155689  | -1.370927 | 0.027320  | H         | 1.275422  | -0.404237 | 1.440305  | H         | -1.805837 | 0.457899  | -1.352284 |
| H         | -0.899928 | -0.451496 | 1.429788  | C         | -1.545879 | -0.416416 | 0.272779  | H         | 2.651193  | 0.537291  | 0.884470  | H         | -2.024567 | 1.362318  | 0.143526  |
| O         | 1.429333  | -1.240777 | 0.057955  | H         | -1.169701 | -1.355816 | -0.146117 | O         | -2.636730 | -0.589451 | -0.016171 | O         | 2.345926  | -0.870137 | -0.327361 |
| H         | 0.509443  | -1.409516 | -0.186285 | H         | -1.468166 | -0.484150 | 1.365661  | H         | -3.105466 | 0.090517  | -0.507919 | H         | 3.192258  | -1.191994 | -0.008993 |
| O         | -1.409539 | -1.104083 | -0.398553 | O         | -2.898651 | -0.203730 | -0.123230 | O         | 2.161825  | -0.969789 | -0.352686 | O         | -2.879910 | -0.531460 | 0.029516  |
| H         | -1.814439 | -0.797944 | -1.215003 | H         | -3.425515 | -0.961475 | 0.141230  | H         | 1.413921  | -1.533378 | -0.565604 | H         | -2.920758 | -0.655456 | 0.981639  |
| <b>53</b> |           |           |           | <b>54</b> |           |           |           | <b>55</b> |           |           |           | <b>56</b> |           |           |           |
| C         | 1.872952  | 0.122605  | -0.339390 | C         | 1.557526  | -0.403859 | -0.310485 | C         | 1.547888  | -0.409100 | 0.284442  | C         | -1.423481 | -0.032054 | 0.491363  |
| H         | 2.892849  | 0.448733  | -0.106836 | H         | 1.519061  | -0.413659 | -1.400792 | H         | 1.484895  | -0.440818 | 1.379480  | H         | -0.950090 | -0.860722 | 1.031032  |
| O         | 1.710108  | -1.255152 | -0.003368 | O         | 2.937480  | -0.286943 | 0.020283  | H         | 1.161503  | -1.360133 | -0.098348 | H         | -1.609368 | 0.758795  | 1.219579  |
| C         | 0.869849  | 1.048917  | 0.337446  | C         | 0.725216  | 0.754781  | 0.226152  | C         | 0.726002  | 0.754629  | -0.239442 | C         | -0.518418 | 0.486223  | -0.618998 |
| H         | 0.921420  | 0.896962  | 1.422009  | H         | 0.754388  | 0.742552  | 1.321686  | H         | 1.212449  | 1.676926  | 0.083293  | H         | -1.066242 | 1.254153  | -1.168280 |
| H         | 1.202740  | 2.076192  | 0.163901  | H         | 1.204364  | 1.684068  | -0.087455 | H         | 0.764473  | 0.748682  | -1.331858 | H         | -0.325635 | -0.318072 | -1.338402 |
| C         | -0.577185 | 0.920395  | -0.141246 | C         | -0.730316 | 0.742674  | -0.248154 | C         | -0.726002 | 0.754629  | 0.239442  | C         | 0.809818  | 1.066395  | -0.125540 |
| H         | -0.622148 | 1.073232  | -1.222802 | H         | -0.769771 | 0.721333  | -1.340226 | H         | -1.212449 | 1.676927  | -0.083293 | H         | 0.610788  | 1.878407  | 0.581231  |
| H         | -1.174584 | 1.716706  | 0.308932  | H         | -1.209920 | 1.676665  | 0.061422  | H         | -0.764473 | 0.748682  | 1.331858  | H         | 1.340863  | 1.508058  | -0.971068 |
| H         | 1.875607  | -1.360815 | 0.937353  | H         | 3.029898  | -0.326397 | 0.976011  | C         | -1.547888 | -0.409100 | -0.284442 | C         | 1.741217  | 0.065452  | 0.552115  |
| H         | 1.755100  | 0.169884  | -1.423123 | H         | 1.162244  | -1.364383 | 0.037159  | H         | -1.161503 | -1.360133 | 0.098348  | H         | 1.283391  | -0.341828 | 1.459956  |
| C         | -1.250080 | -0.398919 | 0.193961  | C         | -1.549583 | -0.421259 | 0.296857  | H         | -1.484896 | -0.440817 | -1.379480 | H         | 2.658235  | 0.570465  | 0.854670  |
| H         | -0.783943 | -1.220714 | -0.351958 | H         | -1.163990 | -1.373150 | -0.066522 | O         | 2.896487  | -0.217742 | -0.137894 | O         | -2.708964 | -0.421326 | 0.018722  |
| H         | -1.140288 | -0.607676 | 1.266391  | H         | -1.483754 | -0.440231 | 1.392633  | H         | 3.428085  | -0.955900 | 0.169074  | H         | -2.601217 | -1.119619 | -0.632751 |
| O         | -2.631450 | -0.272077 | -0.149963 | O         | -2.907229 | -0.385434 | -0.126947 | O         | -2.896487 | -0.217742 | 0.137894  | O         | 2.158328  | -0.988996 | -0.311365 |
| H         | -3.049238 | -1.132661 | -0.071853 | H         | -3.301583 | 0.438186  | 0.173177  | H         | -3.428086 | -0.955900 | -0.169075 | H         | 1.409550  | -1.563154 | -0.488474 |
| <b>57</b> |           |           |           | <b>58</b> |           |           |           | <b>59</b> |           |           |           | <b>60</b> |           |           |           |
| C         | -1.898427 | 0.131031  | -0.313777 | C         | 1.259610  | -0.409541 | 0.220868  | C         | -1.388068 | -0.425687 | 0.531321  | C         | -1.550139 | -0.418324 | 0.290961  |
| H         | -2.906008 | 0.443420  | -0.016992 | H         | 1.183488  | -0.558451 | 1.306295  | H         | -2.051790 | -0.494359 | 1.400982  | H         | -1.163508 | -1.367788 | -0.077710 |
| H         | -1.839536 | 0.214307  | -1.400280 | H         | 0.772675  | -1.255626 | -0.256028 | O         | -2.145993 | -0.480125 | -0.677270 | H         | -1.490513 | -0.446136 | 1.386414  |
| C         | -0.867570 | 1.046916  | 0.334556  | C         | 0.579535  | 0.898504  | -0.168383 | C         | -0.536922 | 0.836713  | 0.632818  | C         | -0.726182 | 0.748178  | -0.241583 |
| H         | -1.196113 | 2.075999  | 0.162641  | H         | 0.606166  | 0.998991  | -1.256610 | H         | -1.204605 | 1.703220  | 0.579556  | H         | -1.203924 | 1.681069  | 0.073763  |
| H         | -0.891952 | 0.903565  | 1.421202  | H         | 1.177021  | 1.724625  | 0.232844  | H         | -0.076629 | 0.870243  | 1.625535  | H         | -0.762787 | 0.734733  | -1.333998 |
| C         | 0.568490  | 0.896365  | -0.175894 | C         | -0.858876 | 1.055212  | 0.331711  | C         | 0.543120  | 0.958107  | -0.448629 | C         | 0.726182  | 0.748178  | 0.241583  |
| H         | 1.165199  | 1.740898  | 0.176009  | H         | -1.182127 | 2.085088  | 0.154898  | H         | 0.779465  | 2.012102  | -0.615351 | H         | 0.762787  | 0.734733  | 1.333998  |
| H         | 0.568453  | 0.949805  | -1.270322 | H         | -0.895097 | 0.912146  | 1.418113  | H         | 0.155313  | 0.569111  | -1.392098 | H         | 1.203924  | 1.681069  | -0.073763 |
| C         | 1.279294  | -0.378866 | 0.266003  | C         | -1.883840 | 0.137497  | -0.324359 | H         | -2.764109 | 0.255886  | -0.683417 | C         | 1.550139  | -0.418325 | -0.290961 |
| H         | 0.785702  | -1.262025 | -0.142788 | H         | -1.795086 | 0.194475  | -1.410355 | H         | -0.752928 | -1.307337 | 0.517754  | H         | 1.490513  | -0.446136 | -1.386414 |
| H         | 1.246755  | -0.459238 | 1.354384  | H         | -2.894868 | 0.468285  | -0.061229 | C         | 1.849917  | 0.262910  | -0.113543 | H         | 1.163508  | -1.367788 | 0.077710  |
| O         | -1.710162 | -1.254917 | -0.034365 | O         | 2.620748  | -0.454360 | -0.197982 | H         | 2.578576  | 0.451909  | -0.909957 | O         | -2.905029 | -0.377049 | -0.141715 |

|           |           |           |           |           |           |           |           |           |           |           |           |           |           |           |           |
|-----------|-----------|-----------|-----------|-----------|-----------|-----------|-----------|-----------|-----------|-----------|-----------|-----------|-----------|-----------|-----------|
| H         | -1.822573 | -1.395987 | 0.909653  | H         | 3.093076  | 0.276367  | 0.210406  | H         | 2.256988  | 0.676314  | 0.818214  | H         | -3.305930 | 0.435395  | 0.179253  |
| O         | 2.666307  | -0.363714 | -0.069947 | O         | -1.718524 | -1.242619 | -0.006279 | O         | 1.623042  | -1.139723 | 0.028511  | O         | 2.905029  | -0.377049 | 0.141715  |
| H         | 2.750178  | -0.434369 | -1.024332 | H         | -1.861619 | -1.360091 | 0.936728  | H         | 2.455045  | -1.570562 | 0.237051  | H         | 3.305930  | 0.435395  | -0.179253 |
| <b>61</b> |           |           |           | <b>62</b> |           |           |           | <b>63</b> |           |           |           | <b>64</b> |           |           |           |
| C         | -1.555112 | -0.409220 | -0.311409 | C         | 0.234821  | 1.554536  | -0.350029 | C         | 1.966072  | 0.107449  | -0.199606 | C         | 1.354289  | -0.227228 | 0.427128  |
| H         | -1.506721 | -0.419621 | -1.401631 | H         | -0.141307 | 2.573296  | -0.260243 | H         | 2.908208  | 0.347338  | 0.294061  | H         | 0.836303  | -1.182521 | 0.486654  |
| H         | -1.161953 | -1.369042 | 0.040578  | O         | 1.651263  | 1.679826  | -0.427479 | O         | 1.730397  | -1.272394 | 0.076429  | O         | 2.595492  | -0.501380 | -0.213644 |
| C         | -0.729657 | 0.751150  | 0.231875  | C         | -0.234821 | 0.729046  | 0.842939  | C         | 0.871276  | 1.041554  | 0.303196  | C         | 0.519305  | 0.806196  | -0.322840 |
| H         | -1.211509 | 1.679195  | -0.081472 | H         | 0.113680  | 1.214236  | 1.756684  | H         | 0.804727  | 0.959591  | 1.391681  | H         | 1.081936  | 1.744547  | -0.342235 |
| H         | -0.763040 | 0.736632  | 1.327120  | H         | -1.328603 | 0.764685  | 0.877980  | H         | 1.201290  | 2.061980  | 0.091110  | H         | 0.418089  | 0.491663  | -1.366185 |
| C         | 0.729657  | 0.751151  | -0.231875 | C         | 0.234821  | -0.729046 | 0.842939  | C         | -0.509433 | 0.812163  | -0.326006 | C         | -0.863331 | 1.051655  | 0.296679  |
| H         | 1.211509  | 1.679195  | 0.081472  | H         | -0.113680 | -1.214236 | 1.756684  | H         | -0.403850 | 0.482501  | -1.364321 | H         | -1.185463 | 2.073601  | 0.079376  |
| H         | 0.763040  | 0.736633  | -1.327120 | H         | 1.328603  | -0.764685 | 0.877980  | H         | -1.066891 | 1.749616  | -0.362189 | H         | -0.802517 | 0.971975  | 1.385700  |
| C         | 1.555112  | -0.409220 | 0.311409  | H         | 2.031502  | 0.820236  | -0.624108 | H         | 1.084295  | -1.607279 | -0.549562 | H         | 3.110940  | 0.309147  | -0.248153 |
| H         | 1.161953  | -1.369042 | -0.040578 | H         | -0.163121 | 1.148276  | -1.287942 | H         | 2.112362  | 0.257701  | -1.275551 | H         | 1.513135  | 0.110355  | 1.458550  |
| H         | 1.506721  | -0.419622 | 1.401631  | C         | -0.234821 | -1.554536 | -0.350029 | C         | -1.361013 | -0.196175 | 0.426294  | C         | -1.961052 | 0.121971  | -0.208766 |
| O         | -2.938533 | -0.294329 | 0.005188  | H         | 0.163121  | -1.148276 | -1.287942 | H         | -0.845872 | -1.157869 | 0.510508  | H         | -2.905110 | 0.376065  | 0.274190  |
| H         | -3.039542 | -0.324116 | 0.960450  | H         | 0.141307  | -2.573296 | -0.260243 | H         | -1.535574 | 0.168365  | 1.445790  | H         | -2.096588 | 0.263974  | -1.287165 |
| O         | 2.938533  | -0.294329 | -0.005188 | O         | -1.651263 | -1.679826 | -0.427479 | O         | -2.593485 | -0.339747 | -0.277047 | O         | -1.739313 | -1.256139 | 0.083413  |
| H         | 3.039542  | -0.324113 | -0.960451 | H         | -2.031502 | -0.820236 | -0.624108 | H         | -3.155398 | -0.954768 | 0.200154  | H         | -1.115426 | -1.614221 | -0.552097 |
| <b>65</b> |           |           |           |           |           |           |           |           |           |           |           |           |           |           |           |
| C         | 1.260895  | -0.422525 | -0.183169 |           |           |           |           |           |           |           |           |           |           |           |           |
| H         | 1.126842  | -0.680009 | -1.233960 |           |           |           |           |           |           |           |           |           |           |           |           |
| O         | 2.666964  | -0.396049 | 0.029857  |           |           |           |           |           |           |           |           |           |           |           |           |
| C         | 0.597081  | 0.914962  | 0.124352  |           |           |           |           |           |           |           |           |           |           |           |           |
| H         | 0.657474  | 1.105289  | 1.202219  |           |           |           |           |           |           |           |           |           |           |           |           |
| H         | 1.195596  | 1.688541  | -0.361914 |           |           |           |           |           |           |           |           |           |           |           |           |
| C         | -0.859019 | 1.052368  | -0.332018 |           |           |           |           |           |           |           |           |           |           |           |           |
| H         | -0.929866 | 0.894041  | -1.411455 |           |           |           |           |           |           |           |           |           |           |           |           |
| H         | -1.172325 | 2.083886  | -0.148197 |           |           |           |           |           |           |           |           |           |           |           |           |
| H         | 2.837083  | -0.159783 | 0.946000  |           |           |           |           |           |           |           |           |           |           |           |           |
| H         | 0.815021  | -1.230777 | 0.412319  |           |           |           |           |           |           |           |           |           |           |           |           |
| C         | -1.869654 | 0.135215  | 0.350287  |           |           |           |           |           |           |           |           |           |           |           |           |
| H         | -1.719156 | 0.148530  | 1.437223  |           |           |           |           |           |           |           |           |           |           |           |           |
| H         | -2.877302 | 0.504234  | 0.159873  |           |           |           |           |           |           |           |           |           |           |           |           |
| O         | -1.872069 | -1.202467 | -0.142004 |           |           |           |           |           |           |           |           |           |           |           |           |
| H         | -1.068350 | -1.645944 | 0.138370  |           |           |           |           |           |           |           |           |           |           |           |           |

**Table S5**

Enthalpies of formations of most stable HB and F-lin conformers of  $\alpha,\omega$ -alkanediols calculated at the DLPNO-CCSD(T<sub>1</sub>)/CBS//B3LYP-D3(BJ)/def2-TZVPP level using isodesmic-type reactions (at  $T = 298.15$  K, in  $\text{kJ}\cdot\text{mol}^{-1}$ )<sup>a</sup>

| Reaction                                                                                                                                                            | HB conformer           |                                 | $\Delta_{\text{HB}}^{\text{b}}$ | F-lin conformer                 |                                    |
|---------------------------------------------------------------------------------------------------------------------------------------------------------------------|------------------------|---------------------------------|---------------------------------|---------------------------------|------------------------------------|
|                                                                                                                                                                     | $\Delta_r H_m^{\circ}$ | $\Delta_f H_m^{\circ}$          |                                 | $\Delta_f H_m^{\circ}$          | $\Delta_{\text{F-lin}}^{\text{c}}$ |
| <b>1,2-ethanediol (C<sub>2</sub>H<sub>6</sub>O<sub>2</sub>), <math>\Delta_f H_m^{\circ}(\text{g, exp}) = -390.2 \pm 0.6 \text{ kJ}\cdot\text{mol}^{-1}</math></b>   |                        |                                 |                                 |                                 |                                    |
| 1 C <sub>2</sub> H <sub>6</sub> O <sub>2</sub> + 4 CH <sub>4</sub> → 3 C <sub>2</sub> H <sub>6</sub> + 2 H <sub>2</sub> O                                           | -47.8                  | -389.8                          |                                 | -379.2                          |                                    |
| 2 C <sub>2</sub> H <sub>6</sub> O <sub>2</sub> + H <sub>2</sub> → 2 CH <sub>3</sub> OH                                                                              | -13.2                  | -388.6                          |                                 | -378.0                          |                                    |
| 3 C <sub>2</sub> H <sub>6</sub> O <sub>2</sub> + C <sub>2</sub> H <sub>6</sub> → 2 CH <sub>3</sub> CH <sub>2</sub> OH                                               | 5.3                    | -391.4                          |                                 | -380.7                          |                                    |
| 4 C <sub>2</sub> H <sub>6</sub> O <sub>2</sub> + <i>n</i> -C <sub>4</sub> H <sub>10</sub> → 2 CH <sub>3</sub> CH <sub>2</sub> CH <sub>2</sub> OH                    | 6.8                    | -391.3                          |                                 | -380.6                          |                                    |
| 5 C <sub>2</sub> H <sub>6</sub> O <sub>2</sub> + <i>n</i> -C <sub>4</sub> H <sub>10</sub> → 2 CH <sub>3</sub> CH(OH)CH <sub>3</sub>                                 | -29.8                  | -390.1                          |                                 | -379.4                          |                                    |
| 6 C <sub>2</sub> H <sub>6</sub> O <sub>2</sub> + CH <sub>4</sub> → CH <sub>2</sub> (OH) <sub>2</sub> + C <sub>2</sub> H <sub>6</sub>                                | -12.9                  | -389.9                          |                                 | -379.3                          |                                    |
| 7 C <sub>2</sub> H <sub>6</sub> O <sub>2</sub> + C <sub>2</sub> H <sub>6</sub> → HOCH <sub>2</sub> CH(OH)CH <sub>3</sub> + CH <sub>4</sub>                          | -29.6                  | -389.3                          |                                 | -378.7                          |                                    |
| 8 C <sub>2</sub> H <sub>6</sub> O <sub>2</sub> + C <sub>2</sub> H <sub>6</sub> → HOCH <sub>2</sub> CH <sub>2</sub> CH <sub>2</sub> OH + CH <sub>4</sub>             | -12.5                  | -389.3                          |                                 | -378.6                          |                                    |
| weighted average                                                                                                                                                    |                        | <b>-390.0 ± 2.3<sup>d</sup></b> | -0.2                            | <b>-379.3 ± 2.3<sup>d</sup></b> | <b>-10.9</b>                       |
| <b>1,3-propanediol (C<sub>3</sub>H<sub>8</sub>O<sub>2</sub>), <math>\Delta_f H_m^{\circ}(\text{g, exp}) = -411.3 \pm 1.6 \text{ kJ}\cdot\text{mol}^{-1}</math></b>  |                        |                                 |                                 |                                 |                                    |
| 1 C <sub>3</sub> H <sub>8</sub> O <sub>2</sub> + 5 CH <sub>4</sub> → 4 C <sub>2</sub> H <sub>6</sub> + 2 H <sub>2</sub> O                                           | -35.2                  | -412.1                          |                                 | -407.1                          |                                    |
| 2 C <sub>3</sub> H <sub>8</sub> O <sub>2</sub> + 3 CH <sub>4</sub> → 2 C <sub>2</sub> H <sub>6</sub> + 2 CH <sub>3</sub> OH                                         | 64.2                   | -410.8                          |                                 | -405.9                          |                                    |
| 3 C <sub>3</sub> H <sub>8</sub> O <sub>2</sub> + CH <sub>4</sub> → 2 CH <sub>3</sub> CH <sub>2</sub> OH                                                             | 17.8                   | -413.6                          |                                 | -408.7                          |                                    |
| 4 C <sub>3</sub> H <sub>8</sub> O <sub>2</sub> + C <sub>3</sub> H <sub>8</sub> → 2 CH <sub>3</sub> CH <sub>2</sub> CH <sub>2</sub> OH                               | 8.1                    | -413.5                          |                                 | -408.6                          |                                    |
| 5 C <sub>3</sub> H <sub>8</sub> O <sub>2</sub> + C <sub>3</sub> H <sub>8</sub> → 2 CH <sub>3</sub> CH(OH)CH <sub>3</sub>                                            | -28.5                  | -412.3                          |                                 | -407.4                          |                                    |
| 6 C <sub>3</sub> H <sub>8</sub> O <sub>2</sub> + C <sub>2</sub> H <sub>6</sub> → CH <sub>2</sub> (OH) <sub>2</sub> + <i>n</i> -C <sub>4</sub> H <sub>10</sub>       | -22.6                  | -412.6                          |                                 | -407.7                          |                                    |
| 7 C <sub>3</sub> H <sub>8</sub> O <sub>2</sub> + C <sub>2</sub> H <sub>6</sub> → HOCH <sub>2</sub> CH <sub>2</sub> OH + C <sub>3</sub> H <sub>8</sub>               | 1.6                    | -412.9                          |                                 | -408.0                          |                                    |
| 8 C <sub>3</sub> H <sub>8</sub> O <sub>2</sub> → HOCH <sub>2</sub> CH(OH)CH <sub>3</sub>                                                                            | -17.0                  | -411.6                          |                                 | -406.7                          |                                    |
| weighted average                                                                                                                                                    |                        | <b>-412.4 ± 2.3<sup>d</sup></b> | 1.1                             | <b>-407.5 ± 2.3<sup>d</sup></b> | <b>-3.8</b>                        |
| <b>1,4-butanediol (C<sub>4</sub>H<sub>10</sub>O<sub>2</sub>), <math>\Delta_f H_m^{\circ}(\text{g, exp}) = -425.7 \pm 1.8 \text{ kJ}\cdot\text{mol}^{-1}</math></b>  |                        |                                 |                                 |                                 |                                    |
| 1 C <sub>4</sub> H <sub>10</sub> O <sub>2</sub> + 6 CH <sub>4</sub> → 5 C <sub>2</sub> H <sub>6</sub> + 2 H <sub>2</sub> O                                          | -23.5                  | -433.1                          |                                 | -426.0                          |                                    |
| 2 C <sub>4</sub> H <sub>10</sub> O <sub>2</sub> + 4 CH <sub>4</sub> → 3 C <sub>2</sub> H <sub>6</sub> + 2 CH <sub>3</sub> OH                                        | 76.0                   | -431.8                          |                                 | -424.8                          |                                    |
| 3 C <sub>4</sub> H <sub>10</sub> O <sub>2</sub> + 2 CH <sub>4</sub> → C <sub>2</sub> H <sub>6</sub> + 2 CH <sub>3</sub> CH <sub>2</sub> OH                          | 29.5                   | -434.6                          |                                 | -427.6                          |                                    |
| 4 C <sub>4</sub> H <sub>10</sub> O <sub>2</sub> + C <sub>2</sub> H <sub>6</sub> → 2 CH <sub>3</sub> CH <sub>2</sub> CH <sub>2</sub> OH                              | 8.8                    | -435.0                          |                                 | -428.0                          |                                    |
| 5 C <sub>4</sub> H <sub>10</sub> O <sub>2</sub> + C <sub>2</sub> H <sub>6</sub> → 2 CH <sub>3</sub> CH(OH)CH <sub>3</sub>                                           | -27.7                  | -433.8                          |                                 | -426.8                          |                                    |
| 6 C <sub>4</sub> H <sub>10</sub> O <sub>2</sub> + CH <sub>4</sub> → HOCH <sub>2</sub> CH <sub>2</sub> OH + C <sub>3</sub> H <sub>8</sub>                            | 13.3                   | -434.0                          |                                 | -426.9                          |                                    |
| 7 C <sub>4</sub> H <sub>10</sub> O <sub>2</sub> + CH <sub>4</sub> → HOCH <sub>2</sub> CH(OH)CH <sub>3</sub> + C <sub>2</sub> H <sub>6</sub>                         | -5.3                   | -432.6                          |                                 | -425.6                          |                                    |
| 8 C <sub>4</sub> H <sub>10</sub> O <sub>2</sub> + CH <sub>4</sub> → HOCH <sub>2</sub> CH <sub>2</sub> CH <sub>2</sub> OH + C <sub>2</sub> H <sub>6</sub>            | 11.7                   | -432.5                          |                                 | -425.5                          |                                    |
| weighted average                                                                                                                                                    |                        | <b>-433.4 ± 2.6<sup>d</sup></b> | 7.7                             | <b>-426.4 ± 2.6<sup>d</sup></b> | <b>0.7</b>                         |
| <b>1,5-pentanediol (C<sub>5</sub>H<sub>12</sub>O<sub>2</sub>), <math>\Delta_f H_m^{\circ}(\text{g, exp}) = -443.6 \pm 2.6 \text{ kJ}\cdot\text{mol}^{-1}</math></b> |                        |                                 |                                 |                                 |                                    |
| 1 C <sub>5</sub> H <sub>12</sub> O <sub>2</sub> + 7 CH <sub>4</sub> → 6 C <sub>2</sub> H <sub>6</sub> + 2 H <sub>2</sub> O                                          | -17.3                  | -448.8                          |                                 | -446.0                          |                                    |
| 2 C <sub>5</sub> H <sub>12</sub> O <sub>2</sub> + 4 CH <sub>4</sub> → 2 C <sub>2</sub> H <sub>6</sub> + C <sub>3</sub> H <sub>8</sub> + 2 CH <sub>3</sub> OH        | 71.3                   | -448.1                          |                                 | -445.2                          |                                    |
| 3 C <sub>5</sub> H <sub>12</sub> O <sub>2</sub> + 2 CH <sub>4</sub> → C <sub>3</sub> H <sub>8</sub> + 2 CH <sub>3</sub> CH <sub>2</sub> OH                          | 24.8                   | -450.9                          |                                 | -448.0                          |                                    |
| 4 C <sub>5</sub> H <sub>12</sub> O <sub>2</sub> + CH <sub>4</sub> → 2 CH <sub>3</sub> CH <sub>2</sub> CH <sub>2</sub> OH                                            | 15.1                   | -450.8                          |                                 | -447.9                          |                                    |
| 5 C <sub>5</sub> H <sub>12</sub> O <sub>2</sub> + CH <sub>4</sub> → 2 CH <sub>3</sub> CH(OH)CH <sub>3</sub>                                                         | -21.5                  | -449.5                          |                                 | -446.7                          |                                    |
| 6 C <sub>5</sub> H <sub>12</sub> O <sub>2</sub> + CH <sub>4</sub> → HOCH <sub>2</sub> CH <sub>2</sub> OH + <i>n</i> -C <sub>4</sub> H <sub>10</sub>                 | 8.3                    | -449.7                          |                                 | -446.8                          |                                    |
| 7 C <sub>5</sub> H <sub>12</sub> O <sub>2</sub> + CH <sub>4</sub> → HOCH <sub>2</sub> CH(OH)CH <sub>3</sub> + C <sub>3</sub> H <sub>8</sub>                         | -10.0                  | -448.9                          |                                 | -446.0                          |                                    |
| 8 C <sub>5</sub> H <sub>12</sub> O <sub>2</sub> + CH <sub>4</sub> → HOCH <sub>2</sub> CH <sub>2</sub> CH <sub>2</sub> OH + C <sub>3</sub> H <sub>8</sub>            | 7.0                    | -448.8                          |                                 | -446.6                          |                                    |
| weighted average                                                                                                                                                    |                        | <b>-449.4 ± 2.4<sup>d</sup></b> | 5.8                             | <b>-446.6 ± 2.4<sup>d</sup></b> | <b>3.0</b>                         |
| <b>1,6-hexanediol (C<sub>6</sub>H<sub>14</sub>O<sub>2</sub>), <math>\Delta_f H_m^{\circ}(\text{g, exp}) = -467.7 \pm 2.5 \text{ kJ}\cdot\text{mol}^{-1}</math></b>  |                        |                                 |                                 |                                 |                                    |

|                                                                                                                                                       |                                                                       |       |                    |        |                                      |        |
|-------------------------------------------------------------------------------------------------------------------------------------------------------|-----------------------------------------------------------------------|-------|--------------------|--------|--------------------------------------|--------|
| 1                                                                                                                                                     | $C_6H_{14}O_2 + 8 CH_4 \rightarrow 7 C_2H_6 + 2 H_2O$                 | -6.6  | -469.0             | -466.1 |                                      |        |
| 2                                                                                                                                                     | $C_6H_{14}O_2 + 4 CH_4 \rightarrow C_2H_6 + 2 C_3H_8 + 2 CH_3OH$      | 71.0  | -468.8             | -465.8 |                                      |        |
| 3                                                                                                                                                     | $C_6H_{14}O_2 + 2 CH_4 \rightarrow n-C_4H_{10} + 2 CH_3CH_2OH$        | 24.3  | -471.0             | -468.1 |                                      |        |
| 4                                                                                                                                                     | $C_6H_{14}O_2 + 2 CH_4 \rightarrow 2 CH_3CH_2CH_2OH + C_2H_6$         | 25.8  | -471.0             | -468.0 |                                      |        |
| 5                                                                                                                                                     | $C_6H_{14}O_2 + 2 CH_4 \rightarrow 2 CH_3CH(OH)CH_3 + C_2H_6$         | -10.8 | -469.7             | -466.8 |                                      |        |
| 6                                                                                                                                                     | $C_6H_{14}O_2 + CH_4 \rightarrow HOCH_2CH_2OH + n-C_5H_{12}$          | 7.9   | -469.7             | -466.7 |                                      |        |
| 7                                                                                                                                                     | $C_6H_{14}O_2 + CH_4 \rightarrow HOCH_2CH(OH)CH_3 + n-C_4H_{10}$      | -10.5 | -469.0             | -466.0 |                                      |        |
| 8                                                                                                                                                     | $C_6H_{14}O_2 + CH_4 \rightarrow HOCH_2CH_2CH_2OH + n-C_4H_{10}$      | 6.5   | -468.9             | -466.0 |                                      |        |
|                                                                                                                                                       | weighted average                                                      |       | $-469.7 \pm 2.1^d$ | $2.0$  | <b><math>-466.7 \pm 2.1^d</math></b> | $-1.0$ |
| <b>1,7-heptanediol (<math>C_7H_{16}O_2</math>), <math>\Delta_f H_m^\circ(g, \text{exp}) = -487.9 \pm 1.6 \text{ kJ}\cdot\text{mol}^{-1}</math></b>    |                                                                       |       |                    |        |                                      |        |
| 1                                                                                                                                                     | $C_7H_{16}O_2 + 9 CH_4 \rightarrow 8 C_2H_6 + 2 H_2O$                 | 8.2   | -493.3             | -487.1 |                                      |        |
| 2                                                                                                                                                     | $C_7H_{16}O_2 + 4 CH_4 \rightarrow 3 C_3H_8 + 2 CH_3OH$               | 74.8  | -493.6             | -487.4 |                                      |        |
| 3                                                                                                                                                     | $C_7H_{16}O_2 + 2 CH_4 \rightarrow n-C_5H_{12} + 2 CH_3CH_2OH$        | 28.1  | -495.1             | -488.9 |                                      |        |
| 4                                                                                                                                                     | $C_7H_{16}O_2 + 2 CH_4 \rightarrow 2 CH_3CH_2CH_2OH + C_3H_8$         | 29.6  | -495.8             | -489.6 |                                      |        |
| 5                                                                                                                                                     | $C_7H_{16}O_2 + 2 CH_4 \rightarrow 2 CH_3CH(OH)CH_3 + C_3H_8$         | -6.9  | -494.6             | -488.3 |                                      |        |
| 6                                                                                                                                                     | $C_7H_{16}O_2 + CH_4 \rightarrow HOCH_2CH_2OH + n-C_6H_{14}$          | 11.5  | -494.0             | -487.7 |                                      |        |
| 7                                                                                                                                                     | $C_7H_{16}O_2 + CH_4 \rightarrow HOCH_2CH(OH)CH_3 + n-C_5H_{12}$      | -6.8  | -493.1             | -486.9 |                                      |        |
| 8                                                                                                                                                     | $C_7H_{16}O_2 + CH_4 \rightarrow HOCH_2CH_2CH_2OH + n-C_5H_{12}$      | 10.2  | -493.1             | -486.8 |                                      |        |
|                                                                                                                                                       | weighted average                                                      |       | $-494.1 \pm 2.4^d$ | $6.2$  | <b><math>-487.9 \pm 2.4^d</math></b> | $0.0$  |
| <b>1,8-octanediol (<math>C_8H_{18}O_2</math>), <math>\Delta_f H_m^\circ(g, \text{exp}) = -509.9 \pm 0.9 \text{ kJ}\cdot\text{mol}^{-1}</math></b>     |                                                                       |       |                    |        |                                      |        |
| 1                                                                                                                                                     | $C_8H_{18}O_2 + 10 CH_4 \rightarrow 9 C_2H_6 + 2 H_2O$                | 17.6  | -512.2             | -507.7 |                                      |        |
| 2                                                                                                                                                     | $C_8H_{18}O_2 + 4 CH_4 \rightarrow 2 C_3H_8 + n-C_4H_{10} + 2 CH_3OH$ | 73.0  | -512.4             | -507.9 |                                      |        |
| 3                                                                                                                                                     | $C_8H_{18}O_2 + 2 CH_4 \rightarrow n-C_6H_{14} + 2 CH_3CH_2OH$        | 26.2  | -514.0             | -509.5 |                                      |        |
| 4                                                                                                                                                     | $C_8H_{18}O_2 + 2 CH_4 \rightarrow 2 CH_3CH_2CH_2OH + n-C_4H_{10}$    | 27.8  | -514.6             | -510.1 |                                      |        |
| 5                                                                                                                                                     | $C_8H_{18}O_2 + 2 CH_4 \rightarrow 2 CH_3CH(OH)CH_3 + n-C_4H_{10}$    | -8.7  | -513.4             | -508.9 |                                      |        |
| 6                                                                                                                                                     | $C_8H_{18}O_2 + CH_4 \rightarrow HOCH_2CH_2OH + n-C_7H_{16}$          | 9.8   | -512.7             | -508.2 |                                      |        |
| 7                                                                                                                                                     | $C_8H_{18}O_2 + CH_4 \rightarrow HOCH_2CH(OH)CH_3 + n-C_6H_{14}$      | -8.6  | -512.0             | -507.5 |                                      |        |
| 8                                                                                                                                                     | $C_8H_{18}O_2 + CH_4 \rightarrow HOCH_2CH_2CH_2OH + n-C_6H_{14}$      | 8.4   | -511.9             | -507.4 |                                      |        |
|                                                                                                                                                       | weighted average                                                      |       | $-512.9 \pm 2.4^d$ | $3.0$  | <b><math>-508.5 \pm 2.4^d</math></b> | $-1.4$ |
| <b>1,9-nonanediol (<math>C_9H_{20}O_2</math>), <math>\Delta_f H_m^\circ(g, \text{exp}) = -531.0 \pm 0.8 \text{ kJ}\cdot\text{mol}^{-1}</math></b>     |                                                                       |       |                    |        |                                      |        |
| 1                                                                                                                                                     | $C_9H_{20}O_2 + 11 CH_4 \rightarrow 10 C_2H_6 + 2 H_2O$               | 32.0  | -536.1             | -528.1 |                                      |        |
| 2                                                                                                                                                     | $C_9H_{20}O_2 + 4 CH_4 \rightarrow C_3H_8 + 2 n-C_4H_{10} + 2 CH_3OH$ | 76.2  | -536.2             | -528.2 |                                      |        |
| 3                                                                                                                                                     | $C_9H_{20}O_2 + 2 CH_4 \rightarrow n-C_7H_{16} + 2 CH_3CH_2OH$        | 29.4  | -537.7             | -529.7 |                                      |        |
| 4                                                                                                                                                     | $C_9H_{20}O_2 + 2 CH_4 \rightarrow 2 CH_3CH_2CH_2OH + n-C_5H_{12}$    | 31.1  | -538.3             | -530.3 |                                      |        |
| 5                                                                                                                                                     | $C_9H_{20}O_2 + 2 CH_4 \rightarrow 2 CH_3CH(OH)CH_3 + n-C_5H_{12}$    | -5.5  | -537.1             | -529.1 |                                      |        |
| 6                                                                                                                                                     | $C_9H_{20}O_2 + CH_4 \rightarrow HOCH_2CH_2OH + n-C_8H_{18}$          | 13.0  | -536.5             | -528.4 |                                      |        |
| 7                                                                                                                                                     | $C_9H_{20}O_2 + CH_4 \rightarrow HOCH_2CH(OH)CH_3 + n-C_7H_{16}$      | -5.4  | -535.7             | -527.7 |                                      |        |
| 8                                                                                                                                                     | $C_9H_{20}O_2 + CH_4 \rightarrow HOCH_2CH_2CH_2OH + n-C_7H_{16}$      | 11.6  | -535.6             | -527.6 |                                      |        |
|                                                                                                                                                       | weighted average                                                      |       | $-536.7 \pm 2.3^d$ | $5.7$  | <b><math>-528.7 \pm 2.3^d</math></b> | $-2.3$ |
| <b>1,10-decanediol (<math>C_{10}H_{22}O_2</math>), <math>\Delta_f H_m^\circ(g, \text{exp}) = -551.8 \pm 0.9 \text{ kJ}\cdot\text{mol}^{-1}</math></b> |                                                                       |       |                    |        |                                      |        |
| 1                                                                                                                                                     | $C_{10}H_{22}O_2 + 12 CH_4 \rightarrow 11 C_2H_6 + 2 H_2O$            | 41.1  | -554.7             | -549.0 |                                      |        |
| 2                                                                                                                                                     | $C_{10}H_{22}O_2 + 4 CH_4 \rightarrow 3 n-C_4H_{10} + 2 CH_3OH$       | 74.1  | -554.8             | -549.1 |                                      |        |
| 3                                                                                                                                                     | $C_{10}H_{22}O_2 + 2 CH_4 \rightarrow n-C_8H_{18} + 2 CH_3CH_2OH$     | 27.4  | -556.3             | -550.6 |                                      |        |
| 4                                                                                                                                                     | $C_{10}H_{22}O_2 + 2 CH_4 \rightarrow 2 CH_3CH_2CH_2OH + n-C_6H_{14}$ | 29.0  | -556.9             | -551.3 |                                      |        |
| 5                                                                                                                                                     | $C_{10}H_{22}O_2 + 2 CH_4 \rightarrow 2 CH_3CH(OH)CH_3 + n-C_6H_{14}$ | -7.5  | -555.7             | -550.0 |                                      |        |
| 6                                                                                                                                                     | $C_{10}H_{22}O_2 + CH_4 \rightarrow HOCH_2CH_2OH + n-C_9H_{20}$       | 10.9  | -554.5             | -548.8 |                                      |        |
| 7                                                                                                                                                     | $C_{10}H_{22}O_2 + CH_4 \rightarrow HOCH_2CH(OH)CH_3 + n-C_8H_{18}$   | -7.5  | -554.2             | -548.6 |                                      |        |
| 8                                                                                                                                                     | $C_{10}H_{22}O_2 + CH_4 \rightarrow HOCH_2CH_2CH_2OH + n-C_8H_{18}$   | 9.6   | -554.2             | -548.5 |                                      |        |
|                                                                                                                                                       | weighted average                                                      |       | $-555.2 \pm 2.4^d$ | $3.4$  | <b><math>-549.5 \pm 2.4^d</math></b> | $-2.3$ |

<sup>a</sup> Recommended values are given in bold.

<sup>b</sup> Difference between the experimental enthalpy of formation and that calculated for HB conformer.

<sup>c</sup> Difference between the experimental enthalpy of formation and that calculated for F-lin conformer.

<sup>d</sup> The uncertainty was defined as  $s_d \times t$ , where  $s_d$  is the standard deviation from the weighted average value and  $t$  is Student's coefficient for the 95% confidence level.

### *Transpiration method: Vapor pressure measurements*

Absolute vapor pressures were measured using the transpiration method<sup>1</sup>. The main idea of this method is to saturate the gas stream flowing over the sample and to determine the amount of compound transferred by the gas within a given time. Approximately 0.5 to 0.8 g of the sample is mixed with glass beads (diameter 1 mm) and placed in the thermostatted U-shaped saturator. The glass beads are needed to enlarge the contact area between gas and sample. A stream of nitrogen at a well-defined flow rate was passed through the saturator at constant temperature ( $\pm 0.1$  K) maintained by Julabo FP51-SL refrigerated circulator, and the transported material was collected in a cold trap. The amount of condensed substance was usually determined by GC using a suitable n-alkane as an internal standard. The saturation vapor pressure  $p_i$  at each temperature  $T_i$  was calculated from the amount of condensate collected within a definite period of time:

$$p_i = m_i \cdot R \cdot T_a / V \cdot M_i ; \quad V = (n_{N_2} + n_i) \cdot R \cdot T_a / P_a \quad (S1)$$

where  $V$  is the volume of the gas phase consisting of the  $n_{N_2}$  moles of the carrier gas and  $n_i$  mole of gaseous compound under study (with the molar mass  $M_i$ ) at the atmospheric pressure  $P_a$  and the ambient temperature  $T_a$ . The volume of the carrier gas  $V_{N_2}$  was determined by the digital flow rate sensor from integration with a microcontroller. We used the Honeywell S&C - HAFBLF0200C2AX5 digital flow rate sensor with uncertainty at the level of 2.5 %. The flow rate of the nitrogen stream was also controlled by using a soap bubble flow meter (HP soap film flowmeter (model 0101-0113)) and optimized in order to reach the saturation equilibrium of the transporting gas at each temperature under study. The volume of the carrier gas  $V_{N_2}$  was read from the digital flow sensor. The amount of the compound under investigation  $n_i$  in the carrier gas was estimated at each temperature using the ideal gas law.

Before starting the vapor pressure measurements, the sample was first pre-conditioned at 310-320 K (within about one hour) in order to remove possible traces of water. The saturator was then kept at 310-315 K (to remove possible traces of volatile compounds). To ensure that preconditioning was completed at the selected temperature, three samples were taken sequentially during sample rinsing and analyzed by GC. A constant vapor pressure at this temperature indicated that the transpiration experiments could begin. GC analysis of the transported material did not reveal any additional contamination. The absence of impurities and decomposition products was re-checked by GC analysis of the saturator content at the end of the entire series of experiments.

The procedure for calculating the expanded uncertainties (0.95 level of confidence) of the vaporization enthalpies from the transpiration method includes uncertainties from the experimental transpiration conditions, uncertainties in the vapor pressure and uncertainties in the temperature adjustment to  $T = 298.15$  K, as described elsewhere<sup>2,3</sup>.

The uncertainties of the  $\Delta_i^g H_m^o(298.15 \text{ K})$ -values derived from the vapor pressures reported in the literature include uncertainties from the fitting equation and uncertainties from temperature adjustment to the reference temperature. Uncertainties in the temperature adjustment of vaporization enthalpies to  $T = 298.15$  K are estimated to account with 20% to the total adjustment.

## Absolute vapor pressures

The experimental absolute vapor pressures measured in this work are given in Table S6.

**Table S6.** Absolute vapor pressures  $p$ , and standard molar vaporization enthalpies and entropies determined using the transpiration method

| $T/$<br>K <sup>a</sup>                                                                                                               | $m/$<br>mg <sup>b</sup> | $V(\text{N}_2)^c /$<br>dm <sup>3</sup> | $T_a/$<br>K <sup>d</sup> | Flow/<br>dm <sup>3</sup> ·h <sup>-1</sup> | $p/$<br>Pa <sup>e</sup> | $u(p)/$<br>Pa <sup>f</sup> | $\Delta_l^g H_m^o/$<br>kJ·mol <sup>-1</sup> | $\Delta_l^g S_m^o/$<br>J·K <sup>-1</sup> ·mol <sup>-1</sup> |
|--------------------------------------------------------------------------------------------------------------------------------------|-------------------------|----------------------------------------|--------------------------|-------------------------------------------|-------------------------|----------------------------|---------------------------------------------|-------------------------------------------------------------|
| 1,5-pentanediol (liq)                                                                                                                |                         |                                        |                          |                                           |                         |                            |                                             |                                                             |
| $\Delta_l^g H_m^o(298.15 \text{ K}) = (87.1 \pm 0.5) \text{ kJ} \cdot \text{mol}^{-1}$                                               |                         |                                        |                          |                                           |                         |                            |                                             |                                                             |
| $\Delta_l^g S_m^o(298.15 \text{ K}) = (182.8 \pm 1.0) \text{ J} \cdot \text{K}^{-1} \cdot \text{mol}^{-1}$                           |                         |                                        |                          |                                           |                         |                            |                                             |                                                             |
| $\Delta_l^g G_m^o(298.15 \text{ K}) = (32.6 \pm 0.1) \text{ kJ} \cdot \text{mol}^{-1}$                                               |                         |                                        |                          |                                           |                         |                            |                                             |                                                             |
| $\ln(p/p_{\text{ref}}) = \frac{373.1}{R} - \frac{115281.3}{RT} - \frac{94.6}{R} \ln \frac{T}{298.15}; p_{\text{ref}} = 1 \text{ Pa}$ |                         |                                        |                          |                                           |                         |                            |                                             |                                                             |
| 303.4                                                                                                                                | 0.65                    | 43.22                                  | 296.1                    | 3.39                                      | 0.36                    | 0.01                       | 86.6                                        | 181.3                                                       |
| 308.2                                                                                                                                | 0.84                    | 33.22                                  | 296.1                    | 3.39                                      | 0.61                    | 0.02                       | 86.1                                        | 179.7                                                       |
| 313.1                                                                                                                                | 1.79                    | 42.04                                  | 296.1                    | 3.39                                      | 1.03                    | 0.03                       | 85.7                                        | 178.1                                                       |
| 318.3                                                                                                                                | 0.14                    | 1.921                                  | 296.1                    | 3.39                                      | 1.72                    | 0.05                       | 85.2                                        | 176.4                                                       |
| 323.2                                                                                                                                | 1.39                    | 11.50                                  | 296.1                    | 3.39                                      | 2.90                    | 0.08                       | 84.7                                        | 175.3                                                       |
| 328.2                                                                                                                                | 1.67                    | 8.673                                  | 296.1                    | 3.39                                      | 4.63                    | 0.12                       | 84.2                                        | 173.7                                                       |
| 333.2                                                                                                                                | 1.55                    | 5.057                                  | 296.1                    | 3.39                                      | 7.39                    | 0.21                       | 83.8                                        | 172.3                                                       |
| 336.2                                                                                                                                | 1.36                    | 3.390                                  | 296.1                    | 3.39                                      | 9.70                    | 0.27                       | 83.5                                        | 171.5                                                       |
| 339.2                                                                                                                                | 1.37                    | 2.627                                  | 296.1                    | 3.39                                      | 12.60                   | 0.34                       | 83.2                                        | 170.7                                                       |
| 342.2                                                                                                                                | 1.33                    | 1.978                                  | 296.1                    | 3.39                                      | 16.24                   | 0.43                       | 82.9                                        | 169.8                                                       |
| 345.2                                                                                                                                | 1.48                    | 1.695                                  | 296.1                    | 3.39                                      | 21.01                   | 0.55                       | 82.6                                        | 169.0                                                       |
| 348.2                                                                                                                                | 1.39                    | 1.243                                  | 296.1                    | 3.39                                      | 26.84                   | 0.70                       | 82.3                                        | 168.2                                                       |
| 351.2                                                                                                                                | 1.27                    | 0.904                                  | 296.1                    | 3.39                                      | 33.86                   | 0.87                       | 82.1                                        | 167.3                                                       |
| 1,6-hexanediol (cr)                                                                                                                  |                         |                                        |                          |                                           |                         |                            |                                             |                                                             |
| $\Delta_{\text{cr}}^g H_m^o(298.15 \text{ K}) = (111.9 \pm 0.7) \text{ kJ} \cdot \text{mol}^{-1}$                                    |                         |                                        |                          |                                           |                         |                            |                                             |                                                             |
| $\Delta_{\text{cr}}^g S_m^o(298.15 \text{ K}) = (255.5 \pm 2.0) \text{ J} \cdot \text{K}^{-1} \cdot \text{mol}^{-1}$                 |                         |                                        |                          |                                           |                         |                            |                                             |                                                             |
| $\Delta_{\text{cr}}^g G_m^o(298.15 \text{ K}) = (35.7 \pm 0.1) \text{ kJ} \cdot \text{mol}^{-1}$                                     |                         |                                        |                          |                                           |                         |                            |                                             |                                                             |
| $\ln(p/p_{\text{ref}}) = \frac{381.4}{R} - \frac{120884.1}{RT} - \frac{30.1}{R} \ln \frac{T}{298.15}; p_{\text{ref}} = 1 \text{ Pa}$ |                         |                                        |                          |                                           |                         |                            |                                             |                                                             |
| 290.4                                                                                                                                | 0.12                    | 155.6                                  | 296.0                    | 3.43                                      | 0.0164                  | 0.01                       | 112.1                                       | 256.3                                                       |
| 295.4                                                                                                                                | 0.26                    | 148.5                                  | 296.0                    | 3.43                                      | 0.0360                  | 0.01                       | 112.0                                       | 255.8                                                       |
| 297.3                                                                                                                                | 0.23                    | 101.2                                  | 296.0                    | 3.43                                      | 0.0481                  | 0.01                       | 111.9                                       | 255.6                                                       |
| 300.3                                                                                                                                | 0.43                    | 120.1                                  | 296.0                    | 3.43                                      | 0.0754                  | 0.01                       | 111.8                                       | 255.3                                                       |
| 303.7                                                                                                                                | 0.54                    | 91.20                                  | 296.0                    | 3.43                                      | 0.1233                  | 0.01                       | 111.7                                       | 254.9                                                       |
| 306.5                                                                                                                                | 0.34                    | 38.32                                  | 296.0                    | 2.94                                      | 0.1864                  | 0.01                       | 111.7                                       | 254.7                                                       |
| 308.2                                                                                                                                | 0.61                    | 52.31                                  | 296.0                    | 3.43                                      | 0.2421                  | 0.01                       | 111.6                                       | 254.7                                                       |
| 311.4                                                                                                                                | 0.51                    | 28.52                                  | 296.0                    | 2.94                                      | 0.3751                  | 0.01                       | 111.5                                       | 254.3                                                       |
| 314.2                                                                                                                                | 0.63                    | 24.11                                  | 296.0                    | 2.94                                      | 0.5420                  | 0.02                       | 111.4                                       | 253.9                                                       |
| 1,7-heptanediol (liq)                                                                                                                |                         |                                        |                          |                                           |                         |                            |                                             |                                                             |
| $\Delta_l^g H_m^o(298.15 \text{ K}) = (94.4 \pm 0.4) \text{ kJ} \cdot \text{mol}^{-1}$                                               |                         |                                        |                          |                                           |                         |                            |                                             |                                                             |

$$\Delta_l^g S_m^o(298.15 \text{ K}) = (191.7 \pm 2.0) \text{ J} \cdot \text{K}^{-1} \cdot \text{mol}^{-1}$$

$$\Delta_l^g G_m^o(298.15 \text{ K}) = (37.2 \pm 0.1) \text{ kJ} \cdot \text{mol}^{-1}$$

$$\ln(p/p_{ref}) = \frac{407.0}{R} - \frac{129995.9}{RT} - \frac{119.5}{R} \ln \frac{T}{298.15}; p_{ref} = 1 \text{ Pa}$$

|       |      |       |       |      |       |      |      |       |
|-------|------|-------|-------|------|-------|------|------|-------|
| 336.2 | 0.56 | 5.222 | 298.9 | 2.90 | 2.03  | 0.06 | 89.8 | 177.4 |
| 339.2 | 0.70 | 4.835 | 298.9 | 2.90 | 2.71  | 0.07 | 89.5 | 176.4 |
| 342.2 | 0.91 | 4.738 | 298.9 | 2.90 | 3.63  | 0.10 | 89.1 | 175.4 |
| 345.2 | 0.84 | 3.385 | 300.2 | 2.90 | 4.67  | 0.12 | 88.8 | 174.2 |
| 348.1 | 0.95 | 2.998 | 300.2 | 2.90 | 6.00  | 0.18 | 88.4 | 173.2 |
| 351.2 | 1.48 | 3.483 | 299.7 | 2.82 | 8.03  | 0.23 | 88.0 | 172.3 |
| 354.2 | 1.02 | 1.883 | 299.7 | 2.82 | 10.21 | 0.28 | 87.7 | 171.2 |
| 357.2 | 1.14 | 1.647 | 298.9 | 2.82 | 13.00 | 0.35 | 87.3 | 170.1 |
| 360.2 | 1.19 | 1.365 | 298.9 | 2.82 | 16.45 | 0.44 | 87.0 | 169.0 |
| 363.2 | 1.27 | 1.112 | 298.2 | 2.90 | 21.47 | 0.56 | 86.6 | 168.2 |
| 366.2 | 1.24 | 0.870 | 298.7 | 2.90 | 26.69 | 0.69 | 86.2 | 167.1 |
| 369.2 | 1.37 | 0.749 | 299.3 | 2.90 | 34.50 | 0.89 | 85.9 | 166.4 |
| 373.2 | 1.53 | 0.629 | 300.0 | 2.90 | 45.82 | 1.17 | 85.4 | 165.0 |

#### 1,8-octanediol (liq)

$$\Delta_l^g H_m^o(298.15 \text{ K}) = (99.2 \pm 1.0) \text{ kJ} \cdot \text{mol}^{-1}$$

$$\Delta_l^g S_m^o(298.15 \text{ K}) = (200.7 \pm 1.3) \text{ J} \cdot \text{K}^{-1} \cdot \text{mol}^{-1}$$

$$\Delta_l^g G_m^o(298.15 \text{ K}) = (39.4 \pm 0.1) \text{ kJ} \cdot \text{mol}^{-1}$$

$$\ln(p/p_{ref}) = \frac{428.0}{R} - \frac{138447.3}{RT} - \frac{131.6}{R} \ln \frac{T}{298.15}; p_{ref} = 1 \text{ Pa}$$

|       |      |       |       |      |       |      |      |       |
|-------|------|-------|-------|------|-------|------|------|-------|
| 343.2 | 0.71 | 5.789 | 297.7 | 4.09 | 2.08  | 0.06 | 93.3 | 182.2 |
| 347.2 | 0.82 | 4.563 | 297.7 | 4.09 | 3.06  | 0.08 | 92.8 | 180.8 |
| 352.2 | 0.84 | 2.928 | 297.5 | 4.09 | 4.84  | 0.13 | 92.1 | 178.9 |
| 357.2 | 0.85 | 1.968 | 297.7 | 2.88 | 7.29  | 0.21 | 91.4 | 176.8 |
| 357.3 | 1.02 | 2.384 | 297.5 | 4.09 | 7.23  | 0.21 | 91.4 | 176.7 |
| 360.2 | 0.94 | 1.680 | 297.2 | 2.88 | 9.50  | 0.26 | 91.0 | 175.8 |
| 363.2 | 0.98 | 1.344 | 297.2 | 2.88 | 12.26 | 0.33 | 90.7 | 174.8 |
| 366.2 | 0.98 | 1.056 | 297.7 | 2.88 | 15.76 | 0.42 | 90.3 | 173.7 |
| 369.2 | 1.02 | 0.864 | 297.7 | 2.88 | 19.99 | 0.52 | 89.9 | 172.6 |
| 373.2 | 1.15 | 0.720 | 297.5 | 2.88 | 27.03 | 0.70 | 89.3 | 171.1 |
| 376.2 | 1.47 | 0.720 | 297.5 | 2.88 | 34.54 | 0.89 | 88.9 | 170.2 |
| 379.3 | 1.56 | 0.605 | 297.5 | 2.88 | 43.54 | 1.11 | 88.5 | 169.1 |

#### 1,8-octanediol (cr)

$$\Delta_{cr}^g H_m^o(298.15 \text{ K}) = (132.9 \pm 1.4) \text{ kJ} \cdot \text{mol}^{-1}$$

$$\Delta_{cr}^g S_m^o(298.15 \text{ K}) = (300.9 \pm 4.6) \text{ J} \cdot \text{K}^{-1} \cdot \text{mol}^{-1}$$

$$\Delta_{cr}^g G_m^o(298.15 \text{ K}) = (43.2 \pm 0.1) \text{ kJ} \cdot \text{mol}^{-1}$$

$$\ln(p/p_{ref}) = \frac{434.3}{R} - \frac{144110.8}{RT} - \frac{37.7}{R} \ln \frac{T}{298.15}; p_{ref} = 1 \text{ Pa}$$

|       |      |       |       |      |         |      |       |       |
|-------|------|-------|-------|------|---------|------|-------|-------|
| 304.4 | 0.08 | 165.5 | 299.2 | 5.14 | 0.00813 | 0.01 | 132.6 | 300.1 |
| 308.3 | 0.12 | 130.1 | 299.2 | 5.14 | 0.01582 | 0.01 | 132.5 | 299.6 |
| 313.2 | 0.24 | 114.1 | 299.2 | 5.14 | 0.03646 | 0.01 | 132.3 | 299.2 |
| 317.2 | 0.27 | 68.14 | 298.2 | 5.14 | 0.06741 | 0.01 | 132.2 | 298.5 |
| 320.2 | 0.24 | 39.00 | 299.2 | 5.14 | 0.10665 | 0.01 | 132.0 | 298.1 |
| 322.7 | 0.36 | 37.54 | 299.5 | 5.14 | 0.16421 | 0.01 | 131.9 | 298.2 |
| 328.2 | 0.41 | 18.86 | 299.5 | 5.14 | 0.36658 | 0.01 | 131.7 | 297.4 |
| 331.2 | 0.29 | 9.00  | 298.2 | 5.14 | 0.54814 | 0.02 | 131.6 | 296.8 |

#### 1,9-nonanediol (liq)

$$\Delta_l^g H_m^o(298.15 \text{ K}) = (103.0 \pm 1.0) \text{ kJ} \cdot \text{mol}^{-1}$$

$$\Delta_l^g S_m^o(298.15 \text{ K}) = (205.8 \pm 2.6) \text{ J} \cdot \text{K}^{-1} \cdot \text{mol}^{-1}$$

$$\Delta_l^g G_m^o(298.15 \text{ K}) = (41.6 \pm 0.1) \text{ kJ} \cdot \text{mol}^{-1}$$

$$\ln(p/p_{ref}) = \frac{445.5}{R} - \frac{145899.9}{RT} - \frac{144.0}{R} \ln \frac{T}{298.15}; p_{ref} = 1 \text{ Pa}$$

|       |      |       |       |      |       |      |      |       |
|-------|------|-------|-------|------|-------|------|------|-------|
| 343.2 | 1.34 | 20.92 | 297.2 | 4.47 | 0.99  | 0.03 | 96.5 | 185.3 |
| 348.2 | 0.57 | 5.395 | 297.7 | 3.30 | 1.63  | 0.05 | 95.8 | 183.4 |
| 348.2 | 0.67 | 6.328 | 297.2 | 4.47 | 1.64  | 0.05 | 95.8 | 183.5 |
| 353.2 | 1.06 | 6.179 | 297.2 | 4.47 | 2.64  | 0.07 | 95.0 | 181.5 |
| 354.2 | 0.98 | 5.328 | 297.2 | 3.33 | 2.85  | 0.08 | 94.9 | 180.9 |
| 357.2 | 0.90 | 3.552 | 297.2 | 3.33 | 3.89  | 0.10 | 94.5 | 180.1 |
| 357.2 | 0.92 | 3.774 | 297.2 | 3.33 | 3.76  | 0.10 | 94.5 | 179.8 |
| 358.2 | 0.79 | 2.978 | 297.2 | 4.47 | 4.08  | 0.11 | 94.3 | 179.3 |
| 360.2 | 0.73 | 2.387 | 299.7 | 3.33 | 4.77  | 0.12 | 94.0 | 178.4 |
| 363.2 | 0.75 | 1.832 | 296.9 | 3.33 | 6.30  | 0.18 | 93.6 | 177.3 |
| 363.2 | 0.88 | 2.159 | 297.2 | 4.47 | 6.31  | 0.18 | 93.6 | 177.4 |
| 366.2 | 0.83 | 1.554 | 296.9 | 3.33 | 8.19  | 0.23 | 93.2 | 176.2 |
| 366.2 | 0.73 | 1.388 | 297.2 | 3.33 | 8.13  | 0.23 | 93.2 | 176.2 |
| 368.2 | 0.88 | 1.425 | 297.2 | 3.80 | 9.50  | 0.26 | 92.9 | 175.3 |
| 369.2 | 0.89 | 1.332 | 296.6 | 3.33 | 10.25 | 0.28 | 92.7 | 174.9 |
| 373.2 | 1.00 | 1.055 | 296.2 | 3.33 | 14.51 | 0.39 | 92.2 | 173.5 |
| 373.2 | 1.13 | 1.189 | 296.7 | 3.40 | 14.61 | 0.39 | 92.2 | 173.6 |
| 376.2 | 1.08 | 0.906 | 297.2 | 3.40 | 18.44 | 0.49 | 91.7 | 172.4 |
| 379.2 | 1.07 | 0.736 | 297.2 | 3.40 | 22.51 | 0.59 | 91.3 | 171.0 |

#### 1,9-nonanediol (cr)

$$\Delta_{cr}^g H_m^o(298.15 \text{ K}) = (137.6 \pm 2.2) \text{ kJ} \cdot \text{mol}^{-1}$$

$$\Delta_{cr}^g S_m^o(298.15 \text{ K}) = (312.6 \pm 6.6) \text{ J} \cdot \text{K}^{-1} \cdot \text{mol}^{-1}$$

$$\Delta_{cr}^g G_m^o(298.15 \text{ K}) = (44.4 \pm 0.1) \text{ kJ} \cdot \text{mol}^{-1}$$

$$\ln(p/p_{ref}) = \frac{449.9}{R} - \frac{149961.1}{RT} - \frac{41.5}{R} \ln \frac{T}{298.15}; p_{ref} = 1 \text{ Pa}$$

|       |      |         |       |      |         |      |       |       |
|-------|------|---------|-------|------|---------|------|-------|-------|
| 298.2 | 0.05 | 424.972 | 299.7 | 6.51 | 0.00170 | 0.01 | 137.6 | 312.7 |
| 301.2 | 0.06 | 314.119 | 299.7 | 6.51 | 0.00283 | 0.01 | 137.5 | 312.0 |
| 303.2 | 0.10 | 359.350 | 299.7 | 6.51 | 0.00420 | 0.01 | 137.4 | 311.9 |
| 308.2 | 0.17 | 249.006 | 297.2 | 5.58 | 0.01039 | 0.01 | 137.2 | 311.5 |
| 311.2 | 0.05 | 40.648  | 297.2 | 5.58 | 0.01743 | 0.01 | 137.0 | 311.1 |
| 313.2 | 0.08 | 54.071  | 299.7 | 6.51 | 0.02374 | 0.01 | 137.0 | 310.6 |
| 318.7 | 0.11 | 30.323  | 299.7 | 5.58 | 0.05818 | 0.01 | 136.7 | 309.7 |

#### 1,10-decanediol (cr)

$$\Delta_{cr}^g H_m^o(298.15 \text{ K}) = (147.2 \pm 1.2) \text{ kJ} \cdot \text{mol}^{-1}$$

$$\Delta_{cr}^g S_m^o(298.15 \text{ K}) = (327.7 \pm 3.2) \text{ J} \cdot \text{K}^{-1} \cdot \text{mol}^{-1}$$

$$\Delta_{cr}^g G_m^o(298.15 \text{ K}) = (49.5 \pm 0.1) \text{ kJ} \cdot \text{mol}^{-1}$$

$$\ln(p/p_{ref}) = \frac{468.4}{R} - \frac{160591.6}{RT} - \frac{44.9}{R} \ln \frac{T}{298.15}; p_{ref} = 1 \text{ Pa}$$

|       |      |         |       |      |        |       |       |       |
|-------|------|---------|-------|------|--------|-------|-------|-------|
| 315.5 | 0.11 | 300.207 | 296.0 | 4.90 | 0.0055 | 0.005 | 146.4 | 325.2 |
| 321.2 | 0.10 | 96.936  | 296.0 | 4.90 | 0.0145 | 0.005 | 146.2 | 324.2 |
| 323.3 | 0.18 | 115.489 | 296.0 | 4.90 | 0.0216 | 0.006 | 146.1 | 324.3 |
| 328.1 | 0.39 | 119.576 | 296.0 | 4.90 | 0.0467 | 0.006 | 145.9 | 323.4 |
| 330.5 | 0.33 | 67.920  | 296.0 | 4.90 | 0.0686 | 0.007 | 145.8 | 323.1 |
| 333.0 | 0.64 | 87.700  | 296.0 | 4.90 | 0.1039 | 0.008 | 145.6 | 322.9 |
| 335.7 | 0.34 | 30.813  | 296.0 | 4.90 | 0.1555 | 0.009 | 145.5 | 322.4 |

|       |      |        |       |      |        |       |       |       |
|-------|------|--------|-------|------|--------|-------|-------|-------|
| 335.7 | 0.34 | 30.813 | 296.0 | 4.90 | 0.1555 | 0.009 | 145.5 | 322.4 |
| 338.0 | 0.12 | 7.111  | 296.0 | 4.90 | 0.2285 | 0.011 | 145.4 | 322.3 |
| 338.2 | 0.34 | 20.597 | 296.0 | 4.90 | 0.2353 | 0.011 | 145.4 | 322.3 |
| 339.6 | 0.37 | 18.267 | 296.0 | 4.90 | 0.2847 | 0.012 | 145.3 | 321.9 |
| 341.1 | 0.30 | 11.933 | 296.0 | 4.90 | 0.3532 | 0.014 | 145.3 | 321.6 |
| 343.7 | 0.58 | 15.856 | 296.0 | 4.90 | 0.5196 | 0.018 | 145.2 | 321.2 |

<sup>a</sup> Saturation temperature measured with the standard uncertainty ( $u(T) = 0.1$  K).

<sup>b</sup> Mass of transferred sample condensed at  $T = 243$  K.

<sup>c</sup> Volume of nitrogen ( $u(V) = 0.005$  dm<sup>3</sup>) used to transfer  $m$  ( $u(m) = 0.0001$  g) of the sample. Uncertainties are given as standard uncertainties.

<sup>d</sup>  $T_a$  is the temperature of the soap bubble meter used for measurement of the gas flow.

<sup>e</sup> Vapor pressure at temperature  $T$ , calculated from the  $m$  and the residual vapor pressure at the condensation temperature calculated by an iteration procedure.

<sup>f</sup> Standard uncertainties were calculated with  $u(p_i/\text{Pa}) = 0.025 + 0.025(p_i/\text{Pa})$  for pressures from 5 to 3000 Pa. The standard uncertainties for  $T$ ,  $V$ ,  $p$ ,  $m$ , are standard uncertainties with 0.683 confidence level. Uncertainty of the vaporization/sublimation enthalpy  $U(\Delta_{l,cr}^g H_m^o)$  is the expanded uncertainty (0.95 level of confidence) calculated according to procedure described elsewhere <sup>2,3</sup>. Uncertainties include uncertainties from the experimental conditions and the fitting equation, vapor pressures, and uncertainties from adjustment of vaporization enthalpies to the reference temperature  $T = 298.15$  K.

The vapor pressure-temperature dependencies were fitted by the following equation <sup>1</sup>:

$$R \cdot \ln(p_i/p_{ref}) = a + \frac{b}{T} + \Delta_{l,cr}^g C_{p,m}^o \cdot \ln\left(\frac{T}{T_0}\right) \quad (\text{S2}),$$

where  $R = 8.314462$  J·K<sup>-1</sup>·mol<sup>-1</sup> is the molar gas constant, the reference pressure  $p_{ref} = 1$  Pa,  $a$  and  $b$  are adjustable parameters, the arbitrary temperature  $T_0$  applied in Eq. (S2) was chosen to be  $T_0 = 298.15$  K and  $\Delta_l^g C_{p,m}^o = C_{p,m}^o(\text{g}) - C_{p,m}^o(\text{liq})$  is the difference between the molar heat capacities of the gaseous  $C_{p,m}^o(\text{g})$  and the liquid phase  $C_{p,m}^o(\text{liq})$ , respectively. For the solid compounds  $\Delta_{cr}^g C_{p,m}^o = C_{p,m}^o(\text{g}) - C_{p,m}^o(\text{cr})$  were used. The  $\Delta_l^g C_{p,m}^o$ - and  $\Delta_{cr}^g C_{p,m}^o$ -values used in Eq. (S2) are given in Table S7.

**Table S7**

Compilation of the standard molar heat capacities,  $C_{p,m}^o$ , and the heat capacity differences,  $\Delta_l^g C_{p,m}^o$ , evaluated in our previous work <sup>4</sup> for  $\alpha,\omega$ -alkanediols in our previous work (in J·K<sup>-1</sup>·mol<sup>-1</sup> at  $T = 298.15$  K)

| Diol               | $C_{p,m}^o(\text{g})$ <sup>a</sup> | $C_{p,m}^o(\text{liq})$ <sup>b</sup> | $C_{p,m}^o(\text{cr})$ <sup>b</sup> | $\Delta_l^g C_{p,m}^o$ <sup>c</sup> | $\Delta_{cr}^g C_{p,m}^o$ <sup>c</sup> | $\Delta_{cr}^g C_{p,m}^o$ <sup>c</sup> |
|--------------------|------------------------------------|--------------------------------------|-------------------------------------|-------------------------------------|----------------------------------------|----------------------------------------|
| 1                  | 2                                  | 3                                    | 4                                   | 5                                   | 6                                      | 7                                      |
| 1,2-ethanediol     | 78.0                               | 149.7                                |                                     | <b>-62.5</b>                        |                                        |                                        |
| 1,3-propanediol    | 96.5                               | 175.8                                |                                     | <b>-72.6</b>                        |                                        |                                        |
| 1,4-butanediol     | 115.1                              | 203.3                                |                                     | <b>-83.3</b>                        |                                        |                                        |
| 1,5-pentanediol    | 137.1                              | 232.5                                |                                     | <b>-94.6</b>                        |                                        |                                        |
| 1,6-hexanediol     | 157.7                              | 265.1                                | 190.7                               | <b>-105.5</b>                       | <b>-77.5</b>                           | <b>-30.1</b>                           |
| 1,7-heptanediol    | 177.4                              | 296.0                                | 211.7                               | <b>-119.5</b>                       | <b>-84.3</b>                           | <b>-33.6</b>                           |
| 1,8-octanediol     | 197.5                              | 326.8                                | 236.5                               | <b>-131.6</b>                       | <b>-91.0</b>                           | <b>-37.7</b>                           |
| 1,9-nonanediol     | 217.7                              | 357.7                                | 258.7                               | <b>-144.0</b>                       | <b>-97.8</b>                           | <b>-41.5</b>                           |
| 1,10-decanediol    | 238.0                              | 388.5 <sup>d</sup>                   | 279.6                               | <b>-155.2</b>                       | <b>-104.5</b>                          | <b>-44.9</b>                           |
| 1,11-undecanediol  | 257.9                              | 419.4 <sup>d</sup>                   | 298.4                               |                                     | <b>-111.3</b>                          | <b>-48.1</b>                           |
| 1,12-dodecanediol  | 278.1                              | 450.2 <sup>d</sup>                   | 330.7                               |                                     | <b>-118.0</b>                          | <b>-53.5</b>                           |
| 1,13-tridecanediol | 298.2                              | 481.1 <sup>d</sup>                   | 365.8                               |                                     | <b>-124.8</b>                          | <b>-59.3</b>                           |

|                      |       |                    |       |               |              |
|----------------------|-------|--------------------|-------|---------------|--------------|
| 1,14-tetradecanediol | 318.4 | 511.9 <sup>d</sup> | 380.4 | <b>-131.5</b> | <b>-61.8</b> |
| 1,15-pentadecanediol | 338.5 | 542.8 <sup>d</sup> | 404.5 | <b>-138.3</b> | <b>-65.8</b> |
| 1,16-hexadecanediol  | 358.6 | 573.6 <sup>d</sup> | 426.4 | <b>-145.0</b> | <b>-69.4</b> |

<sup>a</sup> DFT and empirical calculated results.

<sup>b</sup> Experimental and empirical data.

<sup>c</sup> The data in bold recommended in Ref. <sup>4</sup> for thermochemical calculations.

<sup>d</sup> From Ref. <sup>4</sup>.

### ***Adjustment of phase-change enthalpies to the reference temperature $T = 298.18$ K***

The standard molar enthalpies of vaporization/sublimation at temperatures  $T$  were derived from the temperature dependence of the vapor pressures, approximated by Eq. (S2) using the following equation:

$$\Delta_{l,cr}^g H_m^o(T) = -b + \Delta_{l,cr}^g C_{p,m}^o \times T \quad (\text{S3})$$

where  $b$  is one of the adjustable parameters of Eq. (S2).

Empirical correlations developed for alkanediols in our recent work <sup>4</sup>:

$$C_{p,m}^o(\text{g}) / \text{J}\cdot\text{K}^{-1}\cdot\text{mol}^{-1} = 20.14 \times N_C + 36.4 \quad \text{with } R^2 = 0.9997 \text{ for C2 to C10} \quad (\text{S4})$$

$$C_{p,m}^o(\text{liq}) / \text{J}\cdot\text{K}^{-1}\cdot\text{mol}^{-1} = 30.85 \times N_C + 80.0 \quad \text{with } R^2 = 0.9985 \quad (\text{S5}),$$

$$C_{p,m}^o(\text{cr}) / \text{J}\cdot\text{K}^{-1}\cdot\text{mol}^{-1} = 24.1 \times N_C + 43.0 \quad \text{with } R^2 = 0.9952 \text{ for C6 to C16} \quad (\text{S6})$$

$$\Delta_l^g C_{p,m}^o / \text{J}\cdot\text{K}^{-1}\cdot\text{mol}^{-1} = -0.3885 \times C_{p,m}^o(\text{liq}) - 4.3 \quad \text{with } R^2 = 0.9996 \quad (\text{S7})$$

$$\Delta_{cr}^g C_{p,m}^o / \text{J}\cdot\text{K}^{-1}\cdot\text{mol}^{-1} = -0.1668 \times C_{p,m}^o(\text{cr}) + 1.7 \quad \text{with } R^2 = 0.9216, \quad (\text{S8}),$$

$$\Delta_{cr}^l C_{p,m}^o / \text{J}\cdot\text{K}^{-1}\cdot\text{mol}^{-1} = -0.2188 \times C_{p,m}^o(\text{liq}) - 19.5 \quad \text{with } R^2 = 0.9999 \quad (\text{S9})$$

The standard molar vaporization entropies at temperatures  $T$  were also derived from the temperature dependences of the vapor pressures (approximated by Eq. S2) as follows:

$$\Delta_{l,cr}^g S_m^o(T) = \Delta_{l,cr}^g H_m^o / T + R \times \ln(p_i / p^o) \quad (\text{S10})$$

with  $p^o = 0.1$  MPa.

### ***The BP method***

The very limited data on vapor pressures that are generally available for the long-chained  $\alpha,\omega$ -alkanediols has prompted us to involve experimental boiling temperatures at different pressures compiled by databases <sup>5-7</sup>. The accuracy of this data is questionable as it comes from the distillation of a compound after its synthesis and not from special physico-chemical studies. However, the numerous data on boiling temperatures at standard pressure as well as at reduced pressures provide at least a reliable level of the experimental vapor pressures and trend of the dependence of the vapor pressure with temperature <sup>8</sup>. This type of data is especially important and helps to reconcile the results in a case where the conventional methods show significant disagreement. In this work we treated the available vapor pressure for 1,5-pentanediol data found in <sup>5-7</sup> and calculated the vaporization enthalpies using Eqs. S2, S3 and S10 with the  $\Delta_l^g C_{p,m}^o(298.15 \text{ K})$ -values recommended in Table S7, column 5.

**Table S8**

The vapor pressures  $p$ , and standard vaporization enthalpies and entropies obtained by the approximation of boiling points at different pressures available in the literature<sup>5-7</sup>

| $T/$<br>K <sup>a</sup>                                                                                                 | $p/$<br>Pa | $\Delta_l^g H_m^o/a$<br>kJ·mol <sup>-1</sup> | $\Delta_l^g S_m^o/$<br>J·K <sup>-1</sup> ·mol <sup>-1</sup> |
|------------------------------------------------------------------------------------------------------------------------|------------|----------------------------------------------|-------------------------------------------------------------|
| 1,5-pentanediol (liq)                                                                                                  |            |                                              |                                                             |
| $\Delta_l^g H_m^o(298.15 \text{ K}) = (85.5 \pm 2.8) \text{ kJ} \cdot \text{mol}^{-1}$                                 |            |                                              |                                                             |
| $\Delta_l^g S_m^o(298.15 \text{ K}) = (179.0 \pm 5.2) \text{ J} \cdot \text{K}^{-1} \cdot \text{mol}^{-1}$             |            |                                              |                                                             |
| $\Delta_l^g G_m^o(298.15 \text{ K}) = (32.2 \pm 0.2) \text{ kJ} \cdot \text{mol}^{-1}$                                 |            |                                              |                                                             |
| $\ln(p/p_{ref}) = \frac{369.3}{R} - \frac{113745.8}{RT} - \frac{94.6}{R} \ln \frac{T}{298.15}; p_{ref} = 1 \text{ Pa}$ |            |                                              |                                                             |
| 352                                                                                                                    | 33         | 80.5                                         | 162.4                                                       |
| 357                                                                                                                    | 53         | 80.0                                         | 161.4                                                       |
| 360                                                                                                                    | 67         | 79.7                                         | 160.6                                                       |
| 366                                                                                                                    | 107        | 79.1                                         | 159.3                                                       |
| 376                                                                                                                    | 200        | 78.2                                         | 156.2                                                       |
| 378                                                                                                                    | 267        | 78.0                                         | 157.0                                                       |
| 378                                                                                                                    | 200        | 78.0                                         | 154.6                                                       |
| 391                                                                                                                    | 533        | 76.8                                         | 152.8                                                       |
| 393                                                                                                                    | 667        | 76.6                                         | 153.2                                                       |
| 401                                                                                                                    | 1067       | 75.8                                         | 151.3                                                       |
| 402                                                                                                                    | 1067       | 75.7                                         | 150.6                                                       |
| 406                                                                                                                    | 1533       | 75.3                                         | 150.8                                                       |
| 407                                                                                                                    | 1600       | 75.2                                         | 150.5                                                       |
| 407                                                                                                                    | 1733       | 75.2                                         | 151.2                                                       |
| 407                                                                                                                    | 1600       | 75.2                                         | 150.5                                                       |
| 407                                                                                                                    | 1533       | 75.2                                         | 150.1                                                       |
| 408                                                                                                                    | 1867       | 75.1                                         | 151.1                                                       |
| 410                                                                                                                    | 1600       | 75.0                                         | 148.4                                                       |
| 410                                                                                                                    | 2000       | 75.0                                         | 150.3                                                       |
| 411                                                                                                                    | 1600       | 74.9                                         | 147.8                                                       |
| 412                                                                                                                    | 2000       | 74.8                                         | 149.0                                                       |
| 415                                                                                                                    | 2400       | 74.5                                         | 148.5                                                       |
| 417                                                                                                                    | 2666       | 74.3                                         | 148.0                                                       |
| 426                                                                                                                    | 3866       | 73.4                                         | 145.4                                                       |
| 428                                                                                                                    | 3866       | 73.3                                         | 144.1                                                       |
| 428                                                                                                                    | 4133       | 73.3                                         | 144.7                                                       |
| 435                                                                                                                    | 5333       | 72.6                                         | 142.5                                                       |
| 513                                                                                                                    | 101325     | 65.2                                         | 127.2                                                       |

|     |        |      |       |
|-----|--------|------|-------|
| 515 | 101325 | 65.0 | 126.4 |
| 516 | 101325 | 65.0 | 126.2 |

<sup>a</sup>Uncertainties in this table are expressed as the expanded uncertainty (0.95 level of confidence,  $k = 2$ ). Uncertainties of the vaporization enthalpies include uncertainties from the fitting equation S2 and uncertainties from temperature adjustment to  $T = 298.15$  K. Uncertainties in the temperature adjustment of vaporization enthalpies to the reference temperature  $T = 298.15$  K are estimated to account with 20 % to the total adjustment.

**Table S9**

Chain-length dependence of the vaporization enthalpies  $\Delta_1^g H_m^o(298.15 \text{ K})$  of  $\alpha,\omega$ -alkanediols<sup>a</sup>

| Compound        | $N_C$ <sup>b</sup> | $\Delta_1^g H_m^o(298.15 \text{ K})_{\text{exp}}$ <sup>c</sup><br>kJ·mol <sup>-1</sup> | $\Delta_1^g H_m^o(298.15 \text{ K})_{\text{calc}}$ <sup>d</sup><br>kJ·mol <sup>-1</sup> | $\Delta^e$<br>kJ·mol <sup>-1</sup> |
|-----------------|--------------------|----------------------------------------------------------------------------------------|-----------------------------------------------------------------------------------------|------------------------------------|
| 1,2-ethanediol  | 2                  | 65.7±0.2                                                                               | (74.6)                                                                                  | -8.9                               |
| 1,3-propanediol | 3                  | 71.5±0.3                                                                               | (78.6)                                                                                  | -7.1                               |
| 1,4-butanediol  | 4                  | 79.0±0.7                                                                               | (82.6)                                                                                  | -3.6                               |
| 1,5-pentanediol | 5                  | 86.6±0.6                                                                               | 86.7                                                                                    | -0.1                               |
| 1,6-hexanediol  | 6                  | 90.7±0.4                                                                               | 90.7                                                                                    | 0.0                                |
| 1,7-heptanediol | 7                  | 94.8±0.4                                                                               | 94.7                                                                                    | 0.1                                |
| 1,8-octanediol  | 8                  | 98.7±0.3                                                                               | 98.7                                                                                    | 0.0                                |
| 1,9-nonanediol  | 9                  | 102.7±0.3                                                                              | 102.7                                                                                   | 0.0                                |
| 1,10-decanediol | 10                 | 106.7±0.3                                                                              | 106.7                                                                                   | 0.0                                |
| 1,11-           | 11                 |                                                                                        | 110.7                                                                                   |                                    |
| 1,12-           | 12                 |                                                                                        | 114.7                                                                                   |                                    |
| 1,13-           | 13                 |                                                                                        | 118.7                                                                                   |                                    |
| 1,14-           | 14                 |                                                                                        | 122.7                                                                                   |                                    |
| 1,15-           | 15                 |                                                                                        | 126.8                                                                                   |                                    |
| 1,16-           | 16                 |                                                                                        | 130.8                                                                                   |                                    |

<sup>a</sup>The uncertainties in this table are given as two times the standard deviation.

<sup>b</sup>Number of the carbon atoms in alkyl chain.

<sup>c</sup>Experimental values from Table 3.

<sup>d</sup>Calculated using the following equation:

$$\Delta_1^g H_m^o(298.15 \text{ K})_{\text{calc}} / \text{kJ}\cdot\text{mol}^{-1} = 4.01 \times N_C + 66.6 \text{ with } R^2 = 0.9999, \text{ (for } C \geq 5),$$

which was developed from the correlation of the data given in columns 2 and 3 of this table, with the assessed expanded uncertainty of  $\pm 0.5$  kJ·mol<sup>-1</sup> (0.95 level of confidence,  $k = 2$ ). Data in parentheses were not involved in the correlation.

<sup>e</sup>Difference between experimental and calculated values.

**Table S10**

Correlation of vaporization enthalpies  $\Delta_1^g H_m^o(298.15 \text{ K})$  of  $\alpha,\omega$ -alkanediols with the their  $T_b$  (normal boiling temperatures)<sup>a</sup>

| Compound        | $T_b$ <sup>b</sup><br>K | $\Delta_1^g H_m^o(298.15 \text{ K})_{\text{exp}}$ <sup>c</sup><br>kJ·mol <sup>-1</sup> | $\Delta_1^g H_m^o(298.15 \text{ K})_{\text{calc}}$ <sup>d</sup><br>kJ·mol <sup>-1</sup> | $\Delta^e$<br>kJ·mol <sup>-1</sup> |
|-----------------|-------------------------|----------------------------------------------------------------------------------------|-----------------------------------------------------------------------------------------|------------------------------------|
| 1,2-ethanediol  | 472.0                   | 65.7±0.2                                                                               | (74.5)                                                                                  | -8.8                               |
| 1,3-propanediol | 485.9                   | 71.5±0.3                                                                               | (78.9)                                                                                  | -7.4                               |
| 1,4-butanediol  | 499.7                   | 79.0±0.7                                                                               | (83.1)                                                                                  | -4.1                               |
| 1,5-pentanediol | 511.6                   | 86.6±0.6                                                                               | 86.9                                                                                    | -0.3                               |
| 1,6-hexanediol  | 523.7                   | 90.7±0.4                                                                               | 90.7                                                                                    | 0.0                                |
| 1,7-heptanediol | 535.2                   | 94.8±0.4                                                                               | 94.2                                                                                    | 0.6                                |

|                 |       |           |       |      |
|-----------------|-------|-----------|-------|------|
| 1,8-octanediol  | 549.5 | 98.7±0.3  | 98.7  | 0.0  |
| 1,9-nonanediol  | 562.3 | 102.7±0.3 | 102.7 | 0.0  |
| 1,10-decanediol | 575.6 | 106.7±0.3 | 106.8 | -0.1 |
| 1,11-           | 588.6 |           | 110.9 |      |
| 1,12-           | 602.0 |           | 115.0 |      |
| 1,13-           | 614.5 |           | 118.9 |      |
| 1,14-           | 627.3 |           | 122.9 |      |
| 1,15-           | 640.1 |           | 126.9 |      |
| 1,16-           | 653.6 |           | 131.1 |      |

<sup>a</sup> The uncertainties in this table are given as two times the standard deviation.

<sup>b</sup> Normal boiling temperatures are from Ref. <sup>5-7</sup>.

<sup>c</sup> Experimental values given in Table 3.

<sup>d</sup> Calculated using the following equation:

$$\Delta_1^g H_m^{\circ}(298.15 \text{ K})_{\text{calc}} / \text{kJ}\cdot\text{mol}^{-1} = 0.3177 \times T_b - 72.6 \text{ with } R^2 = 0.9885, \text{ (for } C \geq 5),$$

which was developed from the correlation of the data given in columns 2 and 3 of this table, with the assessed expanded uncertainty of ±0.5 kJ·mol<sup>-1</sup> (0.95 level of confidence, k = 2). Data in parentheses were not involved in the correlation.

<sup>e</sup> Difference between experimental and calculated values.

**Table S11**

Correlation of vaporization enthalpies,  $\Delta_1^g H_m^{\circ}(298.15 \text{ K})$ , of  $\alpha,\omega$ -alkanediols with their Kovats indices ( $J_x$ )<sup>a</sup>

| Diol            | $J_x$ <sup>b</sup> | $\Delta_1^g H_m^{\circ}(298 \text{ K})_{\text{exp}}$ <sup>c</sup><br>kJ·mol <sup>-1</sup> | $\Delta_1^g H_m^{\circ}(298 \text{ K})_{\text{calc}}$ <sup>d</sup><br>kJ·mol <sup>-1</sup> | $\Delta$ <sup>e</sup><br>kJ·mol <sup>-1</sup> |
|-----------------|--------------------|-------------------------------------------------------------------------------------------|--------------------------------------------------------------------------------------------|-----------------------------------------------|
| 1,2-ethanediol  | 705                | 65.7±0.2                                                                                  | (74.6)                                                                                     | -8.9                                          |
| 1,3-propanediol | 814                | 71.5±0.3                                                                                  | (78.9)                                                                                     | -7.4                                          |
| 1,4-butanediol  | 922                | 79.0±0.7                                                                                  | (83.2)                                                                                     | -4.2                                          |
| 1,5-pentanediol | 1016               | 86.6±0.6                                                                                  | 86.9                                                                                       | -0.3                                          |
| 1,6-hexanediol  | 1111               | 90.7±0.4                                                                                  | 90.7                                                                                       | 0.0                                           |
| 1,7-heptanediol | 1201               | 94.8±0.4                                                                                  | 94.3                                                                                       | 0.5                                           |
| 1,8-octanediol  | 1313               | 98.7±0.3                                                                                  | 98.7                                                                                       | 0.0                                           |
| 1,9-nonanediol  | 1414               | 102.7±0.3                                                                                 | 102.7                                                                                      | 0.0                                           |
| 1,10-decanediol | 1518               | 106.7±0.3                                                                                 | 106.9                                                                                      | -0.2                                          |
| 1,11-           | 1620               |                                                                                           | 110.9                                                                                      |                                               |
| 1,12-           | 1725               |                                                                                           | 115.1                                                                                      |                                               |
| 1,13-           | 1823               |                                                                                           | 119.0                                                                                      |                                               |
| 1,14-           | 1924               |                                                                                           | 123.0                                                                                      |                                               |
| 1,15-           | 2024               |                                                                                           | 127.0                                                                                      |                                               |
| 1,16-           | 2130               |                                                                                           | 131.2                                                                                      |                                               |

<sup>a</sup> The uncertainties in this table are given as two times the standard deviation.

<sup>b</sup> Kovats indices,  $J_x$ , on the standard non-polar column DB-1<sup>9</sup>.

<sup>c</sup> Experimental values from Table 3.

<sup>d</sup> Calculated using the following equation:

$$\Delta_1^g H_m^{\circ}(298.15 \text{ K})_{\text{calc}} / \text{kJ}\cdot\text{mol}^{-1} = 0.0397 \times J_x + 46.6 \text{ with } R^2 = 0.9807, \text{ (for } C \geq 5),$$

which was developed from the correlation of the data given in columns 2 and 3 of this table, with the assessed expanded uncertainty of ±0.5 kJ·mol<sup>-1</sup> (0.95 level of confidence, k = 2). Data in parentheses were not involved in the correlation.

<sup>e</sup> Difference between experimental and calculated values.

**Table S12**

Experimental enthalpies of fusion ( $\Delta_{\text{cr}}^1 H_{\text{m}}^{\circ}$ ) at melting points ( $T_{\text{fus}}$ ) of  $\alpha,\omega$ -alkanediols available from the literature<sup>a</sup>

|          | $T_{\text{fus}}$ | $\Delta_{\text{cr}}^1 H_{\text{m}}^{\circ}(T_{\text{fus}})$ | Ref                  |
|----------|------------------|-------------------------------------------------------------|----------------------|
| Compound | K                | $\text{kJ}\cdot\text{mol}^{-1}$                             |                      |
| 1,2-     | 260.6            | 10.0±0.5                                                    | 10                   |
|          | 260.8            | 11.6±1.0                                                    | 11                   |
|          | 256.6            | 9.5±0.4                                                     | 12                   |
|          | <b>259.3</b>     | <b>9.9±0.3</b>                                              | average <sup>b</sup> |
| 1,3-     | 245.5            | 7.1±0.6                                                     | 12                   |
|          | (249.0)          | (11.4±1.0)                                                  | 13                   |
|          |                  |                                                             |                      |
| 1,4-     | 293.6            | 18.7±0.5                                                    | 14                   |
|          | 289.9            | 12.0±0.6                                                    | 12                   |
|          | 294.2            | 16.0±0.8                                                    | 15                   |
|          | <b>292.6</b>     | <b>(15.9±0.4)</b>                                           | average <sup>b</sup> |
| 1,5-     | (248.0)          | (15.7±1.0)                                                  | 16                   |
|          | <b>254.4</b>     | <b>9.7±0.4</b>                                              | 12                   |
| 1,6      | 320.6            | 25.5±0.8                                                    | 17                   |
|          | 314.6            | 22.2±1.2                                                    | 12                   |
|          | 315.0            | 22.6±0.1                                                    | 18                   |
|          | 316.0            | 25.5±0.5                                                    | 19                   |
|          | 314.7            | 26.4±0.4                                                    | 20                   |
|          | 317.0            | 22.9±0.8                                                    | 15                   |
|          | <b>316.3</b>     | <b>22.9±0.2</b>                                             | average <sup>b</sup> |
| 1,7      | (295.0)          | (21.3±0.6)                                                  | 12                   |
|          | <b>290.5</b>     | <b>26.3±0.6</b>                                             | 20                   |
| 1,8-     | 332.7            | 36.1±0.4                                                    | 12                   |
|          | 331.6            | 36.3±0.3                                                    | 20                   |
|          | <b>332.2</b>     | <b>36.2±0.2</b>                                             | average <sup>b</sup> |
| 1,9      | 319.5            | 36.4±0.4                                                    | 12                   |
|          | 318.7            | 36.7±0.7                                                    | 20                   |
|          | <b>319.1</b>     | <b>36.5±0.4</b>                                             | average <sup>b</sup> |

|                   |              |                 |                      |
|-------------------|--------------|-----------------|----------------------|
| 1,10              | (345.4)      | (41.7±0.6)      | 12                   |
|                   | 345.7        | 45.8±0.4        | 21                   |
|                   | 345.6        | 44.2±0.5        | 22                   |
|                   | 345.8        | 45.0±0.2        | 20                   |
|                   | (347.8)      | (37.8±0.8)      | 15                   |
|                   | <b>345.7</b> | <b>45.1±0.2</b> | average <sup>b</sup> |
| 1,11              | 334.1        | 45.9±0.5        | 20                   |
| 1,12              | 352.0        | 51.2±1.3        | 23                   |
|                   | 352.9        | 54.2±0.7        | 20                   |
|                   | <b>352.5</b> | <b>53.5±0.6</b> | average <sup>b</sup> |
| 1,13 <sup>c</sup> | 351.0        | 46.7±2.0        | 24                   |
|                   | 350.3        | 54.8±0.8        | 20                   |
|                   | <b>350.7</b> | <b>53.7±0.7</b> | average <sup>b</sup> |
| 1,14              | 360.4        | 61.9±3.7        | 24                   |
|                   | 359.2        | 63.5±0.3        | 20                   |
|                   | 359.8        | <b>63.4±0.4</b> | average <sup>b</sup> |
| 1,15 <sup>d</sup> | 361.4        | 58.7±0.5        | 24                   |
|                   | 361.2        | (65.3±1.6)      | 20                   |
|                   | 364.0        | 57.4±0.3        | 15                   |
|                   | <b>362.7</b> | <b>58.0±0.5</b> | average <sup>b</sup> |
| 1,16 <sup>e</sup> | 365.4        | 64.2±1.0        | 24                   |
|                   | 366.0        | 72.8±0.5        | 20                   |
|                   | 366.5        | 63.3±1.0        | 15                   |
|                   | <b>366.0</b> | <b>69.8±0.4</b> | average <sup>b</sup> |

<sup>a</sup>Uncertainties are presented as expanded uncertainties (0.95 level of confidence with k=2).

<sup>b</sup>Weighted average value (experimental uncertainty was taken as the weighing factor).

<sup>c</sup>From <sup>24</sup> a solid–solid phase transition at  $T_{\text{trs}} = 343.0$  K with  $\Delta_{\text{trs}}H_m = 28.9$  kJ·mol<sup>-1</sup> was observed. The value of  $\Delta_{\text{cr}}^1H_m^{\text{o}}(T_{\text{fus}})$  includes  $\Delta_{\text{trs}}H_m$ . Also Badea *et. al.* <sup>20</sup> observed the solid–solid phase transition at  $T_{\text{trs}} = (339.3 \pm 0.5)$  K. However, since the  $T_{\text{trs}}$  was too close to  $T_{\text{fus}}$ , a precise determination of  $\Delta_{\text{trs}}H_m$ , therefore the value of  $\Delta_{\text{cr}}^1H_m^{\text{o}}(T_{\text{fus}})$  includes  $\Delta_{\text{trs}}H_m$ .

<sup>d</sup>From <sup>20</sup> a solid–solid phase transition at  $T_{\text{trs}} = (349.0 \pm 0.6)$  K with  $\Delta_{\text{trs}}H_m = (38.3 \pm 1.2)$  kJ·mol<sup>-1</sup> was observed. The value of  $\Delta_{\text{cr}}^1H_m^{\text{o}}(T_{\text{fus}})$  includes  $\Delta_{\text{trs}}H_m$ . From <sup>15</sup>  $T_{\text{trs}} = 348.7$  K with  $\Delta_{\text{trs}}H_m = 33.2$  kJ·mol<sup>-1</sup> and  $T_{\text{fus}} = 364.0$  K with  $\Delta_{\text{cr}}^1H_m^{\text{o}}(T_{\text{fus}}) = 24.2$  kJ·mol<sup>-1</sup>. From <sup>24</sup>  $T_{\text{trs}} = 349.4$  K with  $\Delta_{\text{trs}}H_m = 35.1$  kJ·mol<sup>-1</sup> and  $T_{\text{fus}} = 361.4$  K with  $\Delta_{\text{cr}}^1H_m^{\text{o}}(T_{\text{fus}}) = 23.6$  kJ·mol<sup>-1</sup>, therefore the value of  $\Delta_{\text{cr}}^1H_m^{\text{o}}(T_{\text{fus}})$  in this table includes  $\Delta_{\text{trs}}H_m$ .

<sup>e</sup>The solid–solid phase transition at  $T_{\text{trs}} = (364.1 \pm 0.2)$  K <sup>20</sup> or at  $T_{\text{trs}} = 363.0$  K <sup>24</sup> was observed, but the transition temperature in both cases was too close to melting point for  $\Delta_{\text{trs}}H_m$  to be determined, therefore the value of  $\Delta_{\text{cr}}^1H_m^{\text{o}}(T_{\text{fus}})$  in this table includes  $\Delta_{\text{trs}}H_m$ . However, from <sup>15</sup>  $T_{\text{trs}} = 366.5$  K with  $\Delta_{\text{trs}}H_m = 36.2$  kJ·mol<sup>-1</sup> and  $T_{\text{fus}} = 367.1$  K with  $\Delta_{\text{cr}}^1H_m^{\text{o}}(T_{\text{fus}}) = 27.1$  kJ·mol<sup>-1</sup>. The value of  $\Delta_{\text{cr}}^1H_m^{\text{o}}(T_{\text{fus}})$  from <sup>15</sup> given in this table includes  $\Delta_{\text{trs}}H_m$ .

**Table S13**

Correlation of enthalpies of fusion,  $\Delta_{\text{cr}}^1H_m^{\text{o}}(T_{\text{fus}})$ , with their fusion temperatures,  $T_{\text{fus}}$ , for the *odd* members of the  $\alpha,\omega$ -alkanediol family

| Diol  | $T_{\text{fus}}^{\text{a}}$ | $\Delta_{\text{cr}}^{\text{l}}H_{\text{m}}^{\text{o}}(T_{\text{fus}})^{\text{a}}$ | $\Delta_{\text{cr}}^{\text{l}}H_{\text{m}}^{\text{o}}(T_{\text{fus}})^{\text{b}}$ | $\Delta^{\text{c}}$             |
|-------|-----------------------------|-----------------------------------------------------------------------------------|-----------------------------------------------------------------------------------|---------------------------------|
|       | K                           | $\text{kJ}\cdot\text{mol}^{-1}$                                                   | $\text{kJ}\cdot\text{mol}^{-1}$                                                   | $\text{kJ}\cdot\text{mol}^{-1}$ |
| 1,3-  | 245.5                       | 7.1                                                                               | 6.2                                                                               | 0.9                             |
| 1,5-  | 254.4                       | 9.7                                                                               | 10.1                                                                              | -0.4                            |
| 1,7-  | 290.5                       | 26.3                                                                              | 26.1                                                                              | 0.2                             |
| 1,9-  | 319.1                       | 36.5                                                                              | 38.7                                                                              | -2.2                            |
| 1,11- | 334.1                       | 45.9                                                                              | 45.3                                                                              | 0.6                             |
| 1,13- | 350.7                       | 53.7                                                                              | 52.7                                                                              | 1.0                             |
| 1,15- | 362.7                       | 58.0                                                                              | 58.0                                                                              | 0.0                             |

<sup>a</sup> Evaluated experimental data from Table S12.

<sup>b</sup> Calculated according to the approximation of the data given in this table:

$$\Delta_{\text{cr}}^{\text{l}}H_{\text{m}}^{\text{o}}(298.15 \text{ K})/(\text{kJ}\cdot\text{mol}^{-1}) = 0.4416 \times J_x - 102.2 \quad \text{with } R^2 = 0.9967.$$

<sup>c</sup> Difference between column 2 and 3 in this table.

**Table S14**

Correlation of enthalpies of fusion,  $\Delta_{\text{cr}}^{\text{l}}H_{\text{m}}^{\text{o}}(T_{\text{fus}})$ , with their fusion temperatures,  $T_{\text{fus}}$ , for the *even* members of the  $\alpha,\omega$ -alkanediols family

|       | $T_{\text{fus}}$ | $\Delta_{\text{cr}}^{\text{l}}H_{\text{m}}^{\text{o}}(T_{\text{fus}})^{\text{b}}$ | $\Delta_{\text{cr}}^{\text{l}}H_{\text{m}}^{\text{o}}(T_{\text{fus}})^{\text{b}}$ | $\Delta^{\text{b}}$             |
|-------|------------------|-----------------------------------------------------------------------------------|-----------------------------------------------------------------------------------|---------------------------------|
|       | K                | $\text{kJ}\cdot\text{mol}^{-1}$                                                   | $\text{kJ}\cdot\text{mol}^{-1}$                                                   | $\text{kJ}\cdot\text{mol}^{-1}$ |
| 1,6-  | 316.3            | 22.9                                                                              | 21.2                                                                              | 1.7                             |
| 1,8-  | 332.2            | 36.2                                                                              | 36.1                                                                              | 0.1                             |
| 1,10- | 345.7            | 45.1                                                                              | 48.7                                                                              | -3.6                            |
| 1,12- | 352.5            | 53.5                                                                              | 55.1                                                                              | -1.6                            |
| 1,14- | 359.8            | 63.4                                                                              | 62.0                                                                              | 1.4                             |
| 1,16- | 366.0            | 69.8                                                                              | 67.8                                                                              | 2.0                             |

<sup>a</sup> Evaluated experimental data from Table S12.

<sup>b</sup> Calculated according to the approximation of the data given in this table:

$$\Delta_{\text{cr}}^{\text{l}}H_{\text{m}}^{\text{o}}(298.15 \text{ K})/(\text{kJ}\cdot\text{mol}^{-1}) = 0.9365 \times J_x - 275.0 \quad \text{with } R^2 = 0.9835.$$

<sup>c</sup> Difference between column 2 and 3 in this table.

**Table S15**

Calculation of sublimation enthalpies  $\Delta_{\text{cr}}^{\text{g}}H_{\text{m}}^{\text{o}}(298.15 \text{ K})$  from enthalpies of vaporization,  $\Delta_{\text{l}}^{\text{g}}H_{\text{m}}^{\text{o}}(298.15 \text{ K})$ , and enthalpies of fusion,  $\Delta_{\text{cr}}^{\text{l}}H_{\text{m}}^{\text{o}}(298.15 \text{ K})$ , in  $\text{kJ}\cdot\text{mol}^{-1}$

| Diol  | $\Delta_{\text{l}}^{\text{g}}H_{\text{m}}^{\text{o}}(298.15 \text{ K})^{\text{a}}$ | $\Delta_{\text{cr}}^{\text{l}}H_{\text{m}}^{\text{o}}(298.15 \text{ K})^{\text{b}}$ | $\Delta_{\text{cr}}^{\text{g}}H_{\text{m}}^{\text{o}}(298.15 \text{ K})^{\text{c}}$ |
|-------|------------------------------------------------------------------------------------|-------------------------------------------------------------------------------------|-------------------------------------------------------------------------------------|
| 1,6-  | 90.7±0.4                                                                           | 21.5±0.5                                                                            | 112.2±0.7                                                                           |
| 1,8-  | 98.7±0.3                                                                           | 33.1±1.0                                                                            | 131.8±1.1                                                                           |
| 1,9-  | 102.7±0.3                                                                          | 34.5±0.7                                                                            | 137.2±0.8                                                                           |
| 1,10- | 106.7±0.3                                                                          | 40.1±1.5                                                                            | 146.8±1.5                                                                           |

<sup>a</sup> From Table 3.

<sup>b</sup> From Table 6.

<sup>c</sup> Sum of column 2 and 3 in this table.

**Table S16**

Correlation of experimental enthalpies of sublimation,  $\Delta_{cr}^g H_m^o(298.15 \text{ K})$ , and enthalpies of fusion,  $\Delta_{cr}^l H_m^o(T_{fus})$ , in  $\text{kJ}\cdot\text{mol}^{-1}$

|    | $\Delta_{cr}^l H_m^o(T_{fus})^a$ | $\Delta_{cr}^g H_m^o(298.15 \text{ K})_{exp}^b$ | $\Delta_{cr}^g H_m^o(298.15 \text{ K})_{calc}^c$ | $\Delta^d$ |
|----|----------------------------------|-------------------------------------------------|--------------------------------------------------|------------|
| 6  | 22.9                             | 112.1                                           | 113.1                                            | -1.0       |
| 7  | 26.3                             | 121.3                                           | 118.8                                            | 2.5        |
| 8  | 36.2                             | 132.1                                           | 135.4                                            | -3.3       |
| 9  | 36.5                             | 137.3                                           | 135.9                                            | 1.4        |
| 10 | 45.1                             | 147.0                                           | 150.2                                            | -3.2       |
| 11 | 45.9                             | 152.8                                           | 151.6                                            | 1.2        |
| 12 | 53.5                             | 162.2                                           | 164.2                                            | -2.0       |
| 13 | 53.7                             | 166.1                                           | 164.6                                            | 1.5        |
| 14 | 63.4                             | 178.3                                           | 180.8                                            | -2.5       |
| 15 | 58.0                             | 176.1                                           | 171.8                                            | 4.3        |
| 16 | 69.8                             | 191.2                                           | 191.5                                            | -0.3       |

<sup>a</sup> Experimental values from Table S12.

<sup>b</sup> Experimental values from Table 5.

<sup>c</sup> Calculated according to equation:

$$\Delta_{cr}^g H_m^o(298.15 \text{ K})_{exp} / \text{kJ}\cdot\text{mol}^{-1} = 1.67 \times \Delta_{cr}^l H_m^o(T_{fus}) + 74.9 \quad \text{with } R^2 = 0.9899,$$

developed from the data given in this table.

### *Combustion calorimetry: enthalpy of formation determination*

The standard molar energy of combustion was measured with a self-made high-precision isoperibolic calorimeter with a static bomb and a stirred water bath. About 0.3-0.5 g of the solid sample was encapsulated in a polyethylene bulb (Fa. NeoLab, Heidelberg, Germany) and weighed with a microbalance with a resolution of  $10^{-6}$  g. The bulb was compressed with special tweezers and sealed by heating the neck near a glowing wire. The bulb with the sample was placed in the crucible and burnt in oxygen at a pressure of 3.04 MPa.

The bomb was not purged with oxygen beforehand. Test experiments with and without purging with  $\text{O}_2$  showed results that were also consistent within the experimental uncertainty. The detailed procedure has already been described <sup>25,26</sup>. The combustion products were examined for carbon monoxide (Dräger tube) and unburned carbon, but neither was detected. The energy equivalent of the calorimeter  $\varepsilon_{calor}$  was determined with a standard reference sample of benzoic acid (sample SRM 39j, N.I.S.T.). Correction for nitric acid formation was based on titration with  $0.1 \text{ mol}\cdot\text{dm}^{-3}$  NaOH (aq). Conventional procedures <sup>27</sup> were used for reduction of the data to standard conditions. Auxiliary data required for the reduction are collected in Table S17.

**Table S17**

Auxiliary quantities: formula, density  $\rho$  (293 K), massic heat capacity  $c_p$  (298.15 K), and expansion coefficients  $(\delta V/\delta T)_p$  of the materials used in the present study <sup>a</sup>

| Compounds                 | Formula                             | Water content <sup>b</sup><br>ppm | $\rho$ (293 K)                | $c_p$ (298.15 K)                               | $(\delta V/\delta T)_p^c$                                     |
|---------------------------|-------------------------------------|-----------------------------------|-------------------------------|------------------------------------------------|---------------------------------------------------------------|
|                           |                                     |                                   | $\text{g}\cdot\text{cm}^{-3}$ | $\text{J}\cdot\text{K}^{-1}\cdot\text{g}^{-1}$ | $10^{-3}\cdot\text{cm}^3\cdot\text{K}^{-1}\cdot\text{g}^{-1}$ |
| 1,8-octanediol (cr)       | $\text{C}_8\text{H}_{18}\text{O}_2$ | 63.3                              | 0.94 <sup>d</sup>             | 1.62 <sup>e</sup>                              | 0.1                                                           |
| polyethylene <sup>c</sup> | $\text{CH}_{1.93}$                  |                                   | 0.92                          | 2.53                                           | 0.1                                                           |
| cotton <sup>c</sup>       | $\text{CH}_{1.774}\text{O}_{0.887}$ |                                   | 1.50                          | 1.67                                           | 0.1                                                           |

<sup>a</sup> Data for the densities,  $\rho$  (293 K), and the specific heat capacities,  $c_p$  (298.15 K), of auxiliary materials are from our previous work <sup>28</sup>. The specific energy of combustion  $\Delta_c u^o$  (cotton) =  $-16945.2 \text{ J}\cdot\text{g}^{-1}$ ;  $u(\Delta_c u^o) = 4.2 \text{ J}\cdot\text{g}^{-1}$ . The specific

energy of combustion  $\Delta_c u^o$  (polyethylene) =  $-46354.5 \text{ J}\cdot\text{g}^{-1}$ ;  $u(\Delta_c u^o) = 3.6 \text{ J}\cdot\text{g}^{-1}$ . The standard uncertainties are reported for the specific energies of combustion.

<sup>b</sup> The results of combustion experiments were corrected for this residual amount of water.

<sup>c</sup> Estimated.

<sup>d</sup> Calculated at 293 K using Advanced Chemistry Development (ACD/Labs) Software V11.02 (© 1994-2024 ACD/Labs) with uncertainty  $\pm 0.06 \text{ g/cm}^3$

<sup>e</sup> Calculated from the standard molar heat capacity at 298.15 K (see Table S7).

**Table S18**

Results of typical combustion experiment for 1,8-octanediol at  $T = 298.15 \text{ K}$  ( $p^\circ = 0.1 \text{ MPa}$ )<sup>a</sup>

|                                                       |          |
|-------------------------------------------------------|----------|
| $m$ (substance) /g                                    | 0.369658 |
| $m'$ (cotton) /g                                      | 0.003015 |
| $m''$ (polyethylene) /g                               | 0.291645 |
| $\Delta T_c$ /K                                       | 1.78370  |
| $(\epsilon_{\text{calor}}) \cdot (-\Delta T_c)$ /J    | -26411.4 |
| $(\epsilon_{\text{cont}}) \cdot (-\Delta T_c)$ /J     | -34.0    |
| $\Delta U_{\text{decomp HNO}_3}$ /J                   | 51.36    |
| $\Delta U_{\text{corr}}$ /J                           | 7.89     |
| $-m' \cdot \Delta_c u'$ /J                            | 51.09    |
| $-m'' \cdot \Delta_c u''$ /J                          | 13519.1  |
| $\Delta_c u^o$ (cr) /( $\text{J}\cdot\text{g}^{-1}$ ) | -34669.9 |

<sup>a</sup> The definition of the symbols is in accordance with the Hubbard et al. <sup>27</sup>

The standard specific energies of combustion,  $\Delta_c u^o$  (cr), of 1,8-octanediol are listed in Table S19.

**Table S19.** Summary of all results of the combustion experiments with 1,8-octanediol at  $T = 298.15 \text{ K}$  ( $p^\circ = 0.1 \text{ MPa}$ ) <sup>a</sup>

| Combustion experiment                                                              | $\Delta_c u^o$     |
|------------------------------------------------------------------------------------|--------------------|
| 1                                                                                  | -34669.1           |
| 2                                                                                  | -34675.2           |
| 3                                                                                  | -34675.3           |
| 4                                                                                  | -34668.3           |
| 5                                                                                  | -34668.3           |
| $\langle \Delta_c u^o \rangle$ (cr) /( $\text{J}\cdot\text{g}^{-1}$ ) <sup>a</sup> | $-34671.2 \pm 1.6$ |
| $\Delta_c H_m^o$ (cr) /( $\text{kJ}\cdot\text{mol}^{-1}$ ) <sup>b</sup>            | $-5078.6 \pm 0.9$  |
| $\Delta_f H_m^o$ (cr) /( $\text{kJ}\cdot\text{mol}^{-1}$ ) <sup>b</sup>            | $-642.0 \pm 1.4$   |

<sup>a</sup> Uncertainty of combustion energy is expressed as standard deviation of the mean.

<sup>b</sup> Uncertainties are expressed as the twice standard deviation of the mean.

The total uncertainties of  $\Delta_c H_m^o$  and  $\Delta_f H_m^o$ -values have been calculated according to the guidelines presented by Hubbard *et al.*<sup>27</sup> and Olofsson <sup>29</sup>. The uncertainty of combustion energy,  $\Delta_c u^o$  (cr), is expressed as standard deviation of the mean. According to the thermochemical practice, the uncertainties assigned to the  $\Delta_f H_m^o$  (cr)-value is twice the overall standard deviations and include the

uncertainties of the calibration, the combustion energies of the auxiliary materials, and the uncertainties of the enthalpies of formation of the reaction products H<sub>2</sub>O and CO<sub>2</sub>.

**Table S20**

Enthalpies of formation of the auxiliary molecules involved in reactions R1 and R2

| Compound                                   | $\Delta_f H_m^o(\text{liq}, 298.18 \text{ K}) / \text{kJ}\cdot\text{mol}^{-1}$ |
|--------------------------------------------|--------------------------------------------------------------------------------|
| 2,2-dimethyl-1,3-dioxolane (CAS 2916-31-6) | -430.5±0.3 <sup>30</sup>                                                       |
| 2,2-dimethyl-1,3-dioxane (CAS 695-30-7)    | -468.9±2.1 <sup>31</sup>                                                       |
| acetone                                    | -248.1±0.7 <sup>32</sup>                                                       |
| H <sub>2</sub> O                           | -285.83±0.04 <sup>33</sup>                                                     |

**Table S21**

Calculation of the experimental liquid-phase enthalpies of formation of  $\alpha,\omega$ -alkanediols, in kJ·mol<sup>-1</sup>

| Diol            | $\Delta_f H_m^o(\text{cr}, 298.18 \text{ K})^a$ | $\Delta_{\text{cr}}^1 H_m^o(298.15 \text{ K})^b$ | $\Delta_f H_m^o(\text{liq}, 298.18 \text{ K})^c$ |
|-----------------|-------------------------------------------------|--------------------------------------------------|--------------------------------------------------|
| 1,6-hexanediol  | -579.8±2.5                                      | 21.5±0.5                                         | -558.3±2.6                                       |
| 1,8-octanediol  | -642.0±1.4                                      | 33.1±1.0                                         | -608.9±1.7                                       |
| 1,9-nonanediol  | -668.3±1.7 <sup>d</sup>                         | 34.5±0.7                                         | -633.8±1.5 <sup>e</sup>                          |
| 1,10-decanediol | -698.8±1.0                                      | 40.1±1.5                                         | -658.7±1.8                                       |

<sup>a</sup> Experimental values from Table 8.

<sup>b</sup> Experimental values from Table S12.

<sup>c</sup> Sum of columns 2 and 3 from this table.

<sup>d</sup> Difference between column 4 and 3.

<sup>e</sup> From Table S22.

**Table S22**

Chain length dependence of the liquid-phase enthalpies of formation,  $\Delta_f H_m^o(\text{liq})$ , for  $\alpha,\omega$ -alkanediols (at  $T = 298.15 \text{ K}$  and  $p^\circ = 0.1 \text{ MPa}$ , in kJ·mol<sup>-1</sup>)<sup>a</sup>

| Diol            | $N_C$ | $\Delta_f H_m^o(\text{liq})_{\text{exp}}^b$ | $\Delta_f H_m^o(\text{liq})_{\text{calc}}^c$ | $\Delta^d$ |
|-----------------|-------|---------------------------------------------|----------------------------------------------|------------|
| 1,5-pentanediol | 5     | -530.2±2.5                                  | -531.5                                       | 1.3        |
| 1,6-hexanediol  | 6     | -558.3±2.6                                  | -557.1                                       | -1.2       |
| 1,7-heptanediol | 7     |                                             | -582.7                                       |            |
| 1,8-octanediol  | 8     | -608.9±1.7                                  | -608.2                                       | -0.7       |
| 1,9-nonanediol  | 9     |                                             | -633.8                                       |            |
| 1,10-decanediol | 10    | -658.7±1.8                                  | -659.4                                       | 0.7        |

<sup>a</sup> Uncertainties correspond to expanded uncertainties of the mean (0.95 level of confidence).

<sup>b</sup> From Table S21.

<sup>c</sup> Calculated according to equation:

$$\Delta_f H_m^o(\text{liq}, 298.15 \text{ K}) / (\text{kJ}\cdot\text{mol}^{-1}) = -403.6 - 25.58 \times N_C \text{ with } R^2 = 0.9996 \text{ (for } C \geq 5)$$

derived from the data in this table.

<sup>d</sup> Difference between column 3 and 4.

**Table S23.**

Group-contributions used for the additive calculations of thermochemical properties of alkanediols, in  $\text{kJ}\cdot\text{mol}^{-1}$ , at  $T = 298.15\text{ K}$  ( $p^\circ = 0.1\text{ MPa}$ )

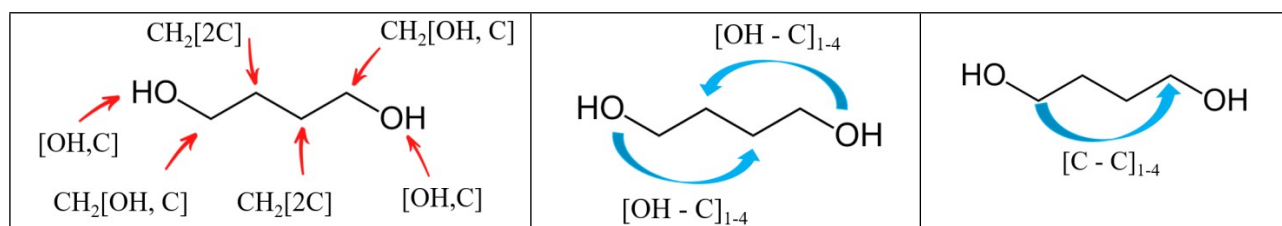

Example for 1,4-butanediol:  $2\times[\text{OH,C}] + 2\times\text{CH}_2[\text{OH,C}] + 2\times\text{CH}_2[2\text{C}] + 2\times[\text{OH-C}]_{1-4} + [\text{C-C}]_{1-4}$

| Symbol <sup>a</sup>    | Contribution to $\Delta_f H_m^\circ(\text{liq})^b$ | Contribution to $\Delta_l^g H_m^\circ/298.15\text{ K}^b$ | Contribution to $\Delta_f H_m^\circ(\text{g})^b$ |
|------------------------|----------------------------------------------------|----------------------------------------------------------|--------------------------------------------------|
| [OH,C]                 | -190.4                                             | 31.80                                                    | -158.60                                          |
| CH <sub>2</sub> [OH,C] | -32.25                                             | 6.90                                                     | -29.03                                           |
| CH <sub>2</sub> [2C]   | -28.93                                             | 4.52                                                     | -23.80                                           |
| [OH-C] <sub>1-4</sub>  | -2.25                                              | -2.10                                                    | -1.00                                            |
| [C-C] <sub>1-4</sub>   | 3.11                                               | -0.26                                                    | 2.10                                             |

<sup>a</sup> The explanation can be found in the figure above.

<sup>b</sup> The group-contributions were developed in our previous work<sup>34</sup> using experimental data for alkanes and alkanols. The contributions for [OH-C]<sub>1-4</sub> and [C-C]<sub>1-4</sub> were adjusted for the experimental data of diols in this work.

## References

- 1 S. P. Verevkin and V. N. Emel'yanenko, Transpiration method: Vapor pressures and enthalpies of vaporization of some low-boiling esters, *Fluid Phase Equilib.*, 2008, **266**, 64–75.
- 2 S. P. Verevkin, A. Y. Sazonova, V. N. Emel'yanenko, D. H. Zaitsau, M. A. Varfolomeev, B. N. Solomonov and K. V. Zherikova, Thermochemistry of Halogen-Substituted Methylbenzenes, *J. Chem. Eng. Data*, 2015, **60**, 89–103.
- 3 V. N. Emel'yanenko and S. P. Verevkin, Benchmark thermodynamic properties of 1,3-propanediol: Comprehensive experimental and theoretical study, *J. Chem. Thermodyn.*, 2015, **85**, 111–119.
- 4 R. Siewert, V. V. Emelyanov, A. A. Samarov, M. Richter, K. Müller and S. P. Verevkin, Empirical Rules in Thermochemistry: Overlooked Overestimations of the Liquid- and Crystal-Phase Heat Capacities of  $\alpha,\omega$ -Alkanediols and Their Consequences, *Liquids*, 2025, **5**, 20.
- 5 SciFinder - Chemical Abstracts Service, Available online: <http://scifinder.cas.org/> (accessed on 25.10.2025).
- 6 Reaxys, Available online: <https://www.reaxys.com/> (accessed on 25.10.2025).
- 7 Guidechem Chemical Network. Available online: <https://www.guidechem.com> (accessed on 25.10.2025).

- 8 A. A. Samarov and S. P. Verevkin, Comprehensive thermodynamic study of alkyl-biphenyls as a promising liquid organic hydrogen carriers, *J. Chem. Thermodyn.*, 2022, **174**, 106872.
- 9 C. T. Peng, Prediction of retention indices, *J. Chromatogr. A*, 2000, **903**, 117–143.
- 10 P. N. Nikolaev and I. B. Rabinovich, Heat capacity of ethylene glycol and ethylene deuteroglycol in the temperature range 80–300K, *Zhur. Fiz. Khim.*, 1967, **41**, 2191–2194.
- 11 G. S. Parks and K. K. Kelley, Thermal Data on Organic Compounds II. The Heat Capacities of Five Organic Compounds. The Entropies and Free Energies of Some Homologous Series of Aliphatic Compounds, *J. Am. Chem. Soc.*, 1925, **47**, 2089–2097.
- 12 P. Knauth and R. Sabbah, Energetics of intra- and intermolecular bonds in  $\omega$ -alkanediols. III. Thermochemical study of 1,6-hexanediol, 1,7-heptanediol, 1,8-octanediol, 1,9-nonanediol, and 1,10-decanediol at 298.15 K, *Can. J. Chem.*, 1990, **68**, 731–734.
- 13 S. Jabrane, J. . Létoffé and P. Claudy, Study of the thermal behaviour of 1,3-propanediol and its aqueous solutions, *Thermochim. Acta*, 1998, **311**, 121–127.
- 14 V. P. Nistratov, A. G. Babinkov, K. G. Shvetsova and S. A. Lapteva, Heat capacity and thermodynamic functions of tetramethyleneglycol, *Termodin. Org. Soedin.*, 1979, **8**, 33–36.
- 15 A. K. Borisov, V. M. Egorov and V. A. Marikhin, An investigation of the thermodynamic properties of molecular crystals by the differential scanning calorimetry, *J. Phys. Conf. Ser.*, 2019, **1236**, 012010.
- 16 P. Miller, The free energy of furfural and some of its derivatives, *Iowa State Coll. J. Sci.*, 1936, **10**, 91–93.
- 17 P. J. Gardner and K. S. Hussain, The standard enthalpies of formation of some aliphatic diols, *J. Chem. Thermodyn.*, 1972, **4**, 819–827.
- 18 W. V. Steele, R. D. Chirico, A. Nguyen, I. A. Hossenlopp and N. K. Smith, DIPPR project 871: Determination of ideal-gas enthalpies of formation for key compounds: The 1989 project results, *DIPPR Data Ser.*, 1991, **1**, 101–134.
- 19 N. N. Smirnova, K. V. Kandejev and T. A. Bykova, The thermodynamic properties of 1,6-hexanediol over the temperature range from  $T \rightarrow 0$  to 370 K, *Russ. J. Phys. Chem.*, 2005, **79**, 857–861.
- 20 E. Badea, B. Nowicka and G. Della Gatta, Thermodynamics of fusion and sublimation for a homologous series of eleven alkane- $\alpha,\omega$ -diols HO-(CH<sub>2</sub>)<sub>n</sub>-OH: Structure-related odd–even effect, *J. Chem. Thermodyn.*, 2014, **68**, 90–97.
- 21 W. V. Steele, R. D. Chirico, I. A. Hossenlopp, S. E. Knipmeyer, A. Nguyen and N. K. Smith, DIPPR project 871. Determination of ideal-gas enthalpies of formation for key compounds. The 1990 project results., *DIPPR Data Ser.*, 1994, **2**, 188–215.
- 22 L. Li, Z.-C. Tan, S.-H. Meng and Y.-J. Song, A thermochemical study of 1,10-decanediol, *Thermochim. Acta*, 1999, **342**, 53–57.
- 23 P. Umnahanant, S. Kweskin, G. Nichols, M. J. Dunn, H. Smart-Ebinne and J. S. Chickos, Vaporization Enthalpies of the  $\alpha,\omega$ -Alkanediols by Correlation Gas Chromatography, *J. Chem. Eng. Data*, 2006, **51**, 2246–2254.
- 24 Y. Ogawa and N. Nakamura, Phase Transitions of Pure Long-Chain  $\alpha$ ,  $\omega$  -Alkanediols from C13 to C24, *Bull. Chem. Soc. Jpn.*, 1999, **72**, 943–946.
- 25 S. P. Verevkin and C. Schick, Substituent effects on the benzene ring. Determination of the intramolecular interactions of substituents in tert-alkyl-substituted catechols from thermochemical measurements, *J. Chem. Eng. Data*, 2000, **45**, 946–952.
- 26 V. N. Emel'yanenko, S. P. Verevkin and A. Heintz, The Gaseous Enthalpy of Formation of the Ionic Liquid 1-Butyl-3-methylimidazolium Dicyanamide from Combustion Calorimetry, Vapor Pressure Measurements, and Ab Initio Calculations, *J. Am. Chem. Soc.*, 2007, **129**, 3930–3937.
- 27 G. Hubbard, W. N.; Scott, D. W.; Waddington, Standard States and Corrections for Combustions in a Bomb at Constant Volume, in: F.D. Rossini (ed.), *Experimental Thermochemistry*, Interscience Publishers, New York, 1956, 75–128.
- 28 S. P. Verevkin, Thermochemistry of phenols: Quantification of the ortho-, para-, and meta-

- interactions in tert-alkyl substituted phenols, *J. Chem. Thermodyn.*, 1999, **31**, 559–585.
- 29 G. Olofsson, Assignment of Uncertainties, in: S. Sunner, M. Månsson (Eds.), *Combustion Calorimetry: Experimental Chemical Thermodynamics*, Pergamon, New York, 1979, 137–161.
- 30 S. P. Verevkin, W.-H. Peng, H.-D. Beckhaus and C. Rüchardt, Does the Anomeric Effect in Ketals Depend on the Hybridization of the Central Carbon Atom?, *European J. Org. Chem.*, 1998, **1998**, 2323–2332.
- 31 K. Pihlaja, S. Luoma, T. Olson and T. Norin, Heats of Formation and Conformational Energies of 1,3-Dioxane and Its Methyl Homologues., *Acta Chem. Scand.*, 1968, **22**, 2401–2414.
- 32 J. B. Pedley, R. D. Naylor and S. P. Kirby, *Thermochemical data of organic compounds*, Chapman and Hall, New York, 1986, 1–792.
- 33 J. D. Cox, D. D. Wagman and V. A. Medvedev, *CODATA Key Values for Thermodynamics: Final Report of the CODATA Task Group on Key Values for Thermodynamics. CODATA Series on Thermodynamic*, Hemisphere Publ. Corp., New York,.
- 34 G. N. Roganov, P. N. Pisarev, V. N. Emel'yanenko and S. P. Verevkin, Measurement and prediction of thermochemical properties. Improved benson-type increments for the estimation of enthalpies of vaporization and Standard Enthalpies of Formation of Aliphatic Alcohols, *J. Chem. Eng. Data*, 2005, **50**, 1114–1124.
